# Supplementary material for: Pan-GWAS of Streptococcus agalactiae Highlights Lineage-Specific Genes Associated with Virulence and Niche Adaptation
Source: PubMed Central journal article supplement (PMC7373188; doi:10.1128/mbio.00728-20), 2020-06-09

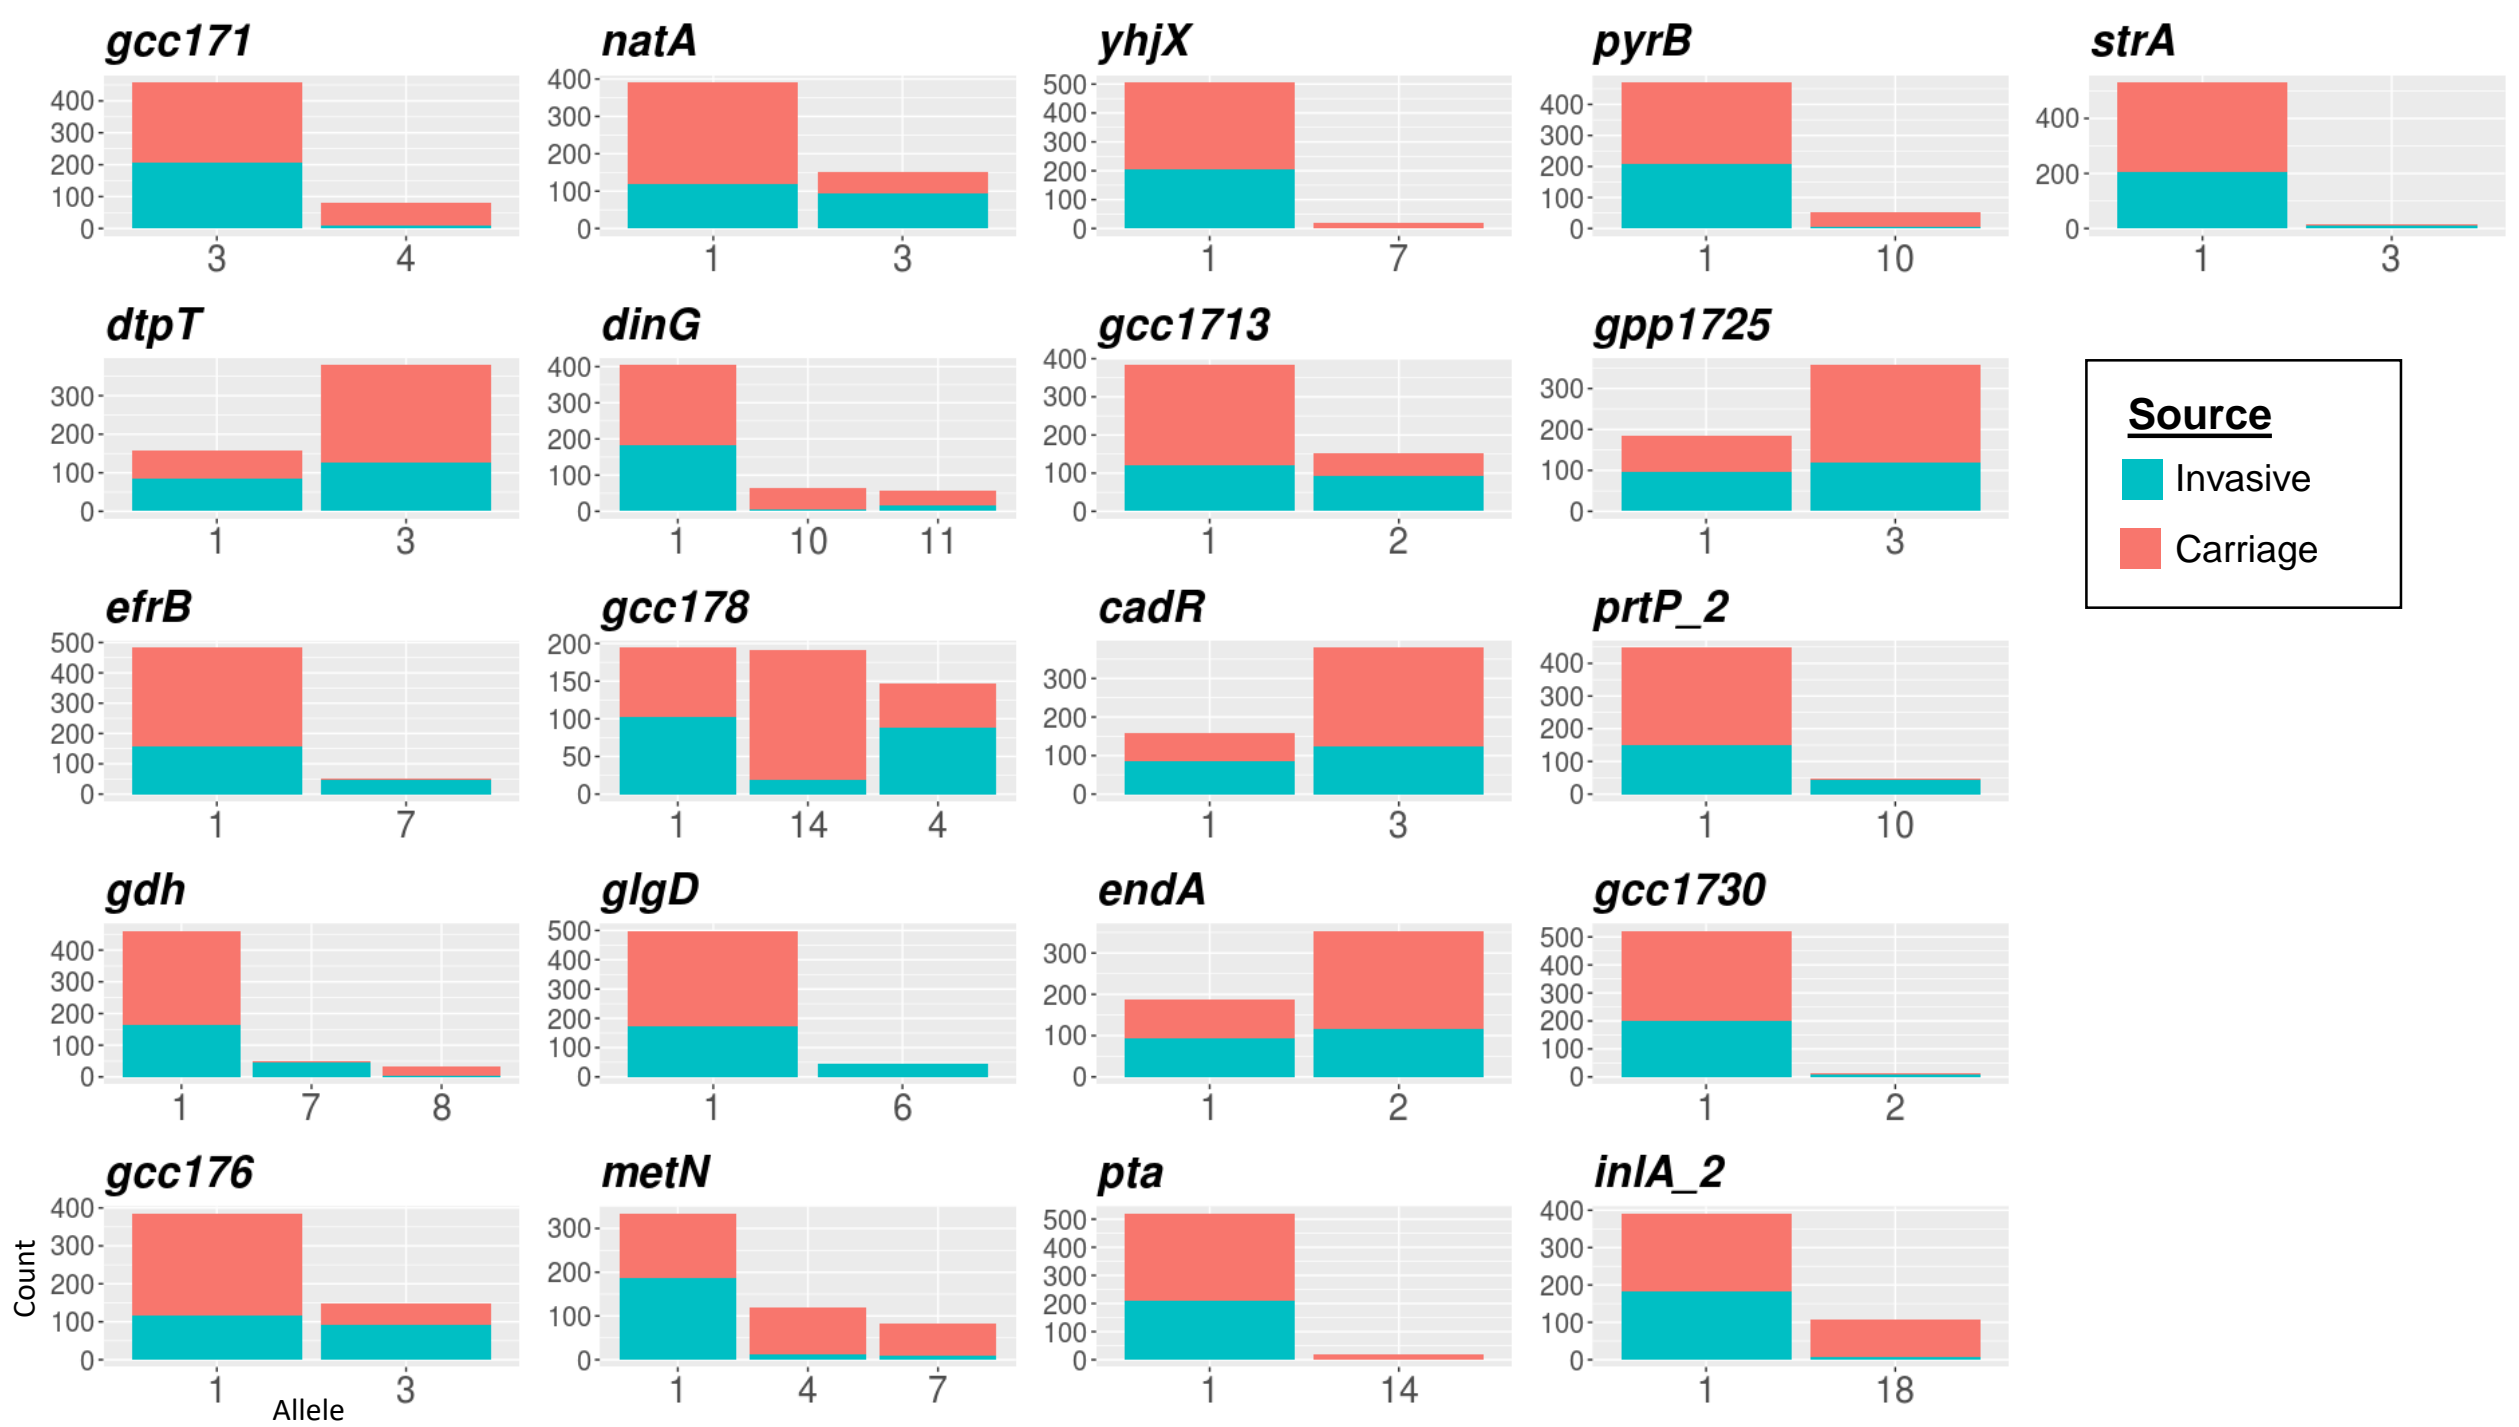

Supplement: mBio.00728-20-sf005.pdf [file mBio.00728-20-sf005.pdf]
