# Supplementary material for: Pan-GWAS of Streptococcus agalactiae Highlights Lineage-Specific Genes Associated with Virulence and Niche Adaptation
Source: PubMed Central journal article supplement (PMC7373188; doi:10.1128/mbio.00728-20), 2020-06-09
Supplement: mBio.00728-20-st001.pdf [file mBio.00728-20-st001.pdf]

| Name                     | CC   | Source   | country | Serotype | Year | MLST-Type | ENA Acc. Number |
|--------------------------|------|----------|---------|----------|------|-----------|-----------------|
| 1000 NETGBS STREPCAR 145 | CC23 | carrier  | Malawi  | V        | 2008 | 24        | ERR840684       |
| 1001 NETGBS C10285       | CC17 | invasive | Malawi  | III      | 2004 | 17        | ERR840685       |
| 1002 NETGBS STREPCAR 158 | CC17 | carrier  | Malawi  | III      | 2008 | 17        | ERR840686       |
| 1003 NETGBS C10367       | CC17 | invasive | Malawi  | III      | 2004 | 17        | ERR840687       |
| 1004 NETGBS STREPCAR 182 | CC23 | carrier  | Malawi  | Ia       | 2008 | 23        | ERR840688       |
| 1005 NETGBS D27359       | CC17 | invasive | Malawi  | III      | 2004 | 17        | ERR840689       |
| 1006 NETGBS STREPCAR 189 | CC19 | carrier  | Malawi  | V        | 2008 | 327       | ERR840690       |
| 1007 NETGBS D27967       | CC17 | invasive | Malawi  | III      | 2004 | 17        | ERR840691       |
| 1008 NETGBS STREPCAR 191 | CC17 | carrier  | Malawi  | III      | 2008 | 17        | ERR840692       |
| 1009 NETGBS D27979A      | CC19 | invasive | Malawi  | III      | 2004 | 28        | ERR840693       |
| 1010 NETGBS STREPCAR 194 | CC23 | carrier  | Malawi  | V        | 2008 | 24        | ERR840694       |
| 1011 NETGBS D28080       | CC17 | invasive | Malawi  | III      | 2004 | 867       | ERR840695       |
| 1012 NETGBS STREPCAR 206 | CC23 | carrier  | Malawi  | Ia       | 2008 | 23        | ERR840696       |
| 1013 NETGBS D28665       | CC17 | invasive | Malawi  | III      | 2004 | 17        | ERR840697       |
| 1014 NETGBS STREPCAR 258 | CC23 | carrier  | Malawi  | V        | 2009 | 24        | ERR840698       |
| 1015 NETGBS C11288       | CC17 | invasive | Malawi  | III      | 2005 | 109       | ERR840699       |
| 1016 NETGBS STREPCAR 266 | CC23 | carrier  | Malawi  | Ia       | 2009 | 23        | ERR840700       |
| 1017 NETGBS D31106       | CC23 | invasive | Malawi  | Ia       | 2005 | 23        | ERR840701       |
| 1018 NETGBS STREPCAR 279 | CC17 | carrier  | Malawi  | III      | 2009 | 17        | ERR840702       |
| 1020 NETGBS STREPCAR 284 | CC23 | carrier  | Malawi  | Ia       | 2009 | 23        | ERR840704       |
| 1021 NETGBS D31426       | CC17 | invasive | Malawi  | III      | 2005 | 17        | ERR840705       |
| 1022 NETGBS STREPCAR 289 | CC23 | carrier  | Malawi  | V        | 2009 | 24        | ERR840706       |
| 1023 NETGBS C11802       | CC17 | invasive | Malawi  | III      | 2005 | 17        | ERR840707       |
| 1024 NETGBS STREPCAR 306 | CC1  | carrier  | Malawi  | Ia       | 2009 | 1         | ERR840708       |
| 1025 NETGBS D31476       | CC17 | invasive | Malawi  | III      | 2005 | 17        | ERR840709       |
| 1026 NETGBS STREPCAR 307 | CC23 | carrier  | Malawi  | V        | 2009 | 23        | ERR840710       |
| 1027 NETGBS C11826       | CC17 | invasive | Malawi  | III      | 2005 | 17        | ERR840711       |
| 1028 NETGBS STREPCAR 313 | CC23 | carrier  | Malawi  | Ia       | 2009 | 23        | ERR840712       |
| 1029 NETGBS D31518       | CC17 | invasive | Malawi  | III      | 2005 | 17        | ERR840713       |
| 1030 NETGBS STREPCAR 315 | CC17 | carrier  | Malawi  | III      | 2009 | 17        | ERR840714       |
| 1032 NETGBS STREPCAR 324 | CC17 | carrier  | Malawi  | III      | 2009 | 17        | ERR840716       |
| 1033 NETGBS D31771       | N/D  | invasive | Malawi  | II       | 2005 |           | ERR840717       |
| 1034 NETGBS STREPCAR 325 | CC19 | carrier  | Malawi  | V        | 2009 | 327       | ERR840718       |
| 1035 NETGBS D31823       | CC17 | invasive | Malawi  | III      | 2005 | 17        | ERR840719       |
| 1038 NETGBS STREPCAR 356 | CC17 | carrier  | Malawi  | III      | 2009 | 17        | ERR840722       |
| 1039 NETGBS D32679       | CC23 | invasive | Malawi  | Ia       | 2005 | 23        | ERR840723       |
| 1040 NETGBS STREPCAR 394 | CC17 | carrier  | Malawi  | III      | 2009 | 17        | ERR840724       |
| 1041 NETGBS C12327       | CC17 | invasive | Malawi  | III      | 2005 | 17        | ERR840725       |
| 1043 NETGBS D32872       | CC17 | invasive | Malawi  | III      | 2005 | 17        | ERR840727       |
| 1045 NETGBS C12445       | CC17 | invasive | Malawi  | III      | 2005 | 17        | ERR840729       |
| 1049 NETGBS C12548       | CC17 | invasive | Malawi  | III      | 2005 | 17        | ERR840733       |
| 1050 NETGBS STREPCAR 429 | CC19 | carrier  | Malawi  | V        | 2009 | 327       | ERR840734       |
| 1051 NETGBS D33430       | CC17 | invasive | Malawi  | III      | 2005 | 17        | ERR840735       |
| 1053 NETGBS D34216       | CC17 | invasive | Malawi  | III      | 2005 | 17        | ERR840737       |
| 1054 NETGBS STREPCAR 450 | CC23 | carrier  | Malawi  | Ia       | 2009 | 23        | ERR840738       |
| 1055 NETGBS C12852       | CC17 | invasive | Malawi  | III      | 2005 | 17        | ERR840739       |
| 1056 NETGBS STREPCAR 463 | CC23 | carrier  | Malawi  | Ia       | 2009 | 23        | ERR840740       |
| 1058 NETGBS STREPCAR 467 | CC23 | carrier  | Malawi  | Ia       | 2009 | 23        | ERR840742       |
| 1059 NETGBS D35054       | CC17 | invasive | Malawi  | III      | 2005 | 866       | ERR840743       |
| 1061 NETGBS C13174       | CC17 | invasive | Malawi  | III      | 2005 | 17        | ERR840745       |
| 1063 NETGBS D35392       | CC17 | invasive | Malawi  | III      | 2005 | 17        | ERR840747       |
| 1065 NETGBS D36580       | CC17 | invasive | Malawi  | III      | 2006 | 17        | ERR840749       |
| 1066 NETGBS STREPCAR 529 | CC23 | carrier  | Malawi  | V        | 2009 | 223       | ERR840750       |
| 1067 NETGBS D36637       | CC17 | invasive | Malawi  | III      | 2006 | 17        | ERR840751       |
| 1068 NETGBS STREPCAR 531 | CC23 | carrier  | Malawi  | Ia       | 2009 | 23        | ERR840752       |
| 1069 NETGBS D37811       | CC17 | invasive | Malawi  | III      | 2006 | 17        | ERR840753       |
| 1070 NETGBS STREPCAR 561 | CC17 | carrier  | Malawi  | V        | 2009 | 17        | ERR840754       |
| 1071 NETGBS C13986       | CC17 | invasive | Malawi  | III      | 2006 | 17        | ERR840755       |
| 1072 NETGBS STREPCAR 565 | CC19 | carrier  | Malawi  | V        | 2009 | 327       | ERR840756       |
| 1073 NETGBS C14243       | CC17 | invasive | Malawi  | III      | 2006 | 17        | ERR840757       |
| 1074 NETGBS STREPCAR 566 | CC19 | carrier  | Malawi  | V        | 2009 | 327       | ERR840758       |

|      |                      |      |          |        |     |      |     |           |
|------|----------------------|------|----------|--------|-----|------|-----|-----------|
| 1075 | NETGBS D38644        | CC17 | invasive | Malawi | III | 2006 | 17  | ERR840759 |
| 1079 | NETGBS D39631        | CC17 | invasive | Malawi | III | 2006 | 17  | ERR840763 |
| 1082 | NETGBS STREPCAR 609  | CC17 | carrier  | Malawi | III | 2009 | 17  | ERR840766 |
| 1083 | NETGBS D40942        | CC17 | invasive | Malawi | III | 2007 | 17  | ERR840767 |
| 1084 | NETGBS STREPCAR 633  | CC23 | carrier  | Malawi | Ia  | 2009 | 23  | ERR840768 |
| 1085 | NETGBS D43106        | CC17 | invasive | Malawi | III | 2007 | 868 | ERR840769 |
| 1086 | NETGBS STREPCAR 636  | CC23 | carrier  | Malawi | Ia  | 2009 | 23  | ERR840770 |
| 1087 | NETGBS D44762        | CC17 | invasive | Malawi | III | 2007 | 17  | ERR840771 |
| 1088 | NETGBS STREPCAR 639  | CC23 | carrier  | Malawi | Ia  | 2009 | 23  | ERR840772 |
| 1089 | NETGBS C17687        | CC17 | invasive | Malawi | III | 2008 | 17  | ERR840773 |
| 1090 | NETGBS STREPCAR 640  | CC23 | carrier  | Malawi | Ia  | 2009 | 23  | ERR840774 |
| 1091 | NETGBS C17799        | CC17 | invasive | Malawi | III | 2008 | 17  | ERR840775 |
| 1092 | NETGBS STREPCAR 643  | CC17 | carrier  | Malawi | III | 2009 | 17  | ERR840776 |
| 1093 | NETGBS D46721        | CC17 | invasive | Malawi | III | 2008 | 17  | ERR840777 |
| 1095 | NETGBS D47658        | CC17 | invasive | Malawi | III | 2008 | 17  | ERR840779 |
| 1099 | NETGBS D48747        | CC17 | invasive | Malawi | III | 2008 | 17  | ERR840783 |
| 1100 | NETGBS STREPCAR 822  | CC19 | carrier  | Malawi | V   | 2009 | 327 | ERR840784 |
| 1101 | NETGBS D48955        | CC10 | invasive | Malawi | Ib  | 2008 | 10  | ERR840785 |
| 1102 | NETGBS STREPCAR 823  | N/D  | carrier  | Malawi | V   | 2009 |     | ERR840786 |
| 1103 | NETGBS D49166        | CC17 | invasive | Malawi | III | 2008 | 17  | ERR840787 |
| 1104 | NETGBS STREPCAR 827  | N/D  | carrier  | Malawi | III | 2009 |     | ERR840788 |
| 1105 | NETGBS D51502        | CC17 | invasive | Malawi | III | 2009 | 17  | ERR840789 |
| 1106 | NETGBS STREPCAR 875  | CC23 | carrier  | Malawi | NT  | 2009 | 23  | ERR840790 |
| 1107 | NETGBS D52468        | CC19 | invasive | Malawi | III | 2009 | 28  | ERR840791 |
| 1109 | NETGBS C21622        | CC17 | invasive | Malawi | III | 2009 | 17  | ERR840793 |
| 1110 | NETGBS STREPCAR 1028 | CC17 | carrier  | Malawi | III | 2009 | 17  | ERR840794 |
| 1111 | NETGBS C15979        | CC17 | invasive | Malawi | III | 2007 | 17  | ERR840795 |
| 1112 | NETGBS STREPCAR 1043 | CC17 | carrier  | Malawi | Ia  | 2009 | 17  | ERR840796 |
| 1113 | NETGBS D50751        | CC17 | invasive | Malawi | III | 2009 | 17  | ERR840797 |
| 1114 | NETGBS STREPCAR 1067 | CC17 | carrier  | Malawi | III | 2009 | 17  | ERR840798 |
| 1115 | NETGBS D52378        | CC17 | invasive | Malawi | III | 2009 | 17  | ERR840799 |
| 1116 | NETGBS STREPCAR 1137 | CC17 | carrier  | Malawi | III | 2009 | 869 | ERR840800 |
| 1117 | NETGBS D55627        | CC17 | invasive | Malawi | III | 2010 | 17  | ERR840801 |
| 1118 | NETGBS STREPCAR 1149 | CC17 | carrier  | Malawi | III | 2009 | 17  | ERR840802 |
| 1119 | NETGBS BCN103        | CC17 | invasive | Malawi | III | 2010 | 17  | ERR840803 |
| 1120 | NETGBS STREPCAR 1158 | CC17 | carrier  | Malawi | III | 2009 | 17  | ERR840804 |
| 1122 | NETGBS STREPCAR 1159 | CC23 | carrier  | Malawi | Ia  | 2009 | 23  | ERR840806 |
| 1123 | NETGBS 1011471       | CC17 | invasive | Malawi | III | 2010 | 17  | ERR840807 |
| 1124 | NETGBS STREPCAR 1196 | CC19 | carrier  | Malawi | V   | 2009 | 327 | ERR840808 |
| 1125 | NETGBS 1014197       | CC17 | invasive | Malawi | III | 2011 | 17  | ERR840809 |
| 1126 | NETGBS STREPCAR 1203 | CC19 | carrier  | Malawi | V   | 2009 | 327 | ERR840810 |
| 1128 | NETGBS STREPCAR 1226 | CC17 | carrier  | Malawi | III | 2009 | 17  | ERR840812 |
| 1129 | NETGBS BCN11Z        | CC17 | invasive | Malawi | III | 2011 | 17  | ERR840813 |
| 1131 | NETGBS 1016321       | CC17 | invasive | Malawi | III | 2011 | 17  | ERR840815 |
| 1132 | NETGBS STREPCAR 1302 | CC17 | carrier  | Malawi | III | 2009 | 870 | ERR840816 |
| 1133 | NETGBS 1016523       | CC17 | invasive | Malawi | III | 2011 | 17  | ERR840817 |
| 1134 | NETGBS STREPCAR 1330 | CC17 | carrier  | Malawi | III | 2009 | 17  | ERR840818 |
| 1136 | NETGBS 1022709       | CC17 | invasive | Malawi | III | 2011 | 17  | ERR840820 |
| 1138 | NETGBS 1024925       | CC17 | invasive | Malawi | III | 2011 | 17  | ERR840822 |
| 1139 | NETGBS STREPCAR 1370 | CC17 | carrier  | Malawi | III | 2009 | 17  | ERR840823 |
| 1140 | NETGBS 1025174       | CC17 | invasive | Malawi | III | 2011 | 17  | ERR840824 |
| 1141 | NETGBS STREPCAR 1374 | CC19 | carrier  | Malawi | V   | 2009 | 327 | ERR840825 |
| 1142 | NETGBS 1029273       | CC17 | invasive | Malawi | III | 2012 | 17  | ERR840826 |
| 1143 | NETGBS STREPCAR 1435 | CC23 | carrier  | Malawi | Ia  | 2009 | 23  | ERR840827 |
| 1144 | NETGBS 1032982       | CC17 | invasive | Malawi | III | 2012 | 17  | ERR840828 |
| 1145 | NETGBS STREPCAR 1448 | CC19 | carrier  | Malawi | V   | 2009 | 327 | ERR840829 |
| 1146 | NETGBS 1035321       | CC17 | invasive | Malawi | III | 2012 | 17  | ERR840830 |
| 1148 | NETGBS 1035358       | CC17 | invasive | Malawi | III | 2012 | 17  | ERR840832 |
| 1151 | NETGBS BKQ3RF        | CC17 | invasive | Malawi | III | 2013 | 17  | ERR840835 |
| 1152 | NETGBS STREPCAR 1543 | CC17 | carrier  | Malawi | NT  | 2010 | 17  | ERR840836 |
| 1153 | NETGBS BKQ4TM        | CC17 | invasive | Malawi | III | 2013 | 866 | ERR840837 |
| 1154 | NETGBS STREPCAR 1544 | CC23 | carrier  | Malawi | V   | 2010 | 223 | ERR840838 |

|                           |      |          |        |     |      |     |            |
|---------------------------|------|----------|--------|-----|------|-----|------------|
| 1155 NETGBS BKR2NF        | CC23 | invasive | Malawi | Ia  | 2013 | 23  | ERR840839  |
| 1156 NETGBS STREPCAR 1547 | CC17 | carrier  | Malawi | III | 2010 | 17  | ERR840840  |
| 1158 NETGBS STREPCAR 1556 | CC23 | carrier  | Malawi | V   | 2010 | 24  | ERR840842  |
| 1159 NETGBS BKQ6Q9        | CC17 | invasive | Malawi | III | 2013 | 17  | ERR840843  |
| 1163 NETGBS BKQBUE        | CC17 | invasive | Malawi | III | 2014 | 17  | ERR840847  |
| 1272 GB00112              | CC17 | invasive | Canada | NT  | 1999 | 17  |            |
| 1475 NGBS10               | CC1  | invasive | Canada | V   | 2009 | 1   | SRR1790740 |
| 1476 NGBS107              | CC1  | invasive | Canada | V   | 2010 | 1   | SRR1790741 |
| 1477 NGBS110              | CC1  | invasive | Canada | V   | 2010 | 1   | SRR1790742 |
| 1478 NGBS117              | CC1  | invasive | Canada | V   | 2010 | 1   | SRR1790743 |
| 1480 NGBS164              | N/D  | invasive | Canada | V   | 2010 |     | SRR1790745 |
| 1481 NGBS171              | CC1  | invasive | Canada | V   | 2010 | 1   | SRR1790746 |
| 1482 NGBS172              | CC1  | invasive | Canada | V   | 2010 | 1   | SRR1790747 |
| 1483 NGBS177              | CC1  | invasive | Canada | V   | 2010 | 1   | SRR1790748 |
| 1484 NGBS180              | CC1  | invasive | Canada | V   | 2010 | 1   | SRR1790749 |
| 1485 NGBS200              | CC1  | invasive | Canada | V   | 2010 | 1   | SRR1790750 |
| 1486 NGBS21               | CC1  | invasive | Canada | V   | 2009 | 1   | SRR1790751 |
| 1487 NGBS210              | CC1  | invasive | Canada | V   | 2011 | 1   | SRR1790752 |
| 1488 NGBS22               | CC1  | invasive | Canada | V   | 2009 | 1   | SRR1790753 |
| 1490 NGBS234              | N/D  | invasive | Canada | V   | 2010 |     | SRR1790755 |
| 1491 NGBS241              | CC1  | invasive | Canada | V   | 2011 | 453 | SRR1790756 |
| 1492 NGBS244              | CC1  | invasive | Canada | V   | 2011 | 871 | SRR1790757 |
| 1493 NGBS246              | CC1  | invasive | Canada | V   | 2011 | 1   | SRR1790758 |
| 1494 NGBS25               | CC1  | invasive | Canada | V   | 2009 | 1   | SRR1790759 |
| 1495 NGBS267              | CC1  | invasive | Canada | V   | 2010 | 1   | SRR1790760 |
| 1496 NGBS272              | CC1  | invasive | Canada | V   | 2011 | 1   | SRR1790761 |
| 1497 NGBS273              | CC1  | invasive | Canada | V   | 2011 | 1   | SRR1790762 |
| 1498 NGBS275              | CC1  | invasive | Canada | V   | 2010 | 1   | SRR1790763 |
| 1499 NGBS279              | CC1  | invasive | Canada | V   | 2010 | 1   | SRR1790764 |
| 1500 NGBS28               | CC1  | invasive | Canada | V   | 2009 | 1   | SRR1790765 |
| 1501 NGBS283              | CC1  | invasive | Canada | V   | 2010 | 1   | SRR1790766 |
| 1502 NGBS287              | CC1  | invasive | Canada | V   | 2010 | 1   | SRR1790767 |
| 1503 NGBS288              | CC1  | invasive | Canada | V   | 2010 | 1   | SRR1790768 |
| 1504 NGBS298              | CC1  | invasive | Canada | V   | 2011 | 1   | SRR1790769 |
| 1505 NGBS30               | CC1  | invasive | Canada | V   | 2010 | 1   | SRR1790770 |
| 1506 NGBS303              | CC1  | invasive | Canada | V   | 2010 | 1   | SRR1790771 |
| 1507 NGBS321              | CC1  | invasive | Canada | V   | 2011 | 1   | SRR1790772 |
| 1508 NGBS323              | CC1  | invasive | Canada | V   | 2011 | 1   | SRR1790773 |
| 1509 NGBS325              | CC1  | invasive | Canada | V   | 2011 | 1   | SRR1790774 |
| 1510 NGBS330              | CC1  | invasive | Canada | V   | 2011 | 1   | SRR1790775 |
| 1511 NGBS331              | CC1  | invasive | Canada | V   | 2011 | 1   | SRR1790776 |
| 1512 NGBS332              | CC1  | invasive | Canada | V   | 2011 | 1   | SRR1790777 |
| 1514 NGBS348              | CC1  | invasive | Canada | V   | 2011 | 1   | SRR1790779 |
| 1515 NGBS35               | CC1  | invasive | Canada | V   | 2010 | 1   | SRR1790780 |
| 1516 NGBS357              | CC1  | invasive | Canada | V   | 2011 | 1   | SRR1790781 |
| 1517 NGBS359              | CC1  | invasive | Canada | V   | 2011 | 1   | SRR1790782 |
| 1518 NGBS360              | CC1  | invasive | Canada | V   | 2011 | 1   | SRR1790783 |
| 1519 NGBS372              | CC1  | invasive | Canada | V   | 2011 | 1   | SRR1790784 |
| 1520 NGBS380              | CC1  | invasive | Canada | V   | 2011 | 1   | SRR1790785 |
| 1521 NGBS381              | CC1  | invasive | Canada | V   | 2011 | 1   | SRR1790786 |
| 1522 NGBS411              | CC1  | invasive | Canada | V   | 2011 | 1   | SRR1790787 |
| 1523 NGBS418              | CC1  | invasive | Canada | V   | 2011 | 1   | SRR1790788 |
| 1524 NGBS425              | CC1  | invasive | Canada | V   | 2011 | 1   | SRR1790789 |
| 1526 NGBS444              | CC1  | invasive | Canada | V   | 2011 | 1   | SRR1790792 |
| 1527 NGBS462              | CC1  | invasive | Canada | V   | 2011 | 1   | SRR1790793 |
| 1528 NGBS492              | CC1  | invasive | Canada | V   | 2012 | 1   | SRR1790794 |
| 1530 NGBS497              | CC1  | invasive | Canada | V   | 2012 | 1   | SRR1790796 |
| 1531 NGBS499              | CC1  | invasive | Canada | V   | 2012 | 1   | SRR1790797 |
| 1533 NGBS519              | CC1  | invasive | Canada | V   | 2012 | 1   | SRR1790799 |
| 1534 NGBS536              | CC1  | invasive | Canada | V   | 2012 | 1   | SRR1790800 |
| 1535 NGBS54               | CC1  | invasive | Canada | V   | 2010 | 1   | SRR1790801 |
| 1536 NGBS553              | CC1  | invasive | Canada | V   | 2012 | 1   | SRR1790802 |

|      |         |     |          |        |   |      |     |            |
|------|---------|-----|----------|--------|---|------|-----|------------|
| 1537 | NGBS558 | CC1 | invasive | Canada | V | 2012 | 1   | SRR1790803 |
| 1538 | NGBS561 | CC1 | invasive | Canada | V | 2012 | 1   | SRR1790804 |
| 1540 | NGBS579 | CC1 | invasive | Canada | V | 2012 | 1   | SRR1790806 |
| 1541 | NGBS580 | CC1 | invasive | Canada | V | 2012 | 1   | SRR1790807 |
| 1542 | NGBS586 | CC1 | invasive | Canada | V | 2012 | 1   | SRR1790808 |
| 1543 | NGBS604 | CC1 | invasive | Canada | V | 2012 | 1   | SRR1790809 |
| 1544 | NGBS624 | CC1 | invasive | Canada | V | 2012 | 1   | SRR1790810 |
| 1545 | NGBS63  | CC1 | invasive | Canada | V | 2010 | 1   | SRR1790811 |
| 1546 | NGBS630 | CC1 | invasive | Canada | V | 2012 | 1   | SRR1790812 |
| 1547 | NGBS633 | CC1 | invasive | Canada | V | 2012 | 531 | SRR1790813 |
| 1548 | NGBS68  | CC1 | invasive | Canada | V | 2010 | 1   | SRR1790814 |
| 1549 | NGBS8   | CC1 | invasive | Canada | V | 2009 | 1   | SRR1790815 |
| 1550 | NGBS9   | CC1 | invasive | Canada | V | 2010 | 1   | SRR1790816 |
| 1551 | NGBS92  | CC1 | invasive | Canada | V | 2010 | 1   | SRR1790817 |
| 1552 | NGBS93  | CC1 | invasive | Canada | V | 2010 | 1   | SRR1790818 |
| 1553 | NGBS94  | CC1 | invasive | Canada | V | 2010 | 1   | SRR1790819 |
| 1554 | NGBS99  | CC1 | invasive | Canada | V | 2010 | 1   | SRR1790820 |
| 1555 | SS100   | CC1 | invasive | USA    | V | 2006 | 1   | SRR2981531 |
| 1556 | SS102   | CC1 | invasive | USA    | V | 2006 | 1   | SRR2981532 |
| 1557 | SS103   | CC1 | invasive | USA    | V | 2006 | 1   | SRR2981533 |
| 1558 | SS104   | CC1 | invasive | USA    | V | 2006 | 1   | SRR2981534 |
| 1560 | SS106   | CC1 | invasive | USA    | V | 2006 | 1   | SRR2981536 |
| 1561 | SS107   | CC1 | invasive | USA    | V | 2006 | 1   | SRR2981537 |
| 1562 | SS108   | CC1 | invasive | USA    | V | 2006 | 872 | SRR2981538 |
| 1563 | SS109   | CC1 | invasive | USA    | V | 2006 | 1   | SRR2981539 |
| 1564 | SS110   | CC1 | invasive | USA    | V | 2007 | 1   | SRR2981540 |
| 1565 | SS111   | CC1 | invasive | USA    | V | 2007 | 1   | SRR2981541 |
| 1566 | SS114   | CC1 | invasive | USA    | V | 2007 | 1   | SRR2981542 |
| 1567 | SS115   | CC1 | invasive | USA    | V | 2007 | 1   | SRR2981543 |
| 1568 | SS116   | CC1 | invasive | USA    | V | 2007 | 1   | SRR2981544 |
| 1570 | SS119   | CC1 | invasive | USA    | V | 2008 | 1   | SRR2981546 |
| 1571 | SS120   | CC1 | invasive | USA    | V | 2008 | 1   | SRR2981547 |
| 1572 | SS122   | CC1 | invasive | USA    | V | 2009 | 1   | SRR2981548 |
| 1573 | SS125   | CC1 | invasive | USA    | V | 2009 | 1   | SRR2981549 |
| 1574 | SS126   | CC1 | invasive | USA    | V | 2009 | 1   | SRR2981550 |
| 1575 | SS127   | CC1 | invasive | USA    | V | 2009 | 1   | SRR2981551 |
| 1576 | SS129   | CC1 | invasive | USA    | V | 2009 | 1   | SRR2981552 |
| 1577 | SS132   | CC1 | invasive | USA    | V | 2009 | 1   | SRR2981553 |
| 1578 | SS133   | CC1 | invasive | USA    | V | 2009 | 1   | SRR2981554 |
| 1579 | SS135   | CC1 | invasive | USA    | V | 2007 | 1   | SRR2981555 |
| 1580 | SS136   | CC1 | invasive | USA    | V | 2007 | 297 | SRR2981556 |
| 1581 | SS138   | CC1 | invasive | USA    | V | 2010 | 1   | SRR2981557 |
| 1582 | SS140   | CC1 | invasive | USA    | V | 2008 | 1   | SRR2981558 |
| 1583 | SS141   | CC1 | invasive | USA    | V | 2009 | 1   | SRR2981559 |
| 1584 | SS143   | CC1 | invasive | USA    | V | 2010 | 1   | SRR2981560 |
| 1585 | SS144   | CC1 | invasive | USA    | V | 2010 | 1   | SRR2981561 |
| 1586 | SS145   | CC1 | invasive | USA    | V | 2010 | 1   | SRR2981562 |
| 1587 | SS146   | CC1 | invasive | USA    | V | 2010 | 1   | SRR2981563 |
| 1588 | SS147   | CC1 | invasive | USA    | V | 2010 | 1   | SRR2981564 |
| 1589 | SS148   | CC1 | invasive | USA    | V | 2011 | 1   | SRR2981565 |
| 1590 | SS150   | CC1 | invasive | USA    | V | 2012 | 1   | SRR2981566 |
| 1591 | SS151   | CC1 | invasive | USA    | V | 2012 | 1   | SRR2981567 |
| 1592 | SS152   | CC1 | invasive | USA    | V | 2012 | 1   | SRR2981568 |
| 1593 | SS31    | CC1 | invasive | USA    | V | 1992 | 1   | SRR2981569 |
| 1594 | SS32    | CC1 | invasive | USA    | V | 1992 | 1   | SRR2981570 |
| 1595 | SS33    | CC1 | invasive | USA    | V | 1994 | 1   | SRR2981571 |
| 1596 | SS34    | CC1 | invasive | USA    | V | 1994 | 1   | SRR2981572 |
| 1597 | SS35    | CC1 | invasive | USA    | V | 1994 | 1   | SRR2981573 |
| 1598 | SS36    | CC1 | invasive | USA    | V | 1997 | 1   | SRR2981574 |
| 1599 | SS37    | CC1 | invasive | USA    | V | 1997 | 1   | SRR2981575 |
| 1600 | SS38    | CC1 | invasive | USA    | V | 1998 | 1   | SRR2981576 |
| 1601 | SS39    | CC1 | invasive | USA    | V | 1998 | 1   | SRR2981577 |

|      |         |      |          |        |     |      |     |            |
|------|---------|------|----------|--------|-----|------|-----|------------|
| 1602 | SS40    | CC1  | invasive | USA    | V   | 1998 | 1   | SRR2981578 |
| 1603 | SS41    | CC1  | invasive | USA    | V   | 1998 | 1   | SRR2981579 |
| 1604 | SS42    | CC1  | invasive | USA    | V   | 1998 | 1   | SRR2981580 |
| 1605 | SS43    | CC1  | invasive | USA    | V   | 1998 | 1   | SRR2981581 |
| 1606 | SS44    | CC1  | invasive | USA    | V   | 1999 | 1   | SRR2981582 |
| 1607 | SS45    | CC1  | invasive | USA    | V   | 1999 | 1   | SRR2981583 |
| 1608 | SS46    | CC1  | invasive | USA    | V   | 1999 | 1   | SRR2981584 |
| 1609 | SS47    | CC1  | invasive | USA    | V   | 2000 | 1   | SRR2981585 |
| 1610 | SS48    | CC1  | invasive | USA    | V   | 2000 | 1   | SRR2981586 |
| 1611 | SS49    | CC1  | invasive | USA    | V   | 2000 | 873 | SRR2981587 |
| 1612 | SS50    | CC1  | invasive | USA    | V   | 2000 | 1   | SRR2981588 |
| 1613 | SS51    | CC1  | invasive | USA    | V   | 2000 | 1   | SRR2981589 |
| 1614 | SS52    | CC1  | invasive | USA    | V   | 2000 | 1   | SRR2981590 |
| 1615 | SS53    | CC1  | invasive | USA    | V   | 2000 | 1   | SRR2981591 |
| 1616 | SS54    | CC1  | invasive | USA    | V   | 2001 | 1   | SRR2981592 |
| 1617 | SS56    | CC1  | invasive | USA    | V   | 2001 | 1   | SRR2981593 |
| 1618 | SS57    | CC1  | invasive | USA    | V   | 2001 | 1   | SRR2981594 |
| 1619 | SS58    | CC1  | invasive | USA    | V   | 2001 | 1   | SRR2981595 |
| 1620 | SS59    | CC1  | invasive | USA    | V   | 2001 | 1   | SRR2981596 |
| 1621 | SS60    | CC1  | invasive | USA    | V   | 2001 | 1   | SRR2981597 |
| 1622 | SS61    | CC1  | invasive | USA    | V   | 2002 | 1   | SRR2981598 |
| 1623 | SS62    | CC1  | invasive | USA    | V   | 2002 | 1   | SRR2981599 |
| 1624 | SS63    | CC1  | invasive | USA    | V   | 2002 | 1   | SRR2981600 |
| 1625 | SS64    | CC1  | invasive | USA    | V   | 2002 | 1   | SRR2981601 |
| 1626 | SS65    | CC1  | invasive | USA    | V   | 2002 | 1   | SRR2981602 |
| 1627 | SS66    | CC1  | invasive | USA    | V   | 2002 | 1   | SRR2981603 |
| 1628 | SS67    | CC1  | invasive | USA    | V   | 2002 | 1   | SRR2981604 |
| 1629 | SS68    | CC1  | invasive | USA    | V   | 2003 | 1   | SRR2981605 |
| 1630 | SS69    | CC1  | invasive | USA    | V   | 2003 | 1   | SRR2981606 |
| 1632 | SS71    | CC1  | invasive | USA    | V   | 2003 | 1   | SRR2981608 |
| 1633 | SS72    | CC1  | invasive | USA    | V   | 2003 | 1   | SRR2981609 |
| 1634 | SS74    | CC1  | invasive | USA    | V   | 2004 | 1   | SRR2981610 |
| 1635 | SS75    | CC1  | invasive | USA    | V   | 2004 | 1   | SRR2981611 |
| 1636 | SS76    | CC1  | invasive | USA    | V   | 2004 | 1   | SRR2981612 |
| 1637 | SS77    | CC1  | invasive | USA    | V   | 2004 | 1   | SRR2981613 |
| 1638 | SS78    | CC1  | invasive | USA    | V   | 2004 | 1   | SRR2981614 |
| 1639 | SS79    | CC1  | invasive | USA    | V   | 2004 | 153 | SRR2981615 |
| 1640 | SS80    | CC1  | invasive | USA    | V   | 2004 | 1   | SRR2981616 |
| 1641 | SS81    | CC1  | invasive | USA    | V   | 2004 | 1   | SRR2981617 |
| 1642 | SS82    | CC1  | invasive | USA    | V   | 2004 | 1   | SRR2981618 |
| 1643 | SS83    | CC1  | invasive | USA    | V   | 2004 | 1   | SRR2981619 |
| 1644 | SS84    | CC1  | invasive | USA    | V   | 2005 | 1   | SRR2981620 |
| 1645 | SS85    | CC1  | invasive | USA    | V   | 2005 | 1   | SRR2981621 |
| 1646 | SS86    | CC1  | invasive | USA    | V   | 2005 | 1   | SRR2981622 |
| 1647 | SS87    | CC1  | invasive | USA    | V   | 2005 | 1   | SRR2981623 |
| 1648 | SS88    | CC1  | invasive | USA    | V   | 2005 | 1   | SRR2981624 |
| 1649 | SS89    | CC1  | invasive | USA    | V   | 2005 | 1   | SRR2981625 |
| 1650 | SS92    | CC1  | invasive | USA    | V   | 2005 | 1   | SRR2981626 |
| 1651 | SS93    | CC1  | invasive | USA    | V   | 2005 | 1   | SRR2981627 |
| 1652 | SS94    | CC1  | invasive | USA    | V   | 2005 | 1   | SRR2981628 |
| 1653 | SS95    | CC1  | invasive | USA    | V   | 2005 | 1   | SRR2981629 |
| 1654 | SS96    | CC1  | invasive | USA    | V   | 2005 | 1   | SRR2981630 |
| 1655 | SS97    | CC1  | invasive | USA    | V   | 2005 | 1   | SRR2981631 |
| 1656 | SS98    | CC1  | invasive | USA    | V   | 2005 | 1   | SRR2981632 |
| 1657 | NGBS003 | CC1  | invasive | Canada | III | 2009 | 2   | SRR2981633 |
| 1658 | NGBS050 | CC17 | invasive | Canada | III | 2010 | 17  | SRR2451874 |
| 1659 | NGBS069 | CC17 | invasive | Canada | III | 2010 | 17  | SRR2451875 |
| 1661 | NGBS079 | CC17 | invasive | Canada | III | 2010 | 17  | SRR2451877 |
| 1662 | NGBS082 | CC17 | invasive | Canada | III | 2010 | 17  | SRR2451879 |
| 1664 | NGBS126 | CC17 | invasive | Canada | III | 2010 | 17  | SRR2451883 |
| 1665 | NGBS128 | CC17 | invasive | Canada | III | 2010 | 17  | SRR2451884 |
| 1666 | NGBS169 | CC17 | invasive | Canada | III | 2010 | 17  | SRR2451892 |

|      |         |            |          |          |       |      |      |            |
|------|---------|------------|----------|----------|-------|------|------|------------|
| 1667 | NGBS186 | CC17       | invasive | Canada   | III   | 2010 | 17   | SRR2451893 |
| 1668 | NGBS205 | CC17       | invasive | Canada   | III   | 2011 | 17   | SRR2451894 |
| 1669 | NGBS220 | CC17       | invasive | Canada   | III   | 2011 | 17   | SRR2451895 |
| 1670 | NGBS222 | CC17       | invasive | Canada   | III   | 2010 | 17   | SRR2451896 |
| 1671 | NGBS238 | CC17       | invasive | Canada   | III   | 2011 | 17   | SRR2451897 |
| 1672 | NGBS239 | CC17       | invasive | Canada   | III   | 2011 | 17   | SRR2451898 |
| 1673 | NGBS250 | CC17       | invasive | Canada   | III   | 2011 | 17   | SRR2451899 |
| 1675 | NGBS277 | CC17       | invasive | Canada   | III   | 2010 | 17   | SRR2451901 |
| 1676 | NGBS282 | CC17       | invasive | Canada   | III   | 2010 | 17   | SRR2451902 |
| 1677 | NGBS291 | CC17       | invasive | Canada   | III   | 2010 | 17   | SRR2451903 |
| 1678 | NGBS296 | CC17       | invasive | Canada   | III   | 2010 | 17   | SRR2451904 |
| 1679 | NGBS297 | CC17       | invasive | Canada   | III   | 2010 | 17   | SRR2451905 |
| 1680 | NGBS299 | CC17       | invasive | Canada   | III   | 2011 | 17   | SRR2451906 |
| 1681 | NGBS306 | CC17       | invasive | Canada   | III   | 2011 | 17   | SRR2451907 |
| 1682 | NGBS312 | CC17       | invasive | Canada   | III   | 2011 | 17   | SRR2451908 |
| 1683 | NGBS318 | CC17       | invasive | Canada   | III   | 2011 | 290  | SRR2451910 |
| 1684 | NGBS327 | CC17       | invasive | Canada   | III   | 2011 | 484  | SRR2451911 |
| 1686 | NGBS345 | CC17       | invasive | Canada   | III   | 2011 | 874  | SRR2451913 |
| 1687 | NGBS356 | CC17       | invasive | Canada   | III   | 2011 | 17   | SRR2451914 |
| 1688 | NGBS361 | CC17       | invasive | Canada   | III   | 2011 | 17   | SRR2451915 |
| 1689 | NGBS362 | CC17       | invasive | Canada   | III   | 2011 | 17   | SRR2451916 |
| 1690 | NGBS368 | CC17       | invasive | Canada   | III   | 2011 | 17   | SRR2451917 |
| 1692 | NGBS374 | CC17       | invasive | Canada   | III   | 2011 | 17   | SRR2451919 |
| 1693 | NGBS377 | CC17       | invasive | Canada   | III   | 2011 | 17   | SRR2451920 |
| 1695 | NGBS398 | CC17       | invasive | Canada   | III   | 2011 | 17   | SRR2451922 |
| 1696 | NGBS403 | CC17       | invasive | Canada   | III   | 2011 | 17   | SRR2451923 |
| 1698 | NGBS421 | CC17       | invasive | Canada   | III   | 2011 | 17   | SRR2451925 |
| 1699 | NGBS422 | CC17       | invasive | Canada   | III   | 2011 | 17   | SRR2451926 |
| 1700 | NGBS431 | CC17       | invasive | Canada   | III   | 2011 | 17   | SRR2451927 |
| 1702 | NGBS456 | CC17       | invasive | Canada   | III   | 2011 | 17   | SRR2451929 |
| 1703 | NGBS464 | CC17       | invasive | Canada   | III   | 2011 | 17   | SRR2451930 |
| 1704 | NGBS469 | CC17       | invasive | Canada   | III   | 2011 | 17   | SRR2451931 |
| 1705 | NGBS470 | CC17       | invasive | Canada   | III   | 2011 | 17   | SRR2451932 |
| 1706 | NGBS483 | CC17       | invasive | Canada   | III   | 2011 | 17   | SRR2451933 |
| 1707 | NGBS485 | CC17       | invasive | Canada   | III   | 2011 | 17   | SRR2451934 |
| 1708 | NGBS486 | CC17       | invasive | Canada   | III   | 2011 | 17   | SRR2451935 |
| 1709 | NGBS500 | CC17       | invasive | Canada   | III   | 2012 | 17   | SRR2451936 |
| 1710 | NGBS501 | CC17       | invasive | Canada   | III   | 2012 | 17   | SRR2451937 |
| 1711 | NGBS502 | CC17       | invasive | Canada   | III   | 2012 | 95   | SRR2451938 |
| 1712 | NGBS515 | CC17       | invasive | Canada   | III   | 2012 | 17   | SRR2451939 |
| 1714 | NGBS531 | CC17       | invasive | Canada   | III   | 2012 | 148  | SRR2451941 |
| 1715 | NGBS534 | CC17       | invasive | Canada   | III   | 2012 | 17   | SRR2451942 |
| 1716 | NGBS551 | CC17       | invasive | Canada   | III   | 2012 | 17   | SRR2451943 |
| 1717 | NGBS583 | CC17       | invasive | Canada   | III   | 2012 | 17   | SRR2451945 |
| 1718 | NGBS593 | CC17       | invasive | Canada   | III   | 2012 | 17   | SRR2451946 |
| 1719 | NGBS594 | CC17       | invasive | Canada   | III   | 2012 | 17   | SRR2451947 |
| 1720 | NGBS596 | CC17       | invasive | Canada   | III   | 2012 | 17   | SRR2451948 |
| 1721 | NGBS607 | CC17       | invasive | Canada   | III   | 2012 | 17   | SRR2451949 |
| 1722 | NGBS608 | CC17       | invasive | Canada   | III   | 2012 | 17   | SRR2451950 |
| 1723 | NGBS609 | CC17       | invasive | Canada   | III   | 2012 | 17   | SRR2451951 |
| 1724 | NGBS613 | CC17       | invasive | Canada   | III   | 2012 | 17   | SRR2451952 |
| 1726 | NGBS618 | CC17       | invasive | Canada   | III   | 2012 | 17   | SRR2451954 |
| 1727 | NGBS622 | CC17       | invasive | Canada   | III   | 2012 | 148  | SRR2451955 |
| 1730 | NGBS632 | CC17       | invasive | Canada   | III   | 2012 | 17   | SRR2451958 |
| 1731 | NGBS636 | CC17       | invasive | Canada   | III   | 2010 | 17   | SRR2451959 |
| 1732 | NGBS641 | CC17       | invasive | Canada   | III   | 2010 | 17   | SRR2451960 |
| 1733 | NGBS644 | CC17       | invasive | Canada   | III   | 2011 | 17   | SRR2451961 |
| 1734 | NGBS650 | CC17       | invasive | Canada   | III   | 2011 | 17   | SRR2451962 |
| 1735 | NGBS44  | CC1        | invasive | Canada   | V     | 2010 | 1    | SRR1790791 |
| 1897 | K59213  | SRR3321197 | CC1      | invasive | Kenya | V    | 2012 | 1          |
| 1898 | K58722  | SRR3321196 | CC19     | invasive | Kenya | III  | 2012 | 182        |
| 1899 | K56677  | SRR3321195 | CC1      | invasive | Kenya | V    | 2012 | 1          |

|      |        |            |      |         |       |     |      |     |
|------|--------|------------|------|---------|-------|-----|------|-----|
| 1900 | K62205 | SRR3321194 | CC23 | carrier | Kenya | la  | 2013 | 23  |
| 1901 | K61856 | SRR3321193 | CC23 | carrier | Kenya | la  | 2013 | 23  |
| 1902 | K61593 | SRR3321192 | CC1  | carrier | Kenya | V   | 2013 | 1   |
| 1903 | K61569 | SRR3321191 | CC10 | carrier | Kenya | lb  | 2013 | 10  |
| 1904 | K61520 | SRR3321190 | CC17 | carrier | Kenya | III | 2013 | 484 |
| 1905 | K61337 | SRR3321189 | CC10 | carrier | Kenya | NT  | 2013 | 8   |
| 1906 | K61281 | SRR3321188 | CC1  | carrier | Kenya | V   | 2013 | 1   |
| 1907 | K61004 | SRR3321187 | CC17 | carrier | Kenya | III | 2013 | 17  |
| 1908 | K60927 | SRR3321186 | CC23 | carrier | Kenya | la  | 2013 | 23  |
| 1909 | K60926 | SRR3321185 | CC23 | carrier | Kenya | la  | 2013 | 23  |
| 1910 | K60802 | SRR3321184 | CC19 | carrier | Kenya | II  | 2013 | 28  |
| 1911 | K60691 | SRR3321183 | CC17 | carrier | Kenya | III | 2013 | 484 |
| 1912 | K59750 | SRR3321182 | CC17 | carrier | Kenya | III | 2012 | 484 |
| 1913 | K59732 | SRR3321181 | CC17 | carrier | Kenya | III | 2012 | 17  |
| 1914 | K59579 | SRR3321180 | CC10 | carrier | Kenya | lb  | 2012 | 8   |
| 1915 | K59519 | SRR3321179 | CC1  | carrier | Kenya | V   | 2012 | 1   |
| 1916 | K59497 | SRR3321178 | CC17 | carrier | Kenya | III | 2012 | 17  |
| 1917 | K59496 | SRR3321177 | CC10 | carrier | Kenya | lb  | 2012 | 10  |
| 1918 | K59380 | SRR3321176 | CC19 | carrier | Kenya | III | 2012 | 182 |
| 1919 | K59319 | SRR3321175 | CC1  | carrier | Kenya | V   | 2012 | 1   |
| 1920 | K59216 | SRR3321174 | CC17 | carrier | Kenya | III | 2012 | 17  |
| 1921 | K59112 | SRR3321173 | CC1  | carrier | Kenya | NT  | 2012 | 1   |
| 1922 | K58953 | SRR3321172 | CC1  | carrier | Kenya | V   | 2012 | 1   |
| 1923 | K58904 | SRR3321171 | CC1  | carrier | Kenya | V   | 2012 | 1   |
| 1924 | K58847 | SRR3321170 | CC1  | carrier | Kenya | V   | 2012 | 1   |
| 1925 | K58834 | SRR3321169 | CC23 | carrier | Kenya | la  | 2012 | 23  |
| 1926 | K58784 | SRR3321168 | CC17 | carrier | Kenya | III | 2012 | 17  |
| 1927 | K58759 | SRR3321167 | CC17 | carrier | Kenya | III | 2012 | 484 |
| 1928 | K58245 | SRR3321166 | CC17 | carrier | Kenya | III | 2012 | 17  |
| 1929 | K58244 | SRR3321165 | CC10 | carrier | Kenya | lb  | 2012 | 10  |
| 1930 | K57971 | SRR3321164 | CC10 | carrier | Kenya | II  | 2012 | 10  |
| 1931 | K57970 | SRR3321163 | CC10 | carrier | Kenya | lb  | 2012 | 8   |
| 1932 | K57879 | SRR3321162 | CC10 | carrier | Kenya | lb  | 2012 | 8   |
| 1933 | K57791 | SRR3321161 | CC10 | carrier | Kenya | II  | 2012 | 10  |
| 1934 | K57354 | SRR3321160 | CC17 | carrier | Kenya | III | 2012 | 17  |
| 1935 | K57353 | SRR3321159 | CC17 | carrier | Kenya | III | 2012 | 17  |
| 1936 | K57172 | SRR3321158 | CC1  | carrier | Kenya | VI  | 2012 | 14  |
| 1937 | K57063 | SRR3321157 | CC17 | carrier | Kenya | III | 2012 | 17  |
| 1938 | K56978 | SRR3321156 | CC19 | carrier | Kenya | III | 2012 | 182 |
| 1939 | K56941 | SRR3321155 | CC17 | carrier | Kenya | III | 2012 | 17  |
| 1940 | K56795 | SRR3321154 | CC23 | carrier | Kenya | la  | 2012 | 23  |
| 1941 | K56485 | SRR3321153 | CC17 | carrier | Kenya | III | 2012 | 786 |
| 1942 | K56441 | SRR3321152 | CC23 | carrier | Kenya | la  | 2012 | 23  |
| 1943 | K56376 | SRR3321151 | CC23 | carrier | Kenya | la  | 2012 | 23  |
| 1944 | K62060 | SRR3321150 | CC23 | carrier | Kenya | la  |      | 23  |
| 1945 | K61534 | SRR3321149 | CC10 | carrier | Kenya | lb  |      | 8   |
| 1946 | K60936 | SRR3321148 | CC1  | carrier | Kenya | V   |      | 1   |
| 1947 | K59565 | SRR3321147 | CC17 | carrier | Kenya | III |      | 17  |
| 1948 | K59185 | SRR3321146 | CC17 | carrier | Kenya | III |      | 17  |
| 1949 | K59069 | SRR3321145 | CC17 | carrier | Kenya | III |      | 484 |
| 1950 | K58241 | SRR3321144 | CC19 | carrier | Kenya | II  |      | 28  |
| 1951 | K57911 | SRR3321143 | CC17 | carrier | Kenya | III |      | 17  |
| 1952 | K57091 | SRR3321142 | CC19 | carrier | Kenya | V   |      | 327 |
| 1953 | K56940 | SRR3321141 | CC19 | carrier | Kenya | V   |      | 19  |
| 1954 | K56631 | SRR3321140 | CC1  | carrier | Kenya | V   |      | 1   |
| 1955 | K56368 | SRR3321139 | CC10 | carrier | Kenya | lb  |      | 8   |
| 1956 | K56068 | SRR3321138 | CC19 | carrier | Kenya | III |      | 182 |
| 1957 | K52047 | SRR3321137 | CC23 | carrier | Kenya | la  |      | 23  |
| 1958 | K51025 | SRR3321136 | CC1  | carrier | Kenya | V   |      | 1   |
| 1959 | K49737 | SRR3321135 | CC23 | carrier | Kenya | la  |      | 23  |
| 1960 | K31131 | SRR3321134 | CC17 | carrier | Kenya | III |      | 17  |
| 1961 | K62585 | SRR3321133 | CC23 | carrier | Kenya | la  | 2013 | 23  |

|      |        |            |      |         |       |     |      |     |
|------|--------|------------|------|---------|-------|-----|------|-----|
| 1962 | K62584 | SRR3321132 | CC19 | carrier | Kenya | V   | 2013 | 19  |
| 1963 | K62583 | SRR3321131 | CC17 | carrier | Kenya | III | 2013 | 17  |
| 1964 | K62582 | SRR3321130 | CC17 | carrier | Kenya | III | 2013 | 17  |
| 1965 | K62581 | SRR3321129 | CC10 | carrier | Kenya | Ib  | 2013 | 10  |
| 1966 | K62580 | SRR3321128 | CC23 | carrier | Kenya | Ia  | 2013 | 23  |
| 1967 | K62570 | SRR3321127 | CC23 | carrier | Kenya | Ia  | 2013 | 23  |
| 1968 | K62569 | SRR3321126 | CC17 | carrier | Kenya | III | 2013 | 17  |
| 1969 | K62567 | SRR3321125 | CC23 | carrier | Kenya | Ia  | 2013 | 23  |
| 1970 | K62558 | SRR3321124 | CC17 | carrier | Kenya | IV  | 2013 | 291 |
| 1971 | K62557 | SRR3321123 | CC19 | carrier | Kenya | III | 2013 | 19  |
| 1972 | K62556 | SRR3321122 | CC23 | carrier | Kenya | Ia  | 2013 | 23  |
| 1973 | K62554 | SRR3321121 | CC17 | carrier | Kenya | III | 2013 | 17  |
| 1974 | K62534 | SRR3321120 | CC23 | carrier | Kenya | Ia  | 2013 | 23  |
| 1975 | K62476 | SRR3321119 | CC17 | carrier | Kenya | III | 2013 | 17  |
| 1976 | K62475 | SRR3321118 | CC17 | carrier | Kenya | III | 2013 | 484 |
| 1977 | K62474 | SRR3321117 | CC17 | carrier | Kenya | III | 2013 | 17  |
| 1978 | K62464 | SRR3321116 | CC17 | carrier | Kenya | III | 2013 | 17  |
| 1979 | K62463 | SRR3321115 | CC10 | carrier | Kenya | Ib  | 2013 | 10  |
| 1980 | K62462 | SRR3321114 | CC10 | carrier | Kenya | Ib  | 2013 | 10  |
| 1981 | K62461 | SRR3321113 | CC23 | carrier | Kenya | Ia  | 2013 | 23  |
| 1982 | K62460 | SRR3321112 | CC1  | carrier | Kenya | V   | 2013 | 1   |
| 1983 | K62459 | SRR3321111 | CC17 | carrier | Kenya | III | 2013 | 484 |
| 1984 | K62446 | SRR3321110 | CC23 | carrier | Kenya | Ia  | 2013 | 23  |
| 1985 | K62445 | SRR3321109 | CC23 | carrier | Kenya | Ia  | 2013 | 23  |
| 1986 | K62444 | SRR3321108 | CC23 | carrier | Kenya | V   | 2013 | 23  |
| 1987 | K62419 | SRR3321107 | CC23 | carrier | Kenya | Ia  | 2013 | 23  |
| 1988 | K62418 | SRR3321106 | CC17 | carrier | Kenya | III | 2013 | 17  |
| 1989 | K62393 | SRR3321105 | CC17 | carrier | Kenya | III | 2013 | 17  |
| 1990 | K62392 | SRR3321104 | CC19 | carrier | Kenya | V   | 2013 | 328 |
| 1991 | K62350 | SRR3321103 | CC10 | carrier | Kenya | Ib  | 2013 | 10  |
| 1992 | K62349 | SRR3321102 | CC17 | carrier | Kenya | III | 2013 | 484 |
| 1993 | K62348 | SRR3321101 | CC17 | carrier | Kenya | III | 2013 | 17  |
| 1994 | K62347 | SRR3321100 | CC19 | carrier | Kenya | III | 2013 | 19  |
| 1995 | K62313 | SRR3321099 | CC17 | carrier | Kenya | III | 2013 | 17  |
| 1996 | K62312 | SRR3321098 | CC23 | carrier | Kenya | Ia  | 2013 | 23  |
| 1997 | K62311 | SRR3321097 | CC1  | carrier | Kenya | V   | 2013 | 1   |
| 1998 | K62252 | SRR3321096 | CC19 | carrier | Kenya | V   | 2013 | 19  |
| 1999 | K62251 | SRR3321095 | CC19 | carrier | Kenya | III | 2013 | 182 |
| 2000 | K62250 | SRR3321094 | CC17 | carrier | Kenya | III | 2013 | 484 |
| 2001 | K62249 | SRR3321093 | CC19 | carrier | Kenya | V   | 2013 | 327 |
| 2002 | K62210 | SRR3321092 | CC1  | carrier | Kenya | V   | 2013 | 1   |
| 2003 | K62209 | SRR3321091 | N/D  | carrier | Kenya | Ib  | 2013 | 3   |
| 2004 | K62208 | SRR3321090 | CC1  | carrier | Kenya | V   | 2013 | 1   |
| 2005 | K62207 | SRR3321089 | CC19 | carrier | Kenya | V   | 2013 | 19  |
| 2006 | K62204 | SRR3321088 | CC23 | carrier | Kenya | Ia  | 2013 | 23  |
| 2007 | K62170 | SRR3321087 | CC10 | carrier | Kenya | Ib  | 2013 | 8   |
| 2008 | K62168 | SRR3321086 | CC17 | carrier | Kenya | III | 2013 | 17  |
| 2009 | K62167 | SRR3321085 | CC1  | carrier | Kenya | V   | 2013 | 1   |
| 2010 | K62165 | SRR3321084 | CC1  | carrier | Kenya | V   | 2013 | 1   |
| 2011 | K62164 | SRR3321083 | CC19 | carrier | Kenya | III | 2013 | 19  |
| 2012 | K62157 | SRR3321082 | N/D  | carrier | Kenya | Ia  | 2013 | 103 |
| 2013 | K62156 | SRR3321081 | CC17 | carrier | Kenya | III | 2013 | 17  |
| 2014 | K62155 | SRR3321080 | CC1  | carrier | Kenya | V   | 2013 | 1   |
| 2015 | K62154 | SRR3321079 | CC17 | carrier | Kenya | III | 2013 | 17  |
| 2016 | K62153 | SRR3321078 | CC17 | carrier | Kenya | III | 2013 | 17  |
| 2017 | K62152 | SRR3321077 | CC23 | carrier | Kenya | Ia  | 2013 | 23  |
| 2018 | K62151 | SRR3321076 | CC10 | carrier | Kenya | Ib  | 2013 | 8   |
| 2019 | K62145 | SRR3321075 | CC17 | carrier | Kenya | III | 2013 | 801 |
| 2020 | K62144 | SRR3321074 | CC1  | carrier | Kenya | V   | 2013 | 1   |
| 2021 | K62143 | SRR3321073 | CC17 | carrier | Kenya | III | 2013 | 484 |
| 2022 | K62142 | SRR3321072 | CC17 | carrier | Kenya | III | 2013 | 484 |
| 2023 | K62111 | SRR3321071 | CC1  | carrier | Kenya | V   | 2013 | 1   |



|      |        |            |      |         |       |     |      |     |
|------|--------|------------|------|---------|-------|-----|------|-----|
| 2024 | K62110 | SRR3321070 | CC17 | carrier | Kenya | III | 2013 | 17  |
| 2025 | K62080 | SRR3321069 | CC17 | carrier | Kenya | III | 2013 | 17  |
| 2026 | K62079 | SRR3321068 | CC17 | carrier | Kenya | III | 2013 | 17  |
| 2027 | K62064 | SRR3321067 | CC10 | carrier | Kenya | II  | 2013 | 10  |
| 2028 | K62063 | SRR3321066 | CC19 | carrier | Kenya | III | 2013 | 182 |
| 2029 | K62062 | SRR3321065 | CC23 | carrier | Kenya | Ia  | 2013 | 23  |
| 2030 | K62044 | SRR3321064 | CC1  | carrier | Kenya | V   | 2013 | 1   |
| 2031 | K62043 | SRR3321063 | CC17 | carrier | Kenya | III | 2013 | 17  |
| 2032 | K62042 | SRR3321062 | CC17 | carrier | Kenya | III | 2013 | 17  |
| 2033 | K62032 | SRR3321061 | CC17 | carrier | Kenya | III | 2013 | 17  |
| 2034 | K62031 | SRR3321060 | CC10 | carrier | Kenya | Ib  | 2013 | 10  |
| 2035 | K62030 | SRR3321059 | CC10 | carrier | Kenya | Ib  | 2013 | 10  |
| 2036 | K62029 | SRR3321058 | CC19 | carrier | Kenya | II  | 2013 | 28  |
| 2037 | K62026 | SRR3321057 | CC10 | carrier | Kenya | Ib  | 2013 | 10  |
| 2038 | K62025 | SRR3321056 | CC17 | carrier | Kenya | III | 2013 | 17  |
| 2039 | K61994 | SRR3321055 | CC17 | carrier | Kenya | III | 2013 | 17  |
| 2040 | K61855 | SRR3321054 | CC19 | carrier | Kenya | V   | 2013 | 327 |
| 2041 | K61845 | SRR3321053 | CC17 | carrier | Kenya | III | 2013 | 17  |
| 2042 | K61844 | SRR3321052 | CC17 | carrier | Kenya | III | 2013 | 17  |
| 2043 | K61843 | SRR3321051 | CC19 | carrier | Kenya | III | 2013 | 19  |
| 2044 | K61842 | SRR3321050 | CC10 | carrier | Kenya | II  | 2013 | 10  |
| 2045 | K61841 | SRR3321049 | CC17 | carrier | Kenya | III | 2013 | 17  |
| 2046 | K61840 | SRR3321048 | CC17 | carrier | Kenya | III | 2013 | 17  |
| 2047 | K61832 | SRR3321047 | CC17 | carrier | Kenya | III | 2013 | 17  |
| 2048 | K61823 | SRR3321046 | CC19 | carrier | Kenya | V   | 2013 | 19  |
| 2049 | K61781 | SRR3321045 | CC10 | carrier | Kenya | Ib  | 2013 | 10  |
| 2050 | K61780 | SRR3321044 | CC23 | carrier | Kenya | Ia  | 2013 | 23  |
| 2051 | K61773 | SRR3321043 | CC19 | carrier | Kenya | II  | 2013 | 28  |
| 2052 | K61772 | SRR3321042 | CC23 | carrier | Kenya | Ia  | 2013 | 23  |
| 2053 | K61771 | SRR3321041 | CC23 | carrier | Kenya | Ia  | 2013 | 23  |
| 2054 | K61768 | SRR3321040 | CC23 | carrier | Kenya | Ia  | 2013 | 23  |
| 2055 | K61767 | SRR3321039 | CC17 | carrier | Kenya | III | 2013 | 484 |
| 2056 | K61766 | SRR3321038 | CC10 | carrier | Kenya | V   | 2013 | 12  |
| 2057 | K61765 | SRR3321037 | CC10 | carrier | Kenya | V   | 2013 | 12  |
| 2058 | K61764 | SRR3321036 | CC10 | carrier | Kenya | II  | 2013 | 10  |
| 2059 | K61763 | SRR3321035 | CC17 | carrier | Kenya | III | 2013 | 17  |
| 2060 | K61749 | SRR3321034 | CC19 | carrier | Kenya | II  | 2013 | 28  |
| 2061 | K61748 | SRR3321033 | CC19 | carrier | Kenya | III | 2013 | 182 |
| 2062 | K61747 | SRR3321032 | CC23 | carrier | Kenya | V   | 2013 | 23  |
| 2063 | K61746 | SRR3321031 | CC23 | carrier | Kenya | Ia  | 2013 | 23  |
| 2064 | K61739 | SRR3321030 | CC23 | carrier | Kenya | Ia  | 2013 | 23  |
| 2065 | K61733 | SRR3321029 | CC23 | carrier | Kenya | Ia  | 2013 | 23  |
| 2066 | K61732 | SRR3321028 | CC1  | carrier | Kenya | V   | 2013 | 1   |
| 2067 | K61731 | SRR3321027 | CC17 | carrier | Kenya | III | 2013 | 17  |
| 2068 | K61730 | SRR3321026 | CC23 | carrier | Kenya | Ia  | 2013 | 23  |
| 2069 | K61729 | SRR3321025 | CC19 | carrier | Kenya | V   | 2013 | 19  |
| 2070 | K61725 | SRR3321024 | CC19 | carrier | Kenya | II  | 2013 | 28  |
| 2071 | K61704 | SRR3321023 | CC17 | carrier | Kenya | III | 2013 | 484 |
| 2072 | K61692 | SRR3321022 | CC19 | carrier | Kenya | II  | 2013 | 28  |
| 2073 | K61691 | SRR3321021 | CC23 | carrier | Kenya | Ia  | 2013 | 23  |
| 2074 | K61690 | SRR3321020 | CC1  | carrier | Kenya | V   | 2013 | 1   |
| 2075 | K61689 | SRR3321019 | CC23 | carrier | Kenya | Ia  | 2013 | 23  |
| 2076 | K61688 | SRR3321018 | CC17 | carrier | Kenya | III | 2013 | 109 |
| 2077 | K61685 | SRR3321017 | CC1  | carrier | Kenya | V   | 2013 | 1   |
| 2078 | K61684 | SRR3321016 | CC19 | carrier | Kenya | III | 2013 | 182 |
| 2079 | K61683 | SRR3321015 | CC23 | carrier | Kenya | Ia  |      | 23  |
| 2080 | K61670 | SRR3321014 | CC1  | carrier | Kenya | V   | 2013 | 1   |
| 2081 | K61669 | SRR3321013 | CC23 | carrier | Kenya | Ia  | 2013 | 23  |
| 2082 | K61668 | SRR3321012 | CC23 | carrier | Kenya | Ia  | 2013 | 23  |
| 2083 | K61640 | SRR3321011 | CC17 | carrier | Kenya | III | 2013 | 17  |
| 2084 | K61639 | SRR3321010 | CC17 | carrier | Kenya | III | 2013 | 17  |
| 2085 | K61622 | SRR3321009 | CC10 | carrier | Kenya | II  | 2013 | 10  |

|      |        |            |      |         |       |     |      |     |  |
|------|--------|------------|------|---------|-------|-----|------|-----|--|
| 2086 | K61620 | SRR3321008 | CC17 | carrier | Kenya | III | 2013 | 17  |  |
| 2087 | K61618 | SRR3321007 | CC10 | carrier | Kenya | II  | 2013 | 10  |  |
| 2088 | K61611 | SRR3321006 | CC17 | carrier | Kenya | III | 2013 | 17  |  |
| 2089 | K61610 | SRR3321005 | CC23 | carrier | Kenya | Ia  | 2013 | 23  |  |
| 2090 | K61608 | SRR3321004 | CC17 | carrier | Kenya | III | 2013 | 17  |  |
| 2091 | K61606 | SRR3321003 | CC19 | carrier | Kenya | II  | 2013 | 28  |  |
| 2092 | K61594 | SRR3321002 | CC17 | carrier | Kenya | III | 2013 | 484 |  |
| 2093 | K61592 | SRR3321001 | CC10 | carrier | Kenya | II  | 2013 | 10  |  |
| 2094 | K61591 | SRR3321000 | CC1  | carrier | Kenya | II  | 2013 | 2   |  |
| 2095 | K61590 | SRR3320999 | CC17 | carrier | Kenya | III | 2013 | 17  |  |
| 2096 | K61589 | SRR3320998 | N/D  | carrier | Kenya | Ia  | 2013 | 798 |  |
| 2097 | K61586 | SRR3320997 | CC17 | carrier | Kenya | III | 2013 | 484 |  |
| 2098 | K61572 | SRR3320996 | CC17 | carrier | Kenya | III | 2013 | 17  |  |
| 2099 | K61571 | SRR3320995 | CC23 | carrier | Kenya | Ia  | 2013 | 23  |  |
| 2100 | K61533 | SRR3320994 | CC10 | carrier | Kenya | Ib  | 2013 | 10  |  |
| 2101 | K61521 | SRR3320993 | CC17 | carrier | Kenya | III | 2013 | 17  |  |
| 2102 | K61516 | SRR3320992 | CC17 | carrier | Kenya | III | 2013 | 17  |  |
| 2103 | K61515 | SRR3320991 | CC10 | carrier | Kenya | Ib  | 2013 | 8   |  |
| 2104 | K61514 | SRR3320990 | CC17 | carrier | Kenya | III | 2013 | 484 |  |
| 2105 | K61512 | SRR3320989 | CC19 | carrier | Kenya | V   | 2013 | 327 |  |
| 2106 | K61491 | SRR3320988 | N/D  | carrier | Kenya | Ib  | 2013 |     |  |
| 2107 | K61481 | SRR3320987 | CC19 | carrier | Kenya | V   | 2013 | 327 |  |
| 2108 | K61465 | SRR3320986 | CC19 | carrier | Kenya | III | 2013 | 182 |  |
| 2109 | K61464 | SRR3320985 | CC10 | carrier | Kenya | Ib  | 2013 | 797 |  |
| 2110 | K61463 | SRR3320984 | CC10 | carrier | Kenya | II  | 2013 | 10  |  |
| 2111 | K61461 | SRR3320983 | CC17 | carrier | Kenya | III | 2013 | 484 |  |
| 2112 | K61460 | SRR3320982 | CC19 | carrier | Kenya | III | 2013 | 182 |  |
| 2113 | K61459 | SRR3320981 | CC23 | carrier | Kenya | Ia  | 2013 | 23  |  |
| 2114 | K61457 | SRR3320980 | CC10 | carrier | Kenya | Ib  | 2013 | 10  |  |
| 2115 | K61438 | SRR3320979 | CC23 | carrier | Kenya | Ia  | 2013 | 23  |  |
| 2116 | K61437 | SRR3320978 | CC10 | carrier | Kenya | Ib  | 2013 | 8   |  |
| 2117 | K61436 | SRR3320977 | CC10 | carrier | Kenya | Ib  | 2013 | 10  |  |
| 2118 | K61435 | SRR3320976 | CC17 | carrier | Kenya | III | 2013 | 17  |  |
| 2119 | K61434 | SRR3320975 | CC1  | carrier | Kenya | V   | 2013 | 1   |  |
| 2120 | K61432 | SRR3320974 | CC10 | carrier | Kenya | Ib  | 2013 | 10  |  |
| 2121 | K61431 | SRR3320973 | CC17 | carrier | Kenya | III | 2013 | 790 |  |
| 2122 | K61428 | SRR3320972 | CC23 | carrier | Kenya | Ia  | 2013 | 23  |  |
| 2123 | K61416 | SRR3320971 | CC10 | carrier | Kenya | Ib  | 2013 | 10  |  |
| 2124 | K61415 | SRR3320970 | CC17 | carrier | Kenya | III | 2013 | 484 |  |
| 2125 | K61414 | SRR3320969 | CC23 | carrier | Kenya | Ia  | 2013 | 23  |  |
| 2126 | K61407 | SRR3320968 | CC17 | carrier | Kenya | III | 2013 | 484 |  |
| 2127 | K61395 | SRR3320967 | CC23 | carrier | Kenya | Ia  | 2013 | 23  |  |
| 2128 | K61394 | SRR3320966 | CC23 | carrier | Kenya | Ia  | 2013 | 23  |  |
| 2129 | K61381 | SRR3320965 | CC1  | carrier | Kenya | V   | 2013 | 1   |  |
| 2130 | K61379 | SRR3320964 | CC23 | carrier | Kenya | Ia  | 2013 | 23  |  |
| 2131 | K61378 | SRR3320963 | CC10 | carrier | Kenya | Ib  | 2013 | 10  |  |
| 2132 | K61363 | SRR3320962 | CC23 | carrier | Kenya | Ia  | 2013 | 23  |  |
| 2133 | K61362 | SRR3320961 | CC17 | carrier | Kenya | III | 2013 | 17  |  |
| 2134 | K61361 | SRR3320960 | CC10 | carrier | Kenya | Ib  | 2013 | 10  |  |
| 2135 | K61360 | SRR3320959 | CC1  | carrier | Kenya | V   | 2013 | 796 |  |
| 2136 | K61359 | SRR3320958 | CC10 | carrier | Kenya | II  | 2013 | 10  |  |
| 2137 | K61342 | SRR3320957 | CC19 | carrier | Kenya | II  | 2013 | 28  |  |
| 2138 | K61341 | SRR3320956 | CC23 | carrier | Kenya | V   | 2013 | 24  |  |
| 2139 | K61336 | SRR3320955 | CC17 | carrier | Kenya | III | 2013 | 484 |  |
| 2140 | K61335 | SRR3320954 | CC17 | carrier | Kenya | III | 2013 | 17  |  |
| 2141 | K61334 | SRR3320953 | CC23 | carrier | Kenya | Ia  | 2013 | 23  |  |
| 2142 | K61331 | SRR3320952 | CC17 | carrier | Kenya | III | 2013 | 17  |  |
| 2143 | K61330 | SRR3320951 | CC10 | carrier | Kenya | Ib  | 2013 | 8   |  |
| 2144 | K61329 | SRR3320950 | CC10 | carrier | Kenya | Ib  | 2013 | 10  |  |
| 2145 | K61328 | SRR3320949 | CC23 | carrier | Kenya | Ia  | 2013 | 23  |  |
| 2146 | K61308 | SRR3320948 | CC19 | carrier | Kenya | V   | 2013 | 328 |  |
| 2147 | K61307 | SRR3320947 | CC1  | carrier | Kenya | IV  | 2013 | 196 |  |

|      |        |            |      |         |       |     |      |     |
|------|--------|------------|------|---------|-------|-----|------|-----|
| 2148 | K61306 | SRR3320946 | CC10 | carrier | Kenya | Ib  | 2013 | 8   |
| 2149 | K61305 | SRR3320945 | CC17 | carrier | Kenya | III | 2013 | 17  |
| 2150 | K61304 | SRR3320944 | CC23 | carrier | Kenya | Ia  | 2013 | 23  |
| 2151 | K61282 | SRR3320943 | CC17 | carrier | Kenya | III | 2013 | 17  |
| 2152 | K61280 | SRR3320942 | CC17 | carrier | Kenya | III | 2013 | 484 |
| 2153 | K61279 | SRR3320941 | CC1  | carrier | Kenya | V   | 2013 | 1   |
| 2154 | K61278 | SRR3320940 | CC23 | carrier | Kenya | Ia  | 2013 | 23  |
| 2155 | K61276 | SRR3320939 | CC17 | carrier | Kenya | III | 2013 | 17  |
| 2156 | K61270 | SRR3320938 | CC19 | carrier | Kenya | V   | 2013 | 19  |
| 2157 | K61269 | SRR3320937 | CC23 | carrier | Kenya | Ia  | 2013 | 23  |
| 2158 | K61265 | SRR3320936 | CC10 | carrier | Kenya | Ib  | 2013 | 8   |
| 2159 | K61263 | SRR3320935 | CC1  | carrier | Kenya | V   | 2013 | 1   |
| 2160 | K61261 | SRR3320934 | CC1  | carrier | Kenya | II  | 2013 | 2   |
| 2161 | K61259 | SRR3320933 | CC10 | carrier | Kenya | Ib  | 2013 | 8   |
| 2162 | K61258 | SRR3320932 | CC23 | carrier | Kenya | Ia  | 2013 | 23  |
| 2163 | K61256 | SRR3320931 | CC10 | carrier | Kenya | Ib  | 2013 | 8   |
| 2164 | K61255 | SRR3320930 | CC19 | carrier | Kenya | III | 2013 | 182 |
| 2165 | K61252 | SRR3320929 | CC17 | carrier | Kenya | III | 2013 | 484 |
| 2166 | K61251 | SRR3320928 | CC17 | carrier | Kenya | III | 2013 | 17  |
| 2167 | K61250 | SRR3320927 | CC19 | carrier | Kenya | III | 2013 | 182 |
| 2168 | K61236 | SRR3320926 | CC1  | carrier | Kenya | V   | 2013 | 1   |
| 2169 | K61235 | SRR3320925 | CC1  | carrier | Kenya | II  | 2013 | 2   |
| 2170 | K61223 | SRR3320924 | CC23 | carrier | Kenya | Ia  | 2013 | 23  |
| 2171 | K61219 | SRR3320923 | CC1  | carrier | Kenya | II  | 2013 | 2   |
| 2172 | K61211 | SRR3320922 | CC23 | carrier | Kenya | Ia  | 2013 | 23  |
| 2173 | K61196 | SRR3320921 | CC23 | carrier | Kenya | Ia  | 2013 | 23  |
| 2174 | K61194 | SRR3320920 | CC23 | carrier | Kenya | V   | 2013 | 23  |
| 2175 | K61193 | SRR3320919 | CC23 | carrier | Kenya | Ia  | 2013 | 24  |
| 2176 | K61192 | SRR3320918 | CC19 | carrier | Kenya | III | 2013 | 182 |
| 2177 | K61191 | SRR3320917 | CC23 | carrier | Kenya | Ia  | 2013 | 23  |
| 2178 | K61177 | SRR3320916 | CC17 | carrier | Kenya | III | 2013 | 484 |
| 2179 | K61175 | SRR3320915 | CC23 | carrier | Kenya | Ia  | 2013 | 23  |
| 2180 | K61164 | SRR3320914 | CC17 | carrier | Kenya | III | 2013 | 484 |
| 2181 | K61163 | SRR3320913 | CC19 | carrier | Kenya | V   | 2013 | 328 |
| 2182 | K61143 | SRR3320912 | CC1  | carrier | Kenya | IV  | 2013 | 196 |
| 2183 | K61142 | SRR3320911 | CC1  | carrier | Kenya | IV  | 2013 | 196 |
| 2184 | K61141 | SRR3320910 | CC10 | carrier | Kenya | II  | 2013 | 10  |
| 2185 | K61138 | SRR3320909 | N/D  | carrier | Kenya | V   | 2013 |     |
| 2186 | K61119 | SRR3320908 | CC19 | carrier | Kenya | III | 2013 | 182 |
| 2187 | K61118 | SRR3320907 | CC19 | carrier | Kenya | III | 2013 | 182 |
| 2188 | K61116 | SRR3320906 | CC19 | carrier | Kenya | II  | 2013 | 28  |
| 2189 | K61115 | SRR3320905 | CC10 | carrier | Kenya | Ib  | 2013 | 8   |
| 2190 | K61079 | SRR3320904 | CC17 | carrier | Kenya | III | 2013 | 17  |
| 2191 | K61078 | SRR3320903 | CC17 | carrier | Kenya | III | 2013 | 17  |
| 2192 | K61069 | SRR3320902 | CC23 | carrier | Kenya | V   | 2013 | 223 |
| 2193 | K61068 | SRR3320901 | CC17 | carrier | Kenya | III | 2013 | 484 |
| 2194 | K61067 | SRR3320900 | CC19 | carrier | Kenya | III | 2013 | 182 |
| 2195 | K61066 | SRR3320899 | CC23 | carrier | Kenya | V   | 2013 | 23  |
| 2196 | K61063 | SRR3320898 | CC17 | carrier | Kenya | III | 2013 | 17  |
| 2197 | K61062 | SRR3320897 | CC23 | carrier | Kenya | Ia  | 2013 | 23  |
| 2198 | K61061 | SRR3320896 | CC1  | carrier | Kenya | V   | 2013 | 1   |
| 2199 | K61060 | SRR3320895 | CC1  | carrier | Kenya | V   | 2013 | 1   |
| 2200 | K61053 | SRR3320894 | CC17 | carrier | Kenya | III | 2013 | 484 |
| 2201 | K61035 | SRR3320893 | CC23 | carrier | Kenya | Ia  | 2013 | 23  |
| 2202 | K61034 | SRR3320892 | CC23 | carrier | Kenya | Ia  | 2013 | 23  |
| 2203 | K61018 | SRR3320891 | CC17 | carrier | Kenya | III | 2013 | 484 |
| 2204 | K61017 | SRR3320890 | CC1  | carrier | Kenya | V   | 2013 | 794 |
| 2205 | K61016 | SRR3320889 | CC17 | carrier | Kenya | III | 2013 | 17  |
| 2206 | K61008 | SRR3320888 | CC10 | carrier | Kenya | Ib  | 2013 | 8   |
| 2207 | K61006 | SRR3320887 | CC17 | carrier | Kenya | III | 2013 | 17  |
| 2208 | K61005 | SRR3320886 | CC23 | carrier | Kenya | Ia  | 2013 | 23  |
| 2209 | K61000 | SRR3320885 | CC1  | carrier | Kenya | II  | 2013 | 2   |

|      |        |            |      |         |       |     |      |     |
|------|--------|------------|------|---------|-------|-----|------|-----|
| 2210 | K60999 | SRR3320884 | CC1  | carrier | Kenya | V   | 2013 | 1   |
| 2211 | K60994 | SRR3320883 | CC23 | carrier | Kenya | Ia  | 2013 | 23  |
| 2212 | K60992 | SRR3320882 | CC23 | carrier | Kenya | Ia  | 2013 | 23  |
| 2213 | K60961 | SRR3320881 | CC19 | carrier | Kenya | II  | 2013 | 28  |
| 2214 | K60957 | SRR3320880 | CC17 | carrier | Kenya | III | 2013 | 17  |
| 2215 | K60940 | SRR3320879 | CC19 | carrier | Kenya | III |      | 19  |
| 2216 | K60939 | SRR3320878 | CC17 | carrier | Kenya | III | 2013 | 17  |
| 2217 | K60937 | SRR3320877 | CC10 | carrier | Kenya | Ib  | 2013 | 10  |
| 2218 | K60929 | SRR3320876 | CC23 | carrier | Kenya | Ia  | 2013 | 802 |
| 2219 | K60928 | SRR3320875 | CC10 | carrier | Kenya | NT  | 2013 | 10  |
| 2220 | K60905 | SRR3320874 | CC19 | carrier | Kenya | III | 2013 | 182 |
| 2221 | K60903 | SRR3320873 | CC10 | carrier | Kenya | II  | 2013 | 10  |
| 2222 | K60902 | SRR3320872 | CC19 | carrier | Kenya | II  | 2013 | 28  |
| 2223 | K60901 | SRR3320871 | N/D  | carrier | Kenya | II  | 2013 |     |
| 2224 | K60888 | SRR3320870 | CC23 | carrier | Kenya | Ia  | 2013 | 23  |
| 2225 | K60887 | SRR3320869 | CC17 | carrier | Kenya | III | 2013 | 17  |
| 2226 | K60886 | SRR3320868 | CC23 | carrier | Kenya | Ia  | 2013 | 23  |
| 2227 | K60885 | SRR3320867 | CC17 | carrier | Kenya | III | 2013 | 17  |
| 2228 | K60881 | SRR3320866 | CC10 | carrier | Kenya | Ib  | 2013 | 8   |
| 2229 | K60880 | SRR3320865 | CC10 | carrier | Kenya | Ib  | 2013 | 8   |
| 2230 | K60878 | SRR3320864 | CC1  | carrier | Kenya | V   | 2013 | 1   |
| 2231 | K60877 | SRR3320863 | CC1  | carrier | Kenya | V   | 2013 | 799 |
| 2232 | K60876 | SRR3320862 | CC23 | carrier | Kenya | Ia  | 2013 | 23  |
| 2233 | K60871 | SRR3320861 | CC23 | carrier | Kenya | Ia  | 2013 | 23  |
| 2234 | K60870 | SRR3320860 | CC1  | carrier | Kenya | IV  | 2013 | 196 |
| 2235 | K60844 | SRR3320859 | CC23 | carrier | Kenya | Ia  | 2013 | 23  |
| 2236 | K60843 | SRR3320858 | CC17 | carrier | Kenya | III | 2013 | 800 |
| 2237 | K60831 | SRR3320857 | CC17 | carrier | Kenya | III | 2013 | 17  |
| 2238 | K60830 | SRR3320856 | CC17 | carrier | Kenya | III | 2013 | 17  |
| 2239 | K60829 | SRR3320855 | CC10 | carrier | Kenya | Ib  | 2013 | 8   |
| 2240 | K60812 | SRR3320854 | CC17 | carrier | Kenya | III | 2013 | 17  |
| 2241 | K60811 | SRR3320853 | CC19 | carrier | Kenya | III | 2013 | 19  |
| 2242 | K60801 | SRR3320852 | CC10 | carrier | Kenya | Ib  | 2013 | 10  |
| 2243 | K60800 | SRR3320851 | CC19 | carrier | Kenya | II  | 2013 | 28  |
| 2244 | K60799 | SRR3320850 | CC19 | carrier | Kenya | III | 2013 | 182 |
| 2245 | K60797 | SRR3320849 | CC17 | carrier | Kenya | III | 2013 | 17  |
| 2246 | K60796 | SRR3320848 | CC19 | carrier | Kenya | II  | 2013 | 28  |
| 2247 | K60794 | SRR3320847 | CC23 | carrier | Kenya | Ia  | 2013 | 23  |
| 2248 | K60793 | SRR3320846 | CC17 | carrier | Kenya | III | 2013 | 484 |
| 2249 | K60792 | SRR3320845 | N/D  | carrier | Kenya | III | 2013 |     |
| 2250 | K60790 | SRR3320844 | CC17 | carrier | Kenya | III | 2013 | 17  |
| 2251 | K60789 | SRR3320843 | CC19 | carrier | Kenya | V   | 2013 | 327 |
| 2252 | K60788 | SRR3320842 | CC17 | carrier | Kenya | III | 2013 | 17  |
| 2253 | K60785 | SRR3320841 | CC10 | carrier | Kenya | Ib  | 2013 | 8   |
| 2254 | K60756 | SRR3320840 | CC17 | carrier | Kenya | III | 2013 | 17  |
| 2255 | K60721 | SRR3320839 | CC19 | carrier | Kenya | III | 2013 | 182 |
| 2256 | K60720 | SRR3320838 | CC17 | carrier | Kenya | III | 2013 | 17  |
| 2257 | K60719 | SRR3320837 | CC17 | carrier | Kenya | III | 2013 | 17  |
| 2258 | K60715 | SRR3320836 | CC17 | carrier | Kenya | III | 2013 | 484 |
| 2259 | K60714 | SRR3320835 | CC23 | carrier | Kenya | Ia  | 2013 | 23  |
| 2260 | K60693 | SRR3320834 | CC1  | carrier | Kenya | V   | 2013 | 799 |
| 2261 | K60690 | SRR3320833 | CC1  | carrier | Kenya | V   | 2013 | 1   |
| 2262 | K60689 | SRR3320832 | CC23 | carrier | Kenya | V   | 2013 | 24  |
| 2263 | K60688 | SRR3320831 | CC10 | carrier | Kenya | II  | 2013 | 10  |
| 2264 | K60670 | SRR3320830 | CC17 | carrier | Kenya | III | 2013 | 17  |
| 2265 | K60668 | SRR3320829 | CC10 | carrier | Kenya | Ib  | 2013 | 10  |
| 2266 | K60666 | SRR3320828 | CC1  | carrier | Kenya | VII | 2013 | 1   |
| 2267 | K60664 | SRR3320827 | CC23 | carrier | Kenya | Ia  | 2013 | 23  |
| 2268 | K60663 | SRR3320826 | CC17 | carrier | Kenya | III | 2013 | 17  |
| 2269 | K60658 | SRR3320825 | CC23 | carrier | Kenya | Ia  | 2013 | 23  |
| 2270 | K60657 | SRR3320824 | CC1  | carrier | Kenya | V   | 2013 | 796 |
| 2271 | K60577 | SRR3320823 | CC23 | carrier | Kenya | V   | 2013 | 23  |

|      |        |            |      |         |       |     |      |     |
|------|--------|------------|------|---------|-------|-----|------|-----|
| 2272 | K60576 | SRR3320822 | CC10 | carrier | Kenya | Ib  | 2013 | 8   |
| 2273 | K60575 | SRR3320821 | CC1  | carrier | Kenya | IV  | 2013 | 196 |
| 2274 | K60574 | SRR3320820 | CC17 | carrier | Kenya | III | 2013 | 17  |
| 2275 | K60573 | SRR3320819 | CC23 | carrier | Kenya | III | 2013 | 55  |
| 2276 | K60572 | SRR3320818 | CC19 | carrier | Kenya | III | 2013 | 182 |
| 2277 | K60566 | SRR3320817 | CC17 | carrier | Kenya | III | 2013 | 17  |
| 2278 | K60565 | SRR3320816 | CC17 | carrier | Kenya | III | 2013 | 484 |
| 2279 | K60564 | SRR3320815 | CC17 | carrier | Kenya | III | 2013 | 17  |
| 2280 | K60516 | SRR3320814 | CC10 | carrier | Kenya | Ib  | 2013 | 8   |
| 2281 | K60508 | SRR3320813 | CC10 | carrier | Kenya | Ib  | 2013 | 8   |
| 2282 | K60442 | SRR3320812 | CC10 | carrier | Kenya | Ib  | 2013 | 8   |
| 2283 | K60434 | SRR3320811 | CC23 | carrier | Kenya | Ia  | 2013 | 23  |
| 2284 | K60433 | SRR3320810 | CC19 | carrier | Kenya | III | 2013 | 182 |
| 2285 | K60432 | SRR3320809 | CC17 | carrier | Kenya | III | 2013 | 17  |
| 2286 | K60428 | SRR3320808 | CC19 | carrier | Kenya | V   | 2013 | 793 |
| 2287 | K60427 | SRR3320807 | CC19 | carrier | Kenya | V   | 2013 | 793 |
| 2288 | K60426 | SRR3320806 | CC19 | carrier | Kenya | V   | 2013 | 328 |
| 2289 | K60291 | SRR3320805 | CC17 | carrier | Kenya | III | 2013 | 17  |
| 2290 | K60290 | SRR3320804 | CC19 | carrier | Kenya | III | 2013 | 19  |
| 2291 | K60028 | SRR3320803 | CC19 | carrier | Kenya | V   | 2012 | 327 |
| 2292 | K59962 | SRR3320802 | CC19 | carrier | Kenya | III | 2012 | 19  |
| 2293 | K59927 | SRR3320801 | CC19 | carrier | Kenya | III | 2012 | 19  |
| 2294 | K59917 | SRR3320800 | CC10 | carrier | Kenya | Ib  | 2012 | 8   |
| 2295 | K59881 | SRR3320799 | CC23 | carrier | Kenya | Ia  | 2012 | 23  |
| 2296 | K59813 | SRR3320798 | CC10 | carrier | Kenya | Ib  | 2012 | 10  |
| 2297 | K59793 | SRR3320797 | CC19 | carrier | Kenya | III | 2012 | 182 |
| 2298 | K59792 | SRR3320796 | CC19 | carrier | Kenya | V   | 2012 | 327 |
| 2299 | K59791 | SRR3320795 | CC17 | carrier | Kenya | III | 2012 | 17  |
| 2300 | K59790 | SRR3320794 | CC1  | carrier | Kenya | V   | 2012 | 1   |
| 2301 | K59789 | SRR3320793 | CC10 | carrier | Kenya | II  | 2012 | 10  |
| 2302 | K59778 | SRR3320792 | CC17 | carrier | Kenya | III | 2012 | 484 |
| 2303 | K59777 | SRR3320791 | CC23 | carrier | Kenya | Ia  | 2012 | 23  |
| 2304 | K59776 | SRR3320790 | CC19 | carrier | Kenya | II  | 2012 | 28  |
| 2305 | K59775 | SRR3320789 | CC19 | carrier | Kenya | III | 2012 | 182 |
| 2306 | K59774 | SRR3320788 | CC10 | carrier | Kenya | Ib  | 2012 | 8   |
| 2307 | K59773 | SRR3320787 | CC10 | carrier | Kenya | Ib  | 2012 | 8   |
| 2308 | K59772 | SRR3320786 | CC17 | carrier | Kenya | III | 2012 | 17  |
| 2309 | K59754 | SRR3320785 | CC19 | carrier | Kenya | III | 2012 | 182 |
| 2310 | K59753 | SRR3320784 | CC17 | carrier | Kenya | III | 2012 | 17  |
| 2311 | K59752 | SRR3320783 | CC19 | carrier | Kenya | II  | 2012 | 28  |
| 2312 | K59749 | SRR3320782 | CC17 | carrier | Kenya | III | 2012 | 484 |
| 2313 | K59748 | SRR3320781 | CC1  | carrier | Kenya | V   | 2012 | 1   |
| 2314 | K59747 | SRR3320780 | CC17 | carrier | Kenya | III | 2012 | 17  |
| 2315 | K59746 | SRR3320779 | CC23 | carrier | Kenya | Ia  | 2012 | 23  |
| 2316 | K59733 | SRR3320778 | CC17 | carrier | Kenya | III | 2012 | 17  |
| 2317 | K59731 | SRR3320777 | CC17 | carrier | Kenya | III | 2012 | 17  |
| 2318 | K59730 | SRR3320776 | CC23 | carrier | Kenya | Ia  | 2012 | 23  |
| 2319 | K59729 | SRR3320775 | CC17 | carrier | Kenya | III | 2012 | 484 |
| 2320 | K59712 | SRR3320774 | CC17 | carrier | Kenya | III | 2012 | 795 |
| 2321 | K59711 | SRR3320773 | CC17 | carrier | Kenya | III | 2012 | 17  |
| 2322 | K59710 | SRR3320772 | CC17 | carrier | Kenya | III | 2012 | 17  |
| 2323 | K59673 | SRR3320771 | CC17 | carrier | Kenya | III | 2012 | 484 |
| 2324 | K59648 | SRR3320770 | CC17 | carrier | Kenya | III | 2012 | 17  |
| 2325 | K59646 | SRR3320769 | CC23 | carrier | Kenya | Ia  | 2012 | 23  |
| 2326 | K59645 | SRR3320768 | CC17 | carrier | Kenya | III | 2012 | 17  |
| 2327 | K59605 | SRR3320767 | CC17 | carrier | Kenya | III | 2012 | 484 |
| 2328 | K59604 | SRR3320766 | CC19 | carrier | Kenya | III | 2012 | 182 |
| 2329 | K59594 | SRR3320765 | CC1  | carrier | Kenya | V   | 2012 | 1   |
| 2330 | K59593 | SRR3320764 | CC19 | carrier | Kenya | III | 2012 | 182 |
| 2331 | K59591 | SRR3320763 | CC10 | carrier | Kenya | Ib  | 2012 | 10  |
| 2332 | K59590 | SRR3320762 | CC17 | carrier | Kenya | III | 2012 | 17  |
| 2333 | K59589 | SRR3320761 | CC23 | carrier | Kenya | Ia  | 2012 | 23  |

|      |        |            |      |         |       |     |      |     |
|------|--------|------------|------|---------|-------|-----|------|-----|
| 2334 | K59580 | SRR3320760 | CC10 | carrier | Kenya | lb  | 2012 | 8   |
| 2335 | K59567 | SRR3320759 | CC10 | carrier | Kenya | lb  | 2012 | 10  |
| 2336 | K59566 | SRR3320758 | CC17 | carrier | Kenya | III | 2012 | 801 |
| 2337 | K59564 | SRR3320757 | CC17 | carrier | Kenya | III | 2012 | 17  |
| 2338 | K59528 | SRR3320756 | CC23 | carrier | Kenya | la  | 2012 | 23  |
| 2339 | K59527 | SRR3320755 | CC23 | carrier | Kenya | V   | 2012 | 23  |
| 2340 | K59526 | SRR3320754 | CC1  | carrier | Kenya | V   | 2012 | 1   |
| 2341 | K59524 | SRR3320753 | CC1  | carrier | Kenya | V   | 2012 | 1   |
| 2342 | K59522 | SRR3320752 | CC17 | carrier | Kenya | III | 2012 | 484 |
| 2343 | K59518 | SRR3320751 | CC1  | carrier | Kenya | V   | 2012 | 1   |
| 2344 | K59501 | SRR3320750 | CC23 | carrier | Kenya | V   | 2012 | 23  |
| 2345 | K59500 | SRR3320749 | CC10 | carrier | Kenya | lb  | 2012 | 10  |
| 2346 | K59499 | SRR3320748 | CC23 | carrier | Kenya | la  | 2012 | 23  |
| 2347 | K59498 | SRR3320747 | CC17 | carrier | Kenya | III | 2012 | 484 |
| 2348 | K59495 | SRR3320746 | CC10 | carrier | Kenya | lb  | 2012 | 10  |
| 2349 | K59494 | SRR3320745 | CC1  | carrier | Kenya | V   | 2012 | 1   |
| 2350 | K59463 | SRR3320744 | CC1  | carrier | Kenya | V   | 2012 | 1   |
| 2351 | K59441 | SRR3320743 | CC23 | carrier | Kenya | la  | 2012 | 23  |
| 2352 | K59440 | SRR3320742 | CC23 | carrier | Kenya | la  | 2012 | 23  |
| 2353 | K59439 | SRR3320741 | CC17 | carrier | Kenya | III | 2012 | 17  |
| 2354 | K59426 | SRR3320740 | CC17 | carrier | Kenya | III | 2012 | 17  |
| 2355 | K59425 | SRR3320739 | CC17 | carrier | Kenya | III | 2012 | 17  |
| 2356 | K59423 | SRR3320738 | CC17 | carrier | Kenya | III | 2012 | 17  |
| 2357 | K59411 | SRR3320737 | CC1  | carrier | Kenya | V   | 2012 | 1   |
| 2358 | K59410 | SRR3320736 | CC17 | carrier | Kenya | III | 2012 | 484 |
| 2359 | K59354 | SRR3320735 | CC1  | carrier | Kenya | la  | 2012 | 1   |
| 2360 | K59352 | SRR3320734 | CC19 | carrier | Kenya | III | 2012 | 182 |
| 2361 | K59292 | SRR3320733 | CC23 | carrier | Kenya | la  | 2012 | 23  |
| 2362 | K59290 | SRR3320732 | CC19 | carrier | Kenya | III | 2012 | 182 |
| 2363 | K59288 | SRR3320731 | CC23 | carrier | Kenya | la  | 2012 | 23  |
| 2364 | K59245 | SRR3320730 | CC17 | carrier | Kenya | III | 2012 | 484 |
| 2365 | K59230 | SRR3320729 | CC19 | carrier | Kenya | V   | 2012 | 328 |
| 2366 | K59219 | SRR3320728 | CC19 | carrier | Kenya | III | 2012 | 182 |
| 2367 | K59218 | SRR3320727 | CC19 | carrier | Kenya | III | 2012 | 182 |
| 2368 | K59217 | SRR3320726 | CC10 | carrier | Kenya | lb  | 2012 | 10  |
| 2369 | K59200 | SRR3320725 | CC17 | carrier | Kenya | III | 2012 | 17  |
| 2370 | K59199 | SRR3320724 | CC19 | carrier | Kenya | II  | 2012 | 28  |
| 2371 | K59184 | SRR3320723 | CC1  | carrier | Kenya | V   | 2012 | 796 |
| 2372 | K59183 | SRR3320722 | CC17 | carrier | Kenya | III | 2012 | 17  |
| 2373 | K59182 | SRR3320721 | CC1  | carrier | Kenya | V   | 2012 | 1   |
| 2374 | K59181 | SRR3320720 | CC10 | carrier | Kenya | lb  | 2012 | 10  |
| 2375 | K59167 | SRR3320719 | CC23 | carrier | Kenya | la  | 2012 | 23  |
| 2376 | K59154 | SRR3320718 | CC19 | carrier | Kenya | III | 2012 | 182 |
| 2377 | K59148 | SRR3320717 | CC23 | carrier | Kenya | la  | 2012 | 498 |
| 2378 | K59126 | SRR3320716 | CC17 | carrier | Kenya | III | 2012 | 17  |
| 2379 | K59113 | SRR3320715 | CC17 | carrier | Kenya | III | 2012 | 17  |
| 2380 | K59097 | SRR3320714 | CC17 | carrier | Kenya | III | 2012 | 17  |
| 2381 | K59095 | SRR3320713 | CC17 | carrier | Kenya | III | 2012 | 17  |
| 2382 | K59094 | SRR3320712 | CC19 | carrier | Kenya | III | 2012 | 182 |
| 2383 | K59086 | SRR3320711 | CC23 | carrier | Kenya | la  | 2012 | 23  |
| 2384 | K59071 | SRR3320710 | CC10 | carrier | Kenya | II  | 2012 | 10  |
| 2385 | K59070 | SRR3320709 | CC1  | carrier | Kenya | V   | 2012 | 1   |
| 2386 | K59068 | SRR3320708 | CC1  | carrier | Kenya | VII | 2012 | 167 |
| 2387 | K59067 | SRR3320707 | CC1  | carrier | Kenya | V   | 2012 | 1   |
| 2388 | K58954 | SRR3320706 | CC1  | carrier | Kenya | V   | 2012 | 1   |
| 2389 | K58915 | SRR3320705 | CC19 | carrier | Kenya | II  | 2012 | 28  |
| 2390 | K58906 | SRR3320704 | CC10 | carrier | Kenya | II  | 2012 | 10  |
| 2391 | K58905 | SRR3320703 | CC1  | carrier | Kenya | V   | 2012 | 1   |
| 2392 | K58884 | SRR3320702 | CC19 | carrier | Kenya | V   | 2012 | 19  |
| 2393 | K58864 | SRR3320701 | CC1  | carrier | Kenya | V   | 2012 | 1   |
| 2394 | K58833 | SRR3320700 | CC23 | carrier | Kenya | la  | 2012 | 23  |
| 2395 | K58820 | SRR3320699 | CC23 | carrier | Kenya | la  | 2012 | 23  |

|      |        |            |      |         |       |     |      |     |
|------|--------|------------|------|---------|-------|-----|------|-----|
| 2396 | K58806 | SRR3320698 | CC10 | carrier | Kenya | II  | 2012 | 10  |
| 2397 | K58805 | SRR3320697 | CC17 | carrier | Kenya | III | 2012 | 17  |
| 2398 | K58801 | SRR3320696 | CC23 | carrier | Kenya | Ia  | 2012 | 23  |
| 2399 | K58795 | SRR3320695 | CC17 | carrier | Kenya | III | 2012 | 17  |
| 2400 | K58773 | SRR3320694 | CC1  | carrier | Kenya | V   | 2012 | 1   |
| 2401 | K58771 | SRR3320693 | CC23 | carrier | Kenya | V   | 2012 | 23  |
| 2402 | K58760 | SRR3320692 | CC17 | carrier | Kenya | III | 2012 | 17  |
| 2403 | K58758 | SRR3320691 | CC17 | carrier | Kenya | III | 2012 | 484 |
| 2404 | K58737 | SRR3320690 | CC19 | carrier | Kenya | III | 2012 | 182 |
| 2405 | K58736 | SRR3320689 | CC10 | carrier | Kenya | II  | 2012 | 10  |
| 2406 | K58734 | SRR3320688 | CC19 | carrier | Kenya | III | 2012 | 19  |
| 2407 | K58711 | SRR3320687 | CC17 | carrier | Kenya | III | 2012 | 484 |
| 2408 | K58710 | SRR3320686 | CC10 | carrier | Kenya | Ib  | 2012 | 10  |
| 2409 | K58694 | SRR3320685 | CC17 | carrier | Kenya | III | 2012 | 17  |
| 2410 | K58690 | SRR3320684 | CC10 | carrier | Kenya | Ib  | 2012 | 10  |
| 2411 | K58634 | SRR3320683 | CC17 | carrier | Kenya | III | 2012 | 17  |
| 2412 | K58631 | SRR3320682 | CC23 | carrier | Kenya | Ia  | 2012 | 23  |
| 2413 | K58613 | SRR3320681 | CC1  | carrier | Kenya | V   | 2012 | 796 |
| 2414 | K58611 | SRR3320680 | CC23 | carrier | Kenya | Ia  | 2012 | 23  |
| 2415 | K58610 | SRR3320679 | CC23 | carrier | Kenya | Ia  | 2012 | 23  |
| 2416 | K58593 | SRR3320678 | CC1  | carrier | Kenya | IV  | 2012 | 196 |
| 2417 | K58592 | SRR3320677 | CC23 | carrier | Kenya | Ia  | 2012 | 23  |
| 2418 | K58591 | SRR3320676 | CC19 | carrier | Kenya | III | 2012 | 182 |
| 2419 | K58574 | SRR3320675 | CC17 | carrier | Kenya | III | 2012 | 484 |
| 2420 | K58551 | SRR3320674 | CC17 | carrier | Kenya | III | 2012 | 484 |
| 2421 | K58495 | SRR3320673 | CC19 | carrier | Kenya | III | 2012 | 182 |
| 2422 | K58493 | SRR3320672 | CC17 | carrier | Kenya | III | 2012 | 17  |
| 2423 | K58491 | SRR3320671 | CC17 | carrier | Kenya | III | 2012 | 17  |
| 2424 | K58489 | SRR3320670 | CC10 | carrier | Kenya | II  | 2012 | 10  |
| 2425 | K58460 | SRR3320669 | CC23 | carrier | Kenya | Ia  | 2012 | 23  |
| 2426 | K58435 | SRR3320668 | CC17 | carrier | Kenya | III | 2012 | 17  |
| 2427 | K58418 | SRR3320667 | CC10 | carrier | Kenya | Ib  | 2012 | 10  |
| 2428 | K58417 | SRR3320666 | CC23 | carrier | Kenya | Ia  | 2012 | 23  |
| 2429 | K58331 | SRR3320665 | CC19 | carrier | Kenya | III | 2012 | 182 |
| 2430 | K58317 | SRR3320664 | CC23 | carrier | Kenya | Ia  | 2012 | 23  |
| 2431 | K58316 | SRR3320663 | CC10 | carrier | Kenya | II  | 2012 | 10  |
| 2432 | K58308 | SRR3320662 | CC1  | carrier | Kenya | V   | 2012 | 1   |
| 2433 | K58307 | SRR3320661 | CC10 | carrier | Kenya | Ib  | 2012 | 8   |
| 2434 | K58306 | SRR3320660 | CC10 | carrier | Kenya | Ib  | 2012 | 8   |
| 2435 | K58274 | SRR3320659 | CC10 | carrier | Kenya | Ib  | 2012 | 8   |
| 2436 | K58243 | SRR3320658 | CC17 | carrier | Kenya | III | 2012 | 17  |
| 2437 | K58242 | SRR3320657 | CC10 | carrier | Kenya | Ib  | 2012 | 10  |
| 2438 | K58211 | SRR3320656 | CC17 | carrier | Kenya | III | 2012 | 801 |
| 2439 | K58185 | SRR3320655 | CC10 | carrier | Kenya | Ib  | 2012 | 8   |
| 2440 | K58137 | SRR3320654 | CC1  | carrier | Kenya | V   | 2012 | 1   |
| 2441 | K58136 | SRR3320653 | CC17 | carrier | Kenya | III | 2012 | 17  |
| 2442 | K58105 | SRR3320652 | CC10 | carrier | Kenya | Ib  | 2012 | 8   |
| 2443 | K58104 | SRR3320651 | CC17 | carrier | Kenya | III | 2012 | 17  |
| 2444 | K58057 | SRR3320650 | CC23 | carrier | Kenya | Ia  | 2012 | 23  |
| 2445 | K58056 | SRR3320649 | CC1  | carrier | Kenya | V   | 2012 | 1   |
| 2446 | K57992 | SRR3320648 | CC10 | carrier | Kenya | II  | 2012 | 10  |
| 2447 | K57976 | SRR3320647 | CC19 | carrier | Kenya | III | 2012 | 182 |
| 2448 | K57973 | SRR3320646 | CC10 | carrier | Kenya | Ib  | 2012 | 8   |
| 2449 | K57972 | SRR3320645 | CC1  | carrier | Kenya | V   | 2012 | 796 |
| 2450 | K57969 | SRR3320644 | CC23 | carrier | Kenya | Ia  | 2012 | 23  |
| 2451 | K57965 | SRR3320643 | CC17 | carrier | Kenya | III | 2012 | 17  |
| 2452 | K57964 | SRR3320642 | CC23 | carrier | Kenya | Ia  | 2012 | 23  |
| 2453 | K57912 | SRR3320641 | CC19 | carrier | Kenya | II  | 2012 | 28  |
| 2454 | K57910 | SRR3320640 | CC17 | carrier | Kenya | III | 2012 | 17  |
| 2455 | K57878 | SRR3320639 | CC23 | carrier | Kenya | Ia  | 2012 | 23  |
| 2456 | K57877 | SRR3320638 | CC10 | carrier | Kenya | Ib  | 2012 | 8   |
| 2457 | K57843 | SRR3320637 | CC17 | carrier | Kenya | III | 2012 | 17  |

|      |        |            |      |         |       |     |      |     |  |
|------|--------|------------|------|---------|-------|-----|------|-----|--|
| 2458 | K57809 | SRR3320636 | N/D  | carrier | Kenya | III | 2012 | 791 |  |
| 2459 | K57808 | SRR3320635 | N/D  | carrier | Kenya | V   | 2012 |     |  |
| 2460 | K57807 | SRR3320634 | CC1  | carrier | Kenya | VII | 2012 | 1   |  |
| 2461 | K57806 | SRR3320633 | CC17 | carrier | Kenya | III | 2012 | 17  |  |
| 2462 | K57805 | SRR3320632 | CC1  | carrier | Kenya | V   | 2012 | 1   |  |
| 2463 | K57804 | SRR3320631 | CC10 | carrier | Kenya | Ib  | 2012 | 8   |  |
| 2464 | K57803 | SRR3320630 | CC23 | carrier | Kenya | Ia  | 2012 | 23  |  |
| 2465 | K57788 | SRR3320629 | CC10 | carrier | Kenya | II  | 2012 | 10  |  |
| 2466 | K57787 | SRR3320628 | CC10 | carrier | Kenya | Ib  | 2012 | 10  |  |
| 2467 | K57786 | SRR3320627 | CC23 | carrier | Kenya | Ia  | 2012 | 23  |  |
| 2468 | K57751 | SRR3320626 | CC17 | carrier | Kenya | III | 2012 | 484 |  |
| 2469 | K57749 | SRR3320625 | CC17 | carrier | Kenya | III | 2012 | 484 |  |
| 2470 | K57643 | SRR3320624 | CC1  | carrier | Kenya | V   | 2012 | 1   |  |
| 2471 | K57571 | SRR3320623 | CC10 | carrier | Kenya | II  | 2012 | 10  |  |
| 2472 | K57570 | SRR3320622 | CC19 | carrier | Kenya | V   | 2012 | 327 |  |
| 2473 | K57546 | SRR3320621 | CC10 | carrier | Kenya | II  | 2012 | 10  |  |
| 2474 | K57545 | SRR3320620 | CC1  | carrier | Kenya | V   | 2012 | 1   |  |
| 2475 | K57543 | SRR3320619 | CC17 | carrier | Kenya | III | 2012 | 17  |  |
| 2476 | K57541 | SRR3320618 | CC19 | carrier | Kenya | III | 2012 | 182 |  |
| 2477 | K57540 | SRR3320617 | CC19 | carrier | Kenya | II  | 2012 | 28  |  |
| 2478 | K57539 | SRR3320616 | CC19 | carrier | Kenya | V   | 2012 | 327 |  |
| 2479 | K57538 | SRR3320615 | CC17 | carrier | Kenya | III | 2012 | 484 |  |
| 2480 | K57525 | SRR3320614 | CC1  | carrier | Kenya | V   | 2012 | 1   |  |
| 2481 | K57524 | SRR3320613 | CC19 | carrier | Kenya | III | 2012 | 182 |  |
| 2482 | K57515 | SRR3320612 | CC1  | carrier | Kenya | V   | 2012 | 796 |  |
| 2483 | K57514 | SRR3320611 | CC23 | carrier | Kenya | Ia  | 2012 | 23  |  |
| 2484 | K57513 | SRR3320610 | CC17 | carrier | Kenya | III | 2012 | 17  |  |
| 2485 | K57479 | SRR3320609 | CC19 | carrier | Kenya | III | 2012 | 182 |  |
| 2486 | K57478 | SRR3320608 | CC23 | carrier | Kenya | Ia  | 2012 | 23  |  |
| 2487 | K57477 | SRR3320607 | CC17 | carrier | Kenya | III | 2012 | 17  |  |
| 2488 | K57403 | SRR3320606 | CC10 | carrier | Kenya | Ib  | 2012 | 8   |  |
| 2489 | K57402 | SRR3320605 | CC17 | carrier | Kenya | III | 2012 | 484 |  |
| 2490 | K57401 | SRR3320604 | CC19 | carrier | Kenya | III | 2012 | 182 |  |
| 2491 | K57400 | SRR3320603 | CC10 | carrier | Kenya | Ib  | 2012 | 8   |  |
| 2492 | K57355 | SRR3320602 | CC10 | carrier | Kenya | II  | 2012 | 10  |  |
| 2493 | K57352 | SRR3320601 | CC19 | carrier | Kenya | II  | 2012 | 28  |  |
| 2494 | K57351 | SRR3320600 | CC17 | carrier | Kenya | III | 2012 | 17  |  |
| 2495 | K57350 | SRR3320599 | CC17 | carrier | Kenya | III | 2012 | 17  |  |
| 2496 | K57349 | SRR3320598 | CC17 | carrier | Kenya | III | 2012 | 17  |  |
| 2497 | K57348 | SRR3320597 | CC1  | carrier | Kenya | IV  | 2012 | 196 |  |
| 2498 | K57347 | SRR3320596 | CC23 | carrier | Kenya | V   | 2012 | 223 |  |
| 2499 | K57346 | SRR3320595 | CC10 | carrier | Kenya | II  | 2012 | 10  |  |
| 2500 | K57335 | SRR3320594 | CC17 | carrier | Kenya | III | 2012 | 17  |  |
| 2501 | K57334 | SRR3320593 | CC23 | carrier | Kenya | Ia  | 2012 | 23  |  |
| 2502 | K57199 | SRR3320592 | CC23 | carrier | Kenya | V   | 2012 | 23  |  |
| 2503 | K57198 | SRR3320591 | CC23 | carrier | Kenya | Ia  | 2012 | 23  |  |
| 2504 | K57174 | SRR3320590 | CC23 | carrier | Kenya | Ia  | 2012 | 23  |  |
| 2505 | K57173 | SRR3320589 | CC23 | carrier | Kenya | Ia  | 2012 | 23  |  |
| 2506 | K57171 | SRR3320588 | CC23 | carrier | Kenya | Ia  | 2012 | 23  |  |
| 2507 | K57149 | SRR3320587 | CC23 | carrier | Kenya | Ia  | 2012 | 144 |  |
| 2508 | K57135 | SRR3320586 | CC23 | carrier | Kenya | Ia  | 2012 | 23  |  |
| 2509 | K57124 | SRR3320585 | CC1  | carrier | Kenya | IV  | 2012 | 196 |  |
| 2510 | K57093 | SRR3320584 | CC23 | carrier | Kenya | Ia  | 2012 | 23  |  |
| 2511 | K57092 | SRR3320583 | CC23 | carrier | Kenya | Ia  | 2012 | 23  |  |
| 2512 | K57090 | SRR3320582 | CC23 | carrier | Kenya | Ia  | 2012 | 23  |  |
| 2513 | K57089 | SRR3320581 | CC17 | carrier | Kenya | III | 2012 | 17  |  |
| 2514 | K57069 | SRR3320580 | CC19 | carrier | Kenya | V   | 2012 | 327 |  |
| 2515 | K57068 | SRR3320579 | CC19 | carrier | Kenya | III | 2012 | 182 |  |
| 2516 | K57066 | SRR3320578 | CC19 | carrier | Kenya | II  | 2012 | 28  |  |
| 2517 | K57064 | SRR3320577 | CC23 | carrier | Kenya | Ia  | 2012 | 23  |  |
| 2518 | K57062 | SRR3320576 | CC10 | carrier | Kenya | Ib  | 2012 | 10  |  |
| 2519 | K57056 | SRR3320575 | CC10 | carrier | Kenya | II  | 2012 | 10  |  |



|      |        |            |      |         |       |     |      |     |
|------|--------|------------|------|---------|-------|-----|------|-----|
| 2520 | K57050 | SRR3320574 | CC1  | carrier | Kenya | IV  | 2012 | 196 |
| 2521 | K57049 | SRR3320573 | CC17 | carrier | Kenya | III | 2012 | 17  |
| 2522 | K57015 | SRR3320572 | CC23 | carrier | Kenya | Ia  | 2012 | 23  |
| 2523 | K56996 | SRR3320571 | CC1  | carrier | Kenya | V   | 2012 | 1   |
| 2524 | K56995 | SRR3320570 | CC17 | carrier | Kenya | III | 2012 | 484 |
| 2525 | K56992 | SRR3320569 | CC10 | carrier | Kenya | Ib  | 2012 | 8   |
| 2526 | K56991 | SRR3320568 | CC17 | carrier | Kenya | III | 2012 | 484 |
| 2527 | K56989 | SRR3320567 | CC17 | carrier | Kenya | III | 2012 | 484 |
| 2528 | K56988 | SRR3320566 | CC17 | carrier | Kenya | III | 2012 | 17  |
| 2529 | K56981 | SRR3320565 | CC17 | carrier | Kenya | III | 2012 | 790 |
| 2530 | K56957 | SRR3320564 | CC23 | carrier | Kenya | Ia  | 2012 | 23  |
| 2531 | K56949 | SRR3320563 | CC17 | carrier | Kenya | III | 2012 | 17  |
| 2532 | K56943 | SRR3320562 | CC19 | carrier | Kenya | V   | 2012 | 327 |
| 2533 | K56917 | SRR3320561 | N/D  | carrier | Kenya | Ia  | 2012 | 486 |
| 2534 | K56914 | SRR3320560 | CC23 | carrier | Kenya | Ia  | 2012 | 23  |
| 2535 | K56913 | SRR3320559 | CC23 | carrier | Kenya | Ia  | 2012 | 23  |
| 2536 | K56889 | SRR3320558 | CC17 | carrier | Kenya | III | 2012 | 17  |
| 2537 | K56872 | SRR3320557 | CC10 | carrier | Kenya | NT  | 2012 | 8   |
| 2538 | K56866 | SRR3320556 | CC17 | carrier | Kenya | III | 2012 | 484 |
| 2539 | K56857 | SRR3320555 | CC17 | carrier | Kenya | III | 2012 | 17  |
| 2540 | K56814 | SRR3320554 | CC17 | carrier | Kenya | III | 2012 | 484 |
| 2541 | K56813 | SRR3320553 | CC19 | carrier | Kenya | V   | 2012 | 327 |
| 2542 | K56810 | SRR3320552 | CC23 | carrier | Kenya | Ia  | 2012 | 23  |
| 2543 | K56809 | SRR3320551 | CC17 | carrier | Kenya | III | 2012 | 17  |
| 2544 | K56802 | SRR3320550 | CC10 | carrier | Kenya | Ib  | 2012 | 8   |
| 2545 | K56800 | SRR3320549 | CC23 | carrier | Kenya | Ia  | 2012 | 23  |
| 2546 | K56799 | SRR3320548 | CC19 | carrier | Kenya | V   | 2012 | 19  |
| 2547 | K56798 | SRR3320547 | CC23 | carrier | Kenya | Ia  | 2012 | 23  |
| 2548 | K56797 | SRR3320546 | CC19 | carrier | Kenya | III | 2012 | 182 |
| 2549 | K56796 | SRR3320545 | CC17 | carrier | Kenya | III | 2012 | 17  |
| 2550 | K56794 | SRR3320544 | CC17 | carrier | Kenya | III | 2012 | 17  |
| 2551 | K56781 | SRR3320543 | CC23 | carrier | Kenya | Ia  | 2012 | 23  |
| 2552 | K56778 | SRR3320542 | CC23 | carrier | Kenya | Ia  | 2012 | 23  |
| 2553 | K56777 | SRR3320541 | CC23 | carrier | Kenya | Ia  | 2012 | 23  |
| 2554 | K56776 | SRR3320540 | CC23 | carrier | Kenya | Ia  | 2012 | 23  |
| 2555 | K56758 | SRR3320539 | CC23 | carrier | Kenya | Ia  | 2012 | 23  |
| 2556 | K56745 | SRR3320538 | CC23 | carrier | Kenya | Ia  | 2012 | 23  |
| 2557 | K56722 | SRR3320537 | CC19 | carrier | Kenya | III | 2012 | 182 |
| 2558 | K56721 | SRR3320536 | CC17 | carrier | Kenya | III | 2012 | 484 |
| 2559 | K56719 | SRR3320535 | CC10 | carrier | Kenya | Ib  | 2012 | 8   |
| 2560 | K56718 | SRR3320534 | CC23 | carrier | Kenya | Ia  | 2012 | 23  |
| 2561 | K56704 | SRR3320533 | CC19 | carrier | Kenya | III | 2012 | 182 |
| 2562 | K56702 | SRR3320532 | CC23 | carrier | Kenya | Ia  | 2012 | 23  |
| 2563 | K56689 | SRR3320531 | CC23 | carrier | Kenya | Ia  | 2012 | 23  |
| 2564 | K56687 | SRR3320530 | CC23 | carrier | Kenya | Ia  | 2012 | 23  |
| 2565 | K56685 | SRR3320529 | CC10 | carrier | Kenya | Ib  | 2012 | 8   |
| 2566 | K56684 | SRR3320528 | CC10 | carrier | Kenya | Ib  | 2012 | 10  |
| 2567 | K56668 | SRR3320527 | CC10 | carrier | Kenya | II  | 2012 | 10  |
| 2568 | K56667 | SRR3320526 | CC1  | carrier | Kenya | V   | 2012 | 1   |
| 2569 | K56665 | SRR3320525 | CC17 | carrier | Kenya | III | 2012 | 484 |
| 2570 | K56664 | SRR3320524 | CC17 | carrier | Kenya | III | 2012 | 484 |
| 2571 | K56646 | SRR3320523 | N/D  | carrier | Kenya | V   | 2012 | 3   |
| 2572 | K56645 | SRR3320522 | CC17 | carrier | Kenya | III | 2012 | 17  |
| 2573 | K56635 | SRR3320521 | CC19 | carrier | Kenya | V   | 2012 | 327 |
| 2574 | K56634 | SRR3320520 | CC23 | carrier | Kenya | Ia  | 2012 | 23  |
| 2575 | K56619 | SRR3320519 | CC23 | carrier | Kenya | Ia  | 2012 | 23  |
| 2576 | K56615 | SRR3320518 | CC17 | carrier | Kenya | III | 2012 | 17  |
| 2577 | K56614 | SRR3320517 | CC19 | carrier | Kenya | III | 2012 | 182 |
| 2578 | K56613 | SRR3320516 | CC19 | carrier | Kenya | II  | 2012 | 28  |
| 2579 | K56612 | SRR3320515 | CC23 | carrier | Kenya | Ia  | 2012 | 498 |
| 2580 | K56611 | SRR3320514 | N/D  | carrier | Kenya | Ia  | 2012 | 486 |
| 2581 | K56610 | SRR3320513 | CC23 | carrier | Kenya | Ia  | 2012 | 23  |

|      |        |            |      |         |       |     |      |     |
|------|--------|------------|------|---------|-------|-----|------|-----|
| 2582 | K56586 | SRR3320512 | CC10 | carrier | Kenya | Ib  | 2012 | 10  |
| 2583 | K56585 | SRR3320511 | CC10 | carrier | Kenya | Ib  | 2012 | 10  |
| 2584 | K56583 | SRR3320510 | CC23 | carrier | Kenya | Ia  | 2012 | 24  |
| 2585 | K56581 | SRR3320509 | CC23 | carrier | Kenya | V   | 2012 | 24  |
| 2586 | K56570 | SRR3320508 | CC23 | carrier | Kenya | Ia  | 2012 | 23  |
| 2587 | K56555 | SRR3320507 | CC23 | carrier | Kenya | Ia  | 2012 | 23  |
| 2588 | K56545 | SRR3320506 | CC19 | carrier | Kenya | II  | 2012 | 28  |
| 2589 | K56509 | SRR3320505 | CC19 | carrier | Kenya | II  | 2012 | 28  |
| 2590 | K56508 | SRR3320504 | CC17 | carrier | Kenya | III | 2012 | 17  |
| 2591 | K56507 | SRR3320503 | CC23 | carrier | Kenya | Ia  | 2012 | 23  |
| 2592 | K56506 | SRR3320502 | CC19 | carrier | Kenya | III | 2012 | 19  |
| 2593 | K56494 | SRR3320501 | CC23 | carrier | Kenya | Ia  | 2012 | 23  |
| 2594 | K56493 | SRR3320500 | CC10 | carrier | Kenya | II  | 2012 | 10  |
| 2595 | K56492 | SRR3320499 | CC1  | carrier | Kenya | V   | 2012 | 1   |
| 2596 | K56487 | SRR3320498 | CC1  | carrier | Kenya | V   | 2012 | 1   |
| 2597 | K56486 | SRR3320497 | CC23 | carrier | Kenya | Ia  | 2012 | 23  |
| 2598 | K56484 | SRR3320496 | CC23 | carrier | Kenya | Ia  | 2012 | 498 |
| 2599 | K56483 | SRR3320495 | CC10 | carrier | Kenya | II  | 2012 | 10  |
| 2600 | K56482 | SRR3320494 | CC19 | carrier | Kenya | III | 2012 | 182 |
| 2601 | K56479 | SRR3320493 | CC10 | carrier | Kenya | Ib  | 2012 | 8   |
| 2602 | K56477 | SRR3320492 | CC23 | carrier | Kenya | Ia  | 2012 | 23  |
| 2603 | K56463 | SRR3320491 | CC19 | carrier | Kenya | III | 2012 | 182 |
| 2604 | K56453 | SRR3320490 | CC1  | carrier | Kenya | IV  | 2012 | 196 |
| 2605 | K56442 | SRR3320489 | CC23 | carrier | Kenya | Ia  | 2012 | 23  |
| 2606 | K56436 | SRR3320488 | CC23 | carrier | Kenya | Ia  | 2012 | 23  |
| 2607 | K56435 | SRR3320487 | CC23 | carrier | Kenya | Ia  | 2012 | 23  |
| 2608 | K56432 | SRR3320486 | CC23 | carrier | Kenya | Ia  | 2012 | 23  |
| 2609 | K56431 | SRR3320485 | CC23 | carrier | Kenya | Ia  | 2012 | 23  |
| 2610 | K56419 | SRR3320484 | CC23 | carrier | Kenya | Ia  | 2012 | 23  |
| 2611 | K56418 | SRR3320483 | CC23 | carrier | Kenya | Ia  | 2012 | 23  |
| 2612 | K56377 | SRR3320482 | CC23 | carrier | Kenya | Ia  | 2012 | 23  |
| 2613 | K56374 | SRR3320481 | CC1  | carrier | Kenya | IV  | 2012 | 196 |
| 2614 | K56373 | SRR3320480 | CC19 | carrier | Kenya | III | 2012 | 182 |
| 2615 | K56372 | SRR3320479 | CC17 | carrier | Kenya | III | 2012 | 792 |
| 2616 | K56371 | SRR3320478 | CC17 | carrier | Kenya | III | 2012 | 17  |
| 2617 | K56370 | SRR3320477 | CC1  | carrier | Kenya | V   | 2012 | 1   |
| 2618 | K56369 | SRR3320476 | CC17 | carrier | Kenya | III | 2012 | 17  |
| 2619 | K56367 | SRR3320475 | CC19 | carrier | Kenya | V   | 2012 | 327 |
| 2620 | K56366 | SRR3320474 | CC1  | carrier | Kenya | V   | 2012 | 1   |
| 2621 | K56341 | SRR3320473 | CC10 | carrier | Kenya | Ib  | 2012 | 8   |
| 2622 | K56333 | SRR3320472 | CC19 | carrier | Kenya | V   | 2012 | 327 |
| 2623 | K56278 | SRR3320471 | CC10 | carrier | Kenya | Ib  | 2012 | 8   |
| 2624 | K56264 | SRR3320470 | CC19 | carrier | Kenya | V   | 2012 | 19  |
| 2625 | K56263 | SRR3320469 | CC1  | carrier | Kenya | V   | 2012 | 1   |
| 2626 | K56261 | SRR3320468 | CC19 | carrier | Kenya | III | 2012 | 19  |
| 2627 | K56247 | SRR3320467 | CC23 | carrier | Kenya | Ia  | 2012 | 23  |
| 2628 | K56246 | SRR3320466 | CC17 | carrier | Kenya | III | 2012 | 17  |
| 2629 | K56245 | SRR3320465 | CC17 | carrier | Kenya | III | 2012 | 17  |
| 2630 | K56244 | SRR3320464 | CC1  | carrier | Kenya | V   | 2012 | 1   |
| 2631 | K56235 | SRR3320463 | CC17 | carrier | Kenya | III | 2012 | 788 |
| 2632 | K56234 | SRR3320462 | CC23 | carrier | Kenya | Ia  | 2012 | 23  |
| 2633 | K56233 | SRR3320461 | CC23 | carrier | Kenya | Ia  | 2012 | 23  |
| 2634 | K56232 | SRR3320460 | CC23 | carrier | Kenya | Ia  | 2012 | 23  |
| 2635 | K56231 | SRR3320459 | CC17 | carrier | Kenya | III | 2012 | 17  |
| 2636 | K56228 | SRR3320458 | CC17 | carrier | Kenya | III | 2012 | 17  |
| 2637 | K56218 | SRR3320457 | CC17 | carrier | Kenya | III | 2012 | 17  |
| 2638 | K56217 | SRR3320456 | CC23 | carrier | Kenya | Ia  | 2012 | 23  |
| 2639 | K56198 | SRR3320455 | CC23 | carrier | Kenya | Ia  | 2012 | 23  |
| 2640 | K56197 | SRR3320454 | CC19 | carrier | Kenya | III | 2012 | 19  |
| 2641 | K56196 | SRR3320453 | CC10 | carrier | Kenya | Ib  | 2012 | 10  |
| 2642 | K56195 | SRR3320452 | CC17 | carrier | Kenya | III | 2012 | 801 |
| 2643 | K56194 | SRR3320451 | CC19 | carrier | Kenya | III | 2012 | 182 |

|      |        |            |      |         |       |     |      |     |
|------|--------|------------|------|---------|-------|-----|------|-----|
| 2644 | K56193 | SRR3320450 | CC19 | carrier | Kenya | II  | 2012 | 28  |
| 2645 | K56186 | SRR3320449 | CC23 | carrier | Kenya | Ia  | 2012 | 498 |
| 2646 | K56185 | SRR3320448 | CC17 | carrier | Kenya | III | 2012 | 17  |
| 2647 | K56184 | SRR3320447 | CC19 | carrier | Kenya | III | 2012 | 182 |
| 2648 | K56183 | SRR3320446 | CC17 | carrier | Kenya | III | 2012 | 17  |
| 2649 | K56159 | SRR3320445 | CC1  | carrier | Kenya | V   | 2012 | 1   |
| 2650 | K56114 | SRR3320444 | CC1  | carrier | Kenya | V   | 2012 | 1   |
| 2651 | K56113 | SRR3320443 | CC23 | carrier | Kenya | Ia  | 2012 | 23  |
| 2652 | K56076 | SRR3320442 | CC10 | carrier | Kenya | Ib  | 2012 | 10  |
| 2653 | K56074 | SRR3320441 | CC19 | carrier | Kenya | III | 2012 | 182 |
| 2654 | K56073 | SRR3320440 | CC19 | carrier | Kenya | III | 2012 | 182 |
| 2655 | K56071 | SRR3320439 | CC17 | carrier | Kenya | III | 2012 | 484 |
| 2656 | K56070 | SRR3320438 | CC10 | carrier | Kenya | Ib  | 2012 | 10  |
| 2657 | K56069 | SRR3320437 | CC23 | carrier | Kenya | Ia  | 2012 | 23  |
| 2658 | K56064 | SRR3320436 | CC17 | carrier | Kenya | III | 2012 | 484 |
| 2659 | K56062 | SRR3320435 | CC17 | carrier | Kenya | III | 2012 | 17  |
| 2660 | K56061 | SRR3320434 | CC17 | carrier | Kenya | III | 2012 | 484 |
| 2661 | K56046 | SRR3320433 | CC19 | carrier | Kenya | III | 2012 | 182 |
| 2662 | K56031 | SRR3320432 | CC17 | carrier | Kenya | III | 2012 | 484 |
| 2663 | K55997 | SRR3320431 | CC23 | carrier | Kenya | Ia  | 2012 | 23  |
| 2664 | K55996 | SRR3320430 | CC10 | carrier | Kenya | Ib  | 2012 | 8   |
| 2665 | K55980 | SRR3320429 | CC23 | carrier | Kenya | Ia  | 2012 | 23  |
| 2666 | K55979 | SRR3320428 | CC23 | carrier | Kenya | V   | 2012 | 23  |
| 2667 | K55960 | SRR3320427 | CC19 | carrier | Kenya | V   | 2012 | 327 |
| 2668 | K55959 | SRR3320426 | CC19 | carrier | Kenya | III | 2012 | 182 |
| 2669 | K55958 | SRR3320425 | CC19 | carrier | Kenya | II  | 2012 | 28  |
| 2670 | K55896 | SRR3320424 | CC23 | carrier | Kenya | Ia  | 2012 | 23  |
| 2671 | K55895 | SRR3320423 | CC19 | carrier | Kenya | III | 2012 | 182 |
| 2672 | K55881 | SRR3320422 | CC17 | carrier | Kenya | III | 2012 | 484 |
| 2673 | K55880 | SRR3320421 | CC23 | carrier | Kenya | Ia  | 2012 | 23  |
| 2674 | K55761 | SRR3320420 | CC23 | carrier | Kenya | Ia  | 2012 | 23  |
| 2675 | K55711 | SRR3320419 | CC1  | carrier | Kenya | V   | 2012 | 796 |
| 2676 | K55655 | SRR3320418 | CC17 | carrier | Kenya | III | 2012 | 801 |
| 2677 | K55631 | SRR3320417 | CC17 | carrier | Kenya | III | 2012 | 17  |
| 2678 | K55630 | SRR3320416 | CC10 | carrier | Kenya | Ib  | 2012 | 10  |
| 2679 | K55603 | SRR3320415 | CC17 | carrier | Kenya | III | 2012 | 17  |
| 2680 | K55594 | SRR3320414 | CC17 | carrier | Kenya | III | 2012 | 484 |
| 2681 | K55593 | SRR3320413 | CC17 | carrier | Kenya | III | 2012 | 17  |
| 2682 | K55547 | SRR3320412 | CC17 | carrier | Kenya | III | 2012 | 17  |
| 2683 | K55532 | SRR3320411 | CC23 | carrier | Kenya | Ia  | 2012 | 23  |
| 2684 | K55531 | SRR3320410 | CC10 | carrier | Kenya | II  | 2012 | 10  |
| 2685 | K55530 | SRR3320409 | CC19 | carrier | Kenya | V   | 2012 | 328 |
| 2686 | K55529 | SRR3320408 | CC10 | carrier | Kenya | II  | 2012 | 10  |
| 2687 | K55513 | SRR3320407 | CC19 | carrier | Kenya | V   | 2012 | 328 |
| 2688 | K55494 | SRR3320406 | N/D  | carrier | Kenya | Ib  | 2012 | 785 |
| 2689 | K55493 | SRR3320405 | CC17 | carrier | Kenya | III | 2012 | 17  |
| 2690 | K55454 | SRR3320404 | CC10 | carrier | Kenya | Ib  | 2012 | 8   |
| 2691 | K55453 | SRR3320403 | CC1  | carrier | Kenya | V   | 2012 | 1   |
| 2692 | K55452 | SRR3320402 | CC23 | carrier | Kenya | V   | 2012 | 24  |
| 2693 | K55442 | SRR3320401 | CC23 | carrier | Kenya | Ia  | 2012 | 23  |
| 2694 | K55441 | SRR3320400 | CC23 | carrier | Kenya | Ia  | 2012 | 23  |
| 2695 | K55427 | SRR3320399 | CC19 | carrier | Kenya | V   | 2012 | 328 |
| 2696 | K55425 | SRR3320398 | CC10 | carrier | Kenya | Ib  | 2012 | 10  |
| 2697 | K55416 | SRR3320397 | CC17 | carrier | Kenya | III | 2012 | 17  |
| 2698 | K55398 | SRR3320396 | CC19 | carrier | Kenya | V   | 2012 | 327 |
| 2699 | K55357 | SRR3320395 | CC23 | carrier | Kenya | V   | 2012 | 23  |
| 2700 | K55356 | SRR3320394 | CC19 | carrier | Kenya | V   | 2012 | 327 |
| 2701 | K55320 | SRR3320393 | CC17 | carrier | Kenya | III | 2012 | 17  |
| 2702 | K55292 | SRR3320392 | CC17 | carrier | Kenya | III | 2012 | 17  |
| 2703 | K55286 | SRR3320391 | CC17 | carrier | Kenya | IV  | 2012 | 291 |
| 2704 | K55280 | SRR3320390 | CC23 | carrier | Kenya | Ia  | 2012 | 23  |
| 2705 | K55234 | SRR3320389 | CC10 | carrier | Kenya | Ib  | 2012 | 10  |

|      |        |            |      |         |       |     |      |     |  |
|------|--------|------------|------|---------|-------|-----|------|-----|--|
| 2706 | K55219 | SRR3320388 | CC1  | carrier | Kenya | IV  | 2012 | 196 |  |
| 2707 | K55218 | SRR3320387 | CC10 | carrier | Kenya | Ib  | 2012 | 8   |  |
| 2708 | K52864 | SRR3320386 | CC23 | carrier | Kenya | Ia  | 2012 | 23  |  |
| 2709 | K52862 | SRR3320385 | CC17 | carrier | Kenya | III | 2012 | 17  |  |
| 2710 | K52817 | SRR3320384 | CC19 | carrier | Kenya | V   | 2012 | 327 |  |
| 2711 | K52808 | SRR3320383 | CC19 | carrier | Kenya | II  | 2012 | 28  |  |
| 2712 | K52792 | SRR3320382 | CC10 | carrier | Kenya | Ib  | 2012 | 10  |  |
| 2713 | K52781 | SRR3320381 | CC1  | carrier | Kenya | V   | 2012 | 1   |  |
| 2714 | K52780 | SRR3320380 | CC19 | carrier | Kenya | III | 2012 | 182 |  |
| 2715 | K52779 | SRR3320379 | CC19 | carrier | Kenya | V   | 2012 | 327 |  |
| 2716 | K52774 | SRR3320378 | CC23 | carrier | Kenya | Ia  | 2012 | 23  |  |
| 2717 | K52773 | SRR3320377 | CC17 | carrier | Kenya | III | 2012 | 17  |  |
| 2718 | K52692 | SRR3320376 | CC23 | carrier | Kenya | Ia  | 2012 | 23  |  |
| 2719 | K52674 | SRR3320375 | CC10 | carrier | Kenya | Ib  | 2012 | 10  |  |
| 2720 | K52662 | SRR3320374 | CC10 | carrier | Kenya | II  | 2012 | 10  |  |
| 2721 | K52647 | SRR3320373 | CC17 | carrier | Kenya | III | 2012 | 17  |  |
| 2722 | K52646 | SRR3320372 | CC17 | carrier | Kenya | III | 2012 | 17  |  |
| 2723 | K52623 | SRR3320371 | CC17 | carrier | Kenya | III | 2012 | 17  |  |
| 2724 | K52615 | SRR3320370 | CC19 | carrier | Kenya | III | 2012 | 182 |  |
| 2725 | K52539 | SRR3320369 | CC23 | carrier | Kenya | Ia  | 2012 | 23  |  |
| 2726 | K52487 | SRR3320368 | CC1  | carrier | Kenya | V   | 2012 | 1   |  |
| 2727 | K52486 | SRR3320367 | CC17 | carrier | Kenya | III | 2012 | 17  |  |
| 2728 | K52459 | SRR3320366 | CC10 | carrier | Kenya | Ib  | 2012 | 10  |  |
| 2729 | K52458 | SRR3320365 | CC1  | carrier | Kenya | IV  | 2012 | 196 |  |
| 2730 | K52454 | SRR3320364 | CC19 | carrier | Kenya | V   | 2012 | 327 |  |
| 2731 | K52452 | SRR3320363 | CC23 | carrier | Kenya | V   | 2012 | 24  |  |
| 2732 | K52433 | SRR3320362 | CC1  | carrier | Kenya | V   | 2012 | 1   |  |
| 2733 | K52432 | SRR3320361 | CC10 | carrier | Kenya | II  | 2012 | 10  |  |
| 2734 | K52396 | SRR3320360 | CC19 | carrier | Kenya | III | 2012 | 182 |  |
| 2735 | K52368 | SRR3320359 | CC1  | carrier | Kenya | V   | 2012 | 1   |  |
| 2736 | K52367 | SRR3320358 | CC17 | carrier | Kenya | III | 2012 | 17  |  |
| 2737 | K52346 | SRR3320357 | CC17 | carrier | Kenya | III | 2012 | 17  |  |
| 2738 | K52345 | SRR3320356 | CC19 | carrier | Kenya | III | 2012 | 19  |  |
| 2739 | K52318 | SRR3320355 | CC1  | carrier | Kenya | V   | 2012 | 1   |  |
| 2740 | K52315 | SRR3320354 | CC17 | carrier | Kenya | III | 2012 | 17  |  |
| 2741 | K52314 | SRR3320353 | CC10 | carrier | Kenya | Ib  | 2012 | 8   |  |
| 2742 | K52274 | SRR3320352 | CC1  | carrier | Kenya | V   | 2012 | 1   |  |
| 2743 | K52157 | SRR3320351 | CC19 | carrier | Kenya | V   | 2012 | 328 |  |
| 2744 | K52086 | SRR3320350 | CC10 | carrier | Kenya | Ib  | 2012 | 787 |  |
| 2745 | K52085 | SRR3320349 | CC19 | carrier | Kenya | III | 2012 | 182 |  |
| 2746 | K52084 | SRR3320348 | CC23 | carrier | Kenya | Ia  | 2012 | 23  |  |
| 2747 | K52083 | SRR3320347 | CC1  | carrier | Kenya | V   | 2012 | 1   |  |
| 2748 | K52082 | SRR3320346 | CC19 | carrier | Kenya | II  | 2012 | 28  |  |
| 2749 | K52067 | SRR3320345 | CC19 | carrier | Kenya | II  | 2012 | 28  |  |
| 2750 | K52065 | SRR3320344 | CC17 | carrier | Kenya | III | 2012 | 801 |  |
| 2751 | K52064 | SRR3320343 | CC10 | carrier | Kenya | Ib  | 2012 | 10  |  |
| 2752 | K52050 | SRR3320342 | CC1  | carrier | Kenya | V   | 2012 | 1   |  |
| 2753 | K52049 | SRR3320341 | CC17 | carrier | Kenya | III | 2012 | 17  |  |
| 2754 | K52048 | SRR3320340 | CC19 | carrier | Kenya | II  | 2012 | 28  |  |
| 2755 | K51965 | SRR3320339 | CC19 | carrier | Kenya | V   | 2012 | 327 |  |
| 2756 | K51887 | SRR3320338 | CC19 | carrier | Kenya | V   | 2011 | 327 |  |
| 2757 | K51855 | SRR3320337 | CC19 | carrier | Kenya | II  | 2011 | 28  |  |
| 2758 | K51818 | SRR3320336 | CC17 | carrier | Kenya | III | 2011 | 17  |  |
| 2759 | K51792 | SRR3320335 | CC10 | carrier | Kenya | Ib  | 2011 | 10  |  |
| 2760 | K51745 | SRR3320334 | CC17 | carrier | Kenya | III | 2011 | 17  |  |
| 2761 | K51742 | SRR3320333 | CC17 | carrier | Kenya | III | 2011 | 17  |  |
| 2762 | K51738 | SRR3320332 | CC17 | carrier | Kenya | III | 2011 | 17  |  |
| 2763 | K51705 | SRR3320331 | CC19 | carrier | Kenya | III | 2011 | 19  |  |
| 2764 | K51704 | SRR3320330 | N/D  | carrier | Kenya | Ib  | 2011 |     |  |
| 2765 | K51698 | SRR3320329 | CC1  | carrier | Kenya | V   | 2011 | 1   |  |
| 2766 | K51617 | SRR3320328 | CC17 | carrier | Kenya | III | 2011 | 17  |  |
| 2767 | K51608 | SRR3320327 | CC17 | carrier | Kenya | III | 2011 | 17  |  |

|      |        |            |      |         |       |     |      |     |  |
|------|--------|------------|------|---------|-------|-----|------|-----|--|
| 2768 | K51590 | SRR3320326 | CC17 | carrier | Kenya | III | 2011 | 484 |  |
| 2769 | K51578 | SRR3320325 | CC17 | carrier | Kenya | III | 2011 | 17  |  |
| 2770 | K51572 | SRR3320324 | CC17 | carrier | Kenya | III | 2011 | 484 |  |
| 2771 | K51527 | SRR3320323 | CC19 | carrier | Kenya | III | 2011 | 182 |  |
| 2772 | K51526 | SRR3320322 | CC1  | carrier | Kenya | II  | 2011 | 1   |  |
| 2773 | K51525 | SRR3320321 | CC19 | carrier | Kenya | II  | 2011 | 28  |  |
| 2774 | K51478 | SRR3320320 | CC23 | carrier | Kenya | la  | 2011 | 23  |  |
| 2775 | K51463 | SRR3320319 | CC10 | carrier | Kenya | lb  | 2011 | 8   |  |
| 2776 | K51420 | SRR3320318 | CC1  | carrier | Kenya | V   | 2011 | 796 |  |
| 2777 | K51361 | SRR3320317 | CC10 | carrier | Kenya | lb  | 2011 | 10  |  |
| 2778 | K51349 | SRR3320316 | CC1  | carrier | Kenya | IV  | 2011 | 196 |  |
| 2779 | K51348 | SRR3320315 | CC17 | carrier | Kenya | III | 2011 | 484 |  |
| 2780 | K51329 | SRR3320314 | CC23 | carrier | Kenya | la  | 2011 | 23  |  |
| 2781 | K51319 | SRR3320313 | CC1  | carrier | Kenya | IV  | 2011 | 196 |  |
| 2782 | K51318 | SRR3320312 | CC1  | carrier | Kenya | II  | 2011 | 2   |  |
| 2783 | K51280 | SRR3320311 | CC19 | carrier | Kenya | II  | 2011 | 28  |  |
| 2784 | K51261 | SRR3320310 | CC10 | carrier | Kenya | lb  | 2011 | 8   |  |
| 2785 | K51260 | SRR3320309 | CC17 | carrier | Kenya | III | 2011 | 17  |  |
| 2786 | K51258 | SRR3320308 | CC1  | carrier | Kenya | V   | 2011 | 1   |  |
| 2787 | K51257 | SRR3320307 | CC23 | carrier | Kenya | la  | 2011 | 23  |  |
| 2788 | K51256 | SRR3320306 | CC19 | carrier | Kenya | III | 2011 | 182 |  |
| 2789 | K51255 | SRR3320305 | CC23 | carrier | Kenya | la  | 2011 | 802 |  |
| 2790 | K51230 | SRR3320304 | CC10 | carrier | Kenya | lb  | 2011 | 10  |  |
| 2791 | K51216 | SRR3320303 | CC19 | carrier | Kenya | II  | 2011 | 28  |  |
| 2792 | K51201 | SRR3320302 | CC17 | carrier | Kenya | III | 2011 | 17  |  |
| 2793 | K51175 | SRR3320301 | CC23 | carrier | Kenya | la  | 2011 | 23  |  |
| 2794 | K51157 | SRR3320300 | CC19 | carrier | Kenya | III | 2011 | 182 |  |
| 2795 | K51139 | SRR3320299 | CC10 | carrier | Kenya | NT  | 2011 | 8   |  |
| 2796 | K51133 | SRR3320298 | CC19 | carrier | Kenya | V   | 2011 | 327 |  |
| 2797 | K51118 | SRR3320297 | CC19 | carrier | Kenya | III | 2011 | 182 |  |
| 2798 | K51091 | SRR3320296 | CC17 | carrier | Kenya | III | 2011 | 17  |  |
| 2799 | K50972 | SRR3320295 | CC17 | carrier | Kenya | III | 2011 | 17  |  |
| 2800 | K50939 | SRR3320294 | CC19 | carrier | Kenya | III | 2011 | 182 |  |
| 2801 | K50938 | SRR3320293 | CC23 | carrier | Kenya | la  | 2011 | 23  |  |
| 2802 | K50909 | SRR3320292 | CC10 | carrier | Kenya | lb  | 2011 | 10  |  |
| 2803 | K50877 | SRR3320291 | CC17 | carrier | Kenya | III | 2011 | 784 |  |
| 2804 | K50864 | SRR3320290 | CC10 | carrier | Kenya | lb  | 2011 | 10  |  |
| 2805 | K50827 | SRR3320289 | CC19 | carrier | Kenya | II  | 2011 | 28  |  |
| 2806 | K50826 | SRR3320288 | CC19 | carrier | Kenya | II  | 2011 | 28  |  |
| 2807 | K50792 | SRR3320287 | CC17 | carrier | Kenya | III | 2011 | 17  |  |
| 2808 | K50791 | SRR3320286 | CC17 | carrier | Kenya | III | 2011 | 17  |  |
| 2809 | K50790 | SRR3320285 | CC23 | carrier | Kenya | la  | 2011 | 23  |  |
| 2810 | K50725 | SRR3320284 | CC23 | carrier | Kenya | la  | 2011 | 23  |  |
| 2811 | K50724 | SRR3320283 | CC17 | carrier | Kenya | III | 2011 | 17  |  |
| 2812 | K50709 | SRR3320282 | CC17 | carrier | Kenya | III | 2011 | 484 |  |
| 2813 | K50708 | SRR3320281 | CC23 | carrier | Kenya | la  | 2011 | 23  |  |
| 2814 | K50669 | SRR3320280 | CC1  | carrier | Kenya | IV  | 2011 | 196 |  |
| 2815 | K50525 | SRR3320279 | CC10 | carrier | Kenya | lb  | 2011 | 8   |  |
| 2816 | K50492 | SRR3320278 | CC23 | carrier | Kenya | la  | 2011 | 23  |  |
| 2817 | K50466 | SRR3320277 | CC17 | carrier | Kenya | III | 2011 | 788 |  |
| 2818 | K50442 | SRR3320276 | CC10 | carrier | Kenya | lb  | 2011 | 8   |  |
| 2819 | K50441 | SRR3320275 | CC17 | carrier | Kenya | III | 2011 | 17  |  |
| 2820 | K50426 | SRR3320274 | CC19 | carrier | Kenya | III | 2011 | 182 |  |
| 2821 | K50415 | SRR3320273 | CC1  | carrier | Kenya | V   | 2011 | 1   |  |
| 2822 | K50414 | SRR3320272 | CC17 | carrier | Kenya | III | 2011 | 17  |  |
| 2823 | K50387 | SRR3320271 | CC10 | carrier | Kenya | lb  | 2011 | 10  |  |
| 2824 | K50365 | SRR3320270 | CC10 | carrier | Kenya | lb  | 2011 | 8   |  |
| 2825 | K50364 | SRR3320269 | CC19 | carrier | Kenya | V   | 2011 | 327 |  |
| 2826 | K50342 | SRR3320268 | CC23 | carrier | Kenya | la  | 2011 | 23  |  |
| 2827 | K50227 | SRR3320267 | CC1  | carrier | Kenya | V   | 2011 | 796 |  |
| 2828 | K50223 | SRR3320266 | CC17 | carrier | Kenya | III | 2011 | 17  |  |
| 2829 | K50222 | SRR3320265 | CC19 | carrier | Kenya | III | 2011 | 182 |  |

|      |        |            |      |          |       |     |      |     |  |
|------|--------|------------|------|----------|-------|-----|------|-----|--|
| 2830 | K50167 | SRR3320264 | CC19 | carrier  | Kenya | III | 2011 | 182 |  |
| 2831 | K50146 | SRR3320263 | CC17 | carrier  | Kenya | III | 2011 | 484 |  |
| 2832 | K50145 | SRR3320262 | CC23 | carrier  | Kenya | Ia  | 2011 | 23  |  |
| 2833 | K50144 | SRR3320261 | CC10 | carrier  | Kenya | Ib  | 2011 | 8   |  |
| 2834 | K50143 | SRR3320260 | CC19 | carrier  | Kenya | III | 2011 | 182 |  |
| 2835 | K50142 | SRR3320259 | CC17 | carrier  | Kenya | III | 2011 | 484 |  |
| 2836 | K50140 | SRR3320258 | CC17 | carrier  | Kenya | III | 2011 | 17  |  |
| 2837 | K50057 | SRR3320257 | CC17 | carrier  | Kenya | III | 2011 | 484 |  |
| 2838 | K50009 | SRR3320256 | CC19 | carrier  | Kenya | V   | 2011 | 327 |  |
| 2839 | K50008 | SRR3320255 | CC19 | carrier  | Kenya | II  | 2011 | 28  |  |
| 2840 | K50007 | SRR3320254 | CC19 | carrier  | Kenya | III | 2011 | 19  |  |
| 2841 | K50006 | SRR3320253 | CC19 | carrier  | Kenya | II  | 2011 | 28  |  |
| 2842 | K49986 | SRR3320252 | CC19 | carrier  | Kenya | III | 2011 | 19  |  |
| 2843 | K49981 | SRR3320251 | CC17 | carrier  | Kenya | III | 2011 | 17  |  |
| 2844 | K49970 | SRR3320250 | CC17 | carrier  | Kenya | III | 2011 | 17  |  |
| 2845 | K49969 | SRR3320249 | CC1  | carrier  | Kenya | V   | 2011 | 1   |  |
| 2846 | K49965 | SRR3320248 | CC17 | carrier  | Kenya | III | 2011 | 17  |  |
| 2847 | K49933 | SRR3320247 | CC17 | carrier  | Kenya | III | 2011 | 484 |  |
| 2848 | K49931 | SRR3320246 | CC23 | carrier  | Kenya | Ia  | 2011 | 23  |  |
| 2849 | K49917 | SRR3320245 | CC23 | carrier  | Kenya | Ia  | 2011 | 23  |  |
| 2850 | K49870 | SRR3320244 | CC10 | carrier  | Kenya | Ib  | 2011 | 10  |  |
| 2851 | K49839 | SRR3320243 | CC19 | carrier  | Kenya | III | 2011 | 19  |  |
| 2852 | K49831 | SRR3320242 | CC17 | carrier  | Kenya | III | 2011 | 484 |  |
| 2853 | K49793 | SRR3320241 | CC23 | carrier  | Kenya | Ia  | 2011 | 23  |  |
| 2854 | K49791 | SRR3320240 | CC23 | carrier  | Kenya | Ia  | 2011 | 23  |  |
| 2855 | K49768 | SRR3320239 | CC19 | carrier  | Kenya | II  | 2011 | 28  |  |
| 2856 | K49740 | SRR3320238 | CC17 | carrier  | Kenya | III | 2011 | 17  |  |
| 2857 | K49739 | SRR3320237 | CC10 | carrier  | Kenya | Ib  | 2011 | 8   |  |
| 2858 | K49738 | SRR3320236 | CC17 | carrier  | Kenya | III | 2011 | 484 |  |
| 2859 | K23965 | SRR3320235 | CC17 | invasive | Kenya | III | 2007 | 17  |  |
| 2860 | K23286 | SRR3320234 | CC23 | invasive | Kenya | Ia  | 2007 | 23  |  |
| 2861 | K20349 | SRR3320233 | CC17 | invasive | Kenya | III | 2006 | 17  |  |
| 2862 | K20332 | SRR3320232 | CC17 | invasive | Kenya | III | 2006 | 17  |  |
| 2863 | K20251 | SRR3320231 | CC10 | invasive | Kenya | Ib  |      | 804 |  |
| 2864 | K20230 | SRR3320230 | CC10 | invasive | Kenya | Ib  | 2006 | 8   |  |
| 2865 | K20019 | SRR3320229 | CC17 | invasive | Kenya | III | 2006 | 17  |  |
| 2866 | K19924 | SRR3320228 | CC17 | invasive | Kenya | III | 2006 | 484 |  |
| 2867 | K19244 | SRR3320227 | CC17 | invasive | Kenya | III | 2006 | 17  |  |
| 2868 | K19212 | SRR3320226 | CC17 | invasive | Kenya | III | 2006 | 17  |  |
| 2869 | K19170 | SRR3320225 | N/D  | invasive | Kenya | Ia  | 2006 | 803 |  |
| 2870 | K18723 | SRR3320224 | CC17 | invasive | Kenya | III | 2006 | 484 |  |
| 2871 | K17900 | SRR3320223 | CC17 | invasive | Kenya | III | 2006 | 17  |  |
| 2872 | K17897 | SRR3320222 | CC17 | invasive | Kenya | III | 2006 | 147 |  |
| 2873 | K17389 | SRR3320221 | CC17 | invasive | Kenya | III | 2005 | 17  |  |
| 2874 | K17308 | SRR3320220 | CC17 | invasive | Kenya | III | 2005 | 17  |  |
| 2875 | K17224 | SRR3320219 | CC1  | invasive | Kenya | IV  | 2005 | 196 |  |
| 2876 | K17110 | SRR3320218 | CC17 | invasive | Kenya | III | 2005 | 17  |  |
| 2877 | K16827 | SRR3320217 | CC10 | invasive | Kenya | Ib  | 2005 | 10  |  |
| 2878 | K16755 | SRR3320216 | CC17 | invasive | Kenya | III | 2005 | 17  |  |
| 2879 | K16534 | SRR3320215 | CC17 | invasive | Kenya | III | 2005 | 17  |  |
| 2880 | K14206 | SRR3320214 | CC17 | invasive | Kenya | III | 2005 | 17  |  |
| 2881 | K13758 | SRR3320213 | CC17 | invasive | Kenya | III | 2004 | 17  |  |
| 2882 | K11385 | SRR3320212 | CC17 | invasive | Kenya | III | 2003 | 17  |  |
| 2883 | K59563 | SRR3320211 | CC17 | invasive | Kenya | III | 2012 | 17  |  |
| 2884 | K57810 | SRR3320210 | CC17 | invasive | Kenya | III | 2012 | 17  |  |
| 2885 | K57085 | SRR3320209 | CC17 | invasive | Kenya | III | 2012 | 17  |  |
| 2886 | K57018 | SRR3320208 | CC1  | invasive | Kenya | II  | 2012 | 2   |  |
| 2887 | K10268 | SRR3320207 | CC17 | invasive | Kenya | III | 2003 | 17  |  |
| 2888 | K56640 | SRR3320206 | CC17 | invasive | Kenya | III | 2012 | 17  |  |
| 2889 | K55826 | SRR3320205 | CC17 | invasive | Kenya | III | 2012 | 17  |  |
| 2890 | K55813 | SRR3320204 | CC17 | invasive | Kenya | III | 2012 | 17  |  |
| 2891 | K9182  | SRR3320203 | CC17 | invasive | Kenya | III | 2002 | 17  |  |

|      |         |            |      |          |        |     |      |     |            |
|------|---------|------------|------|----------|--------|-----|------|-----|------------|
| 2892 | K52758  | SRR3320202 | CC23 | invasive | Kenya  | la  | 2012 | 23  |            |
| 2893 | K8568   | SRR3320201 | CC23 | invasive | Kenya  | la  | 2002 | 23  |            |
| 2894 | K8555   | SRR3320200 | CC17 | invasive | Kenya  | III | 2002 | 17  |            |
| 2895 | K8309   | SRR3320199 | CC17 | invasive | Kenya  | III | 2002 | 17  |            |
| 2896 | K50468  | SRR3320198 | CC17 | invasive | Kenya  | III |      | 792 |            |
| 2897 | K7834   | SRR3320197 | CC10 | invasive | Kenya  | lb  | 2001 | 10  |            |
| 2898 | K48612  | SRR3320196 | CC17 | invasive | Kenya  | III | 2011 | 484 |            |
| 2899 | K7453   | SRR3320195 | CC19 | invasive | Kenya  | III | 2001 | 19  |            |
| 2900 | K48051  | SRR3320194 | CC17 | invasive | Kenya  | III | 2011 | 17  |            |
| 2901 | K7229   | SRR3320193 | CC17 | invasive | Kenya  | III | 2001 | 17  |            |
| 2902 | K47340  | SRR3320192 | CC17 | invasive | Kenya  | III | 2011 | 484 |            |
| 2903 | K7129   | SRR3320191 | CC23 | invasive | Kenya  | la  | 2001 | 23  |            |
| 2904 | K6781   | SRR3320190 | CC23 | invasive | Kenya  | la  | 2001 | 23  |            |
| 2905 | K45678  | SRR3320189 | CC17 | invasive | Kenya  | III | 2010 | 17  |            |
| 2906 | K6666   | SRR3320188 | CC17 | invasive | Kenya  | III | 2000 | 484 |            |
| 2907 | K6625   | SRR3320187 | CC17 | invasive | Kenya  | III | 2000 | 17  |            |
| 2908 | K6245   | SRR3320186 | CC17 | invasive | Kenya  | III | 2000 | 17  |            |
| 2909 | K6234   | SRR3320185 | CC17 | invasive | Kenya  | III | 2000 | 17  |            |
| 2910 | K6229   | SRR3320184 | CC17 | invasive | Kenya  | III | 2000 | 17  |            |
| 2911 | K6209   | SRR3320183 | CC23 | invasive | Kenya  | la  | 2000 | 23  |            |
| 2912 | K5666   | SRR3320182 | CC23 | invasive | Kenya  | la  | 2000 | 23  |            |
| 2913 | K5136   | SRR3320181 | CC17 | invasive | Kenya  | III | 1999 | 17  |            |
| 2914 | K4958   | SRR3320180 | CC17 | invasive | Kenya  | III | 1999 | 17  |            |
| 2915 | K39258  | SRR3320179 | CC17 | invasive | Kenya  | III | 2009 | 484 |            |
| 2916 | K38783  | SRR3320178 | CC17 | invasive | Kenya  | III | 2009 | 17  |            |
| 2917 | K36829  | SRR3320177 | CC17 | invasive | Kenya  | III | 2009 | 484 |            |
| 2918 | K4436   | SRR3320176 | CC23 | invasive | Kenya  | la  | 1999 | 23  |            |
| 2919 | K4340   | SRR3320175 | CC17 | invasive | Kenya  | III | 1999 | 17  |            |
| 2920 | K36235  | SRR3320174 | CC19 | invasive | Kenya  | III | 2009 | 182 |            |
| 2921 | K36205  | SRR3320173 | CC19 | invasive | Kenya  | III | 2009 | 182 |            |
| 2922 | K35752  | SRR3320172 | CC10 | invasive | Kenya  | lb  | 2008 | 8   |            |
| 2923 | K3931   | SRR3320171 | CC23 | invasive | Kenya  | la  | 1998 | 23  |            |
| 2924 | K33921  | SRR3320170 | CC17 | invasive | Kenya  | III | 2008 | 17  |            |
| 2925 | K3605   | SRR3320169 | CC17 | invasive | Kenya  | III | 1998 | 17  |            |
| 2926 | K33534  | SRR3320168 | CC17 | invasive | Kenya  | III | 2008 | 17  |            |
| 2927 | K31176  | SRR3320167 | CC17 | invasive | Kenya  | III | 2008 | 17  |            |
| 2928 | K28931  | SRR3320166 | CC17 | invasive | Kenya  | III | 2008 | 17  |            |
| 2929 | K28764  | SRR3320165 | CC23 | invasive | Kenya  | la  | 2008 | 23  |            |
| 2930 | K25271  | SRR3320164 | CC19 | invasive | Kenya  | III | 2007 | 182 |            |
| 3018 | LZC0821 |            | CC23 | carrier  | Malawi | V   |      | 223 | ERR1910505 |
| 3019 | LZC3113 |            | CC19 | carrier  | Malawi | III |      | 182 | ERR1910506 |
| 3021 | B17570  |            | N/D  | invasive | Malawi | II  |      |     | ERR1910508 |
| 3022 | LZA8818 |            | CC23 | carrier  | Malawi | la  |      | 23  | ERR1910509 |
| 3025 | LZC3822 |            | CC23 | carrier  | Malawi | V   |      | 223 | ERR1910512 |
| 3027 | LZC7155 |            | CC17 | carrier  | Malawi | III |      | 17  | ERR1910514 |
| 3028 | BKQ2CT  |            | CC23 | invasive | Malawi | la  |      | 23  | ERR1910515 |
| 3029 | LZA9312 |            | CC19 | carrier  | Malawi | III |      | 19  | ERR1910516 |
| 3030 | BKR2A0  |            | N/D  | invasive | Malawi | III |      |     | ERR1910517 |
| 3032 | D34169  |            | CC19 | invasive | Malawi | V   |      | 327 | ERR1910519 |
| 3033 | D31559  |            | CC17 | invasive | Malawi | III |      | 17  | ERR1910520 |
| 3034 | LZE6322 |            | N/D  | unknown  | Malawi | NT  |      |     | ERR1910521 |
| 3035 | BKR25R  |            | CC17 | invasive | Malawi | III |      | 866 | ERR1910522 |
| 3036 | LZE9626 |            | CC19 | carrier  | Malawi | III |      | 182 | ERR1910523 |
| 3037 | LZA8762 |            | CC23 | carrier  | Malawi | la  |      | 23  | ERR1910524 |
| 3038 | LZC4964 |            | CC17 | carrier  | Malawi | III |      | 17  | ERR1910525 |
| 3040 | LZE8310 |            | CC23 | carrier  | Malawi | NT  |      | 23  | ERR1910527 |
| 3041 | LZC5852 |            | CC17 | carrier  | Malawi | III |      | 17  | ERR1910528 |
| 3043 | LZE9097 |            | CC23 | carrier  | Malawi | V   |      | 23  | ERR1910530 |
| 3044 | LZE8393 |            | CC17 | carrier  | Malawi | III |      | 866 | ERR1910531 |
| 3046 | 1029448 |            | CC17 | invasive | Malawi | III |      | 17  | ERR1910533 |
| 3047 | LZE0977 |            | CC23 | carrier  | Malawi | la  |      | 23  | ERR1910534 |
| 3048 | 1037160 |            | CC19 | invasive | Malawi | V   |      | 327 | ERR1910535 |

|      |         |      |          |        |     |  |     |            |
|------|---------|------|----------|--------|-----|--|-----|------------|
| 3050 | LZE7243 | CC19 | carrier  | Malawi | III |  | 182 | ERR1910537 |
| 3051 | BCN134  | CC23 | invasive | Malawi | Ia  |  | 23  | ERR1910538 |
| 3052 | LZC6769 | CC23 | carrier  | Malawi | Ia  |  | 23  | ERR1910539 |
| 3053 | D26167  | CC17 | invasive | Malawi | III |  | 17  | ERR1910540 |
| 3054 | BKQCW3  | CC17 | invasive | Malawi | III |  | 17  | ERR1910541 |
| 3056 | LZE4647 | CC23 | carrier  | Malawi | V   |  | 223 | ERR1910543 |
| 3058 | LZE7260 | CC17 | carrier  | Malawi | III |  | 17  | ERR1910545 |
| 3060 | LZC4270 | CC23 | carrier  | Malawi | V   |  | 223 | ERR1910547 |
| 3061 | LZA9667 | CC23 | carrier  | Malawi | Ia  |  | 23  | ERR1910548 |
| 3062 | LZE6179 | CC23 | unknown  | Malawi | V   |  | 223 | ERR1910549 |
| 3063 | D36128  | CC17 | invasive | Malawi | III |  | 17  | ERR1910550 |
| 3064 | D34047  | N/D  | invasive | Malawi | V   |  |     | ERR1910551 |
| 3065 | LZE0969 | CC23 | carrier  | Malawi | Ia  |  | 23  | ERR1910552 |
| 3066 | LZC5480 | CC17 | carrier  | Malawi | III |  | 17  | ERR1910553 |
| 3068 | LZE1214 | CC17 | carrier  | Malawi | III |  | 17  | ERR1910555 |
| 3069 | LZA4841 | CC23 | carrier  | Malawi | Ia  |  | 23  | ERR1910556 |
| 3070 | LZC2799 | CC19 | carrier  | Malawi | V   |  | 327 | ERR1910557 |
| 3071 | LZE8125 | CC23 | carrier  | Malawi | Ia  |  | 23  | ERR1910558 |
| 3072 | LZE6689 | CC23 | carrier  | Malawi | NT  |  | 23  | ERR1910559 |
| 3073 | LZA4972 | CC23 | carrier  | Malawi | Ia  |  | 23  | ERR1910560 |
| 3074 | LZE6242 | CC23 | carrier  | Malawi | NT  |  | 23  | ERR1910561 |
| 3075 | LZE9208 | CC19 | carrier  | Malawi | V   |  | 327 | ERR1910562 |
| 3076 | C12087  | CC17 | invasive | Malawi | III |  | 17  | ERR1910563 |
| 3077 | D32852  | CC10 | invasive | Malawi | II  |  | 10  | ERR1910564 |
| 3078 | LZE8711 | CC23 | carrier  | Malawi | Ia  |  | 802 | ERR1910565 |
| 3079 | BKR239  | CC17 | invasive | Malawi | III |  | 866 | ERR1910566 |
| 3080 | D33484  | CC19 | invasive | Malawi | V   |  | 327 | ERR1910567 |
| 3081 | LZC8192 | CC23 | carrier  | Malawi | Ia  |  | 23  | ERR1910568 |
| 3082 | LZE8674 | CC19 | carrier  | Malawi | III |  | 182 | ERR1910569 |
| 3083 | LZE7286 | CC23 | carrier  | Malawi | V   |  | 24  | ERR1910570 |
| 3085 | LZE6881 | CC17 | carrier  | Malawi | III |  | 17  | ERR1910572 |
| 3087 | LZA7325 | CC19 | carrier  | Malawi | III |  | 19  | ERR1910574 |
| 3088 | D53208  | CC17 | invasive | Malawi | III |  | 17  | ERR1910575 |
| 3089 | LZC9860 | CC23 | carrier  | Malawi | V   |  | 223 | ERR1910576 |
| 3090 | BKR5LM  | CC17 | invasive | Malawi | III |  | 17  | ERR1910577 |
| 3093 | ZAE877  | CC19 | invasive | Malawi | V   |  | 327 | ERR1910580 |
| 3095 | LZE9257 | CC19 | carrier  | Malawi | III |  | 182 | ERR1910582 |
| 3096 | LQX0032 | CC23 | carrier  | Malawi | Ia  |  | 23  | ERR1910583 |
| 3098 | LZE8424 | CC19 | carrier  | Malawi | V   |  | 327 | ERR1910585 |
| 3099 | LZC4655 | CC19 | carrier  | Malawi | V   |  | 19  | ERR1910586 |
| 3100 | LZE6630 | CC19 | unknown  | Malawi | V   |  | 327 | ERR1910587 |
| 3102 | LZE8553 | CC23 | carrier  | Malawi | Ia  |  | 23  | ERR1910589 |
| 3103 | D32743  | CC17 | invasive | Malawi | III |  | 17  | ERR1910590 |
| 3105 | LZE9136 | CC23 | carrier  | Malawi | Ia  |  | 23  | ERR1910592 |
| 3107 | C15370  | CC17 | invasive | Malawi | III |  | 17  | ERR1910594 |
| 3109 | LZE4702 | CC23 | carrier  | Malawi | Ia  |  | 23  | ERR1910596 |
| 3110 | LZE6988 | CC19 | carrier  | Malawi | III |  | 19  | ERR1910597 |
| 3111 | LZC4930 | CC17 | carrier  | Malawi | III |  | 17  | ERR1910598 |
| 3112 | LZE6146 | CC10 | carrier  | Malawi | Ib  |  | 10  | ERR1910599 |
| 3113 | LZA6701 | CC17 | carrier  | Malawi | III |  | 17  | ERR1910600 |
| 3114 | LZE4270 | CC23 | carrier  | Malawi | V   |  | 223 | ERR1910601 |
| 3115 | LZE9273 | CC19 | carrier  | Malawi | III |  | 182 | ERR1910602 |
| 3116 | LZE8264 | CC10 | carrier  | Malawi | NT  |  | 8   | ERR1910603 |
| 3117 | LZE9595 | CC19 | carrier  | Malawi | NT  |  | 327 | ERR1910604 |
| 3118 | LZE9683 | CC23 | carrier  | Malawi | V   |  | 223 | ERR1910605 |
| 3119 | LZE8711 | CC23 | carrier  | Malawi | Ia  |  | 802 | ERR1910606 |
| 3120 | LZC7585 | CC17 | carrier  | Malawi | III |  | 17  | ERR1910607 |
| 3122 | LZC7616 | CC17 | carrier  | Malawi | III |  | 17  | ERR1910609 |
| 3125 | LZE9520 | CC23 | carrier  | Malawi | Ia  |  | 23  | ERR1910612 |
| 3126 | LZC7083 | CC17 | carrier  | Malawi | III |  | 17  | ERR1910613 |
| 3127 | D28060  | CC17 | invasive | Malawi | III |  | 17  | ERR1910614 |
| 3129 | D32479  | CC17 | invasive | Malawi | III |  | 17  | ERR1910616 |



|      |           |      |          |        |     |  |     |            |
|------|-----------|------|----------|--------|-----|--|-----|------------|
| 3131 | D30738    | CC17 | invasive | Malawi | III |  | 109 | ERR1910618 |
| 3132 | LABZAE908 | CC10 | carrier  | Malawi | Ib  |  | 8   | ERR1910619 |
| 3133 | D40064    | CC17 | invasive | Malawi | III |  | 17  | ERR1910620 |
| 3134 | LZC1351   | CC23 | carrier  | Malawi | Ia  |  | 23  | ERR1910621 |
| 3135 | LZC5367   | CC23 | carrier  | Malawi | V   |  | 223 | ERR1910622 |
| 3136 | C11861    | CC17 | invasive | Malawi | III |  | 17  | ERR1910623 |
| 3138 | LZC3806   | CC19 | carrier  | Malawi | V   |  | 327 | ERR1910625 |
| 3139 | LZE4288 A | CC23 | unknown  | Malawi | V   |  | 223 | ERR1910626 |
| 3140 | 1038262   | CC17 | invasive | Malawi | III |  | 17  | ERR1910627 |
| 3141 | LZA5406   | CC17 | carrier  | Malawi | III |  | 17  | ERR1910628 |
| 3142 | D26122    | CC10 | invasive | Malawi | Ib  |  | 8   | ERR1910629 |
| 3143 | D31951    | CC17 | invasive | Malawi | III |  | 17  | ERR1910630 |
| 3144 | LZC3558   | CC19 | carrier  | Malawi | III |  | 182 | ERR1910631 |
| 3145 | 4Cath     | N/D  | invasive | Malawi | II  |  |     | ERR1910632 |
| 3146 | LZC5375   | CC10 | carrier  | Malawi | Ib  |  | 10  | ERR1910633 |
| 3147 | LZC1982   | CC19 | carrier  | Malawi | NT  |  | 327 | ERR1910634 |
| 3148 | LZE6912   | CC17 | carrier  | Malawi | III |  | 17  | ERR1910635 |
| 3149 | D29545    | CC10 | invasive | Malawi | Ib  |  | 8   | ERR1910636 |
| 3151 | D43024    | CC17 | invasive | Malawi | III |  | 17  | ERR1910638 |
| 3152 | D31483    | CC17 | invasive | Malawi | III |  | 17  | ERR1910639 |
| 3153 | LZE0686   | CC23 | carrier  | Malawi | V   |  | 223 | ERR1910640 |
| 3154 | C14639    | CC17 | invasive | Malawi | III |  | 109 | ERR1910641 |
| 3155 | LZA8795   | CC10 | carrier  | Malawi | NT  |  | 8   | ERR1910642 |
| 3156 | BKQG72    | CC17 | invasive | Malawi | III |  | 17  | ERR1910643 |
| 3158 | C16147    | CC17 | invasive | Malawi | III |  | 17  | ERR1910645 |
| 3159 | C19342    | CC17 | invasive | Malawi | III |  | 17  | ERR1910646 |
| 3160 | LZC5498   | CC17 | carrier  | Malawi | III |  | 17  | ERR1910647 |
| 3161 | D33035    | CC17 | invasive | Malawi | III |  | 17  | ERR1910648 |
| 3162 | LZC1773   | CC19 | carrier  | Malawi | V   |  | 327 | ERR1910649 |
| 3163 | LZE1046   | CC17 | carrier  | Malawi | III |  | 17  | ERR1910650 |
| 3164 | LZE4288 B | CC23 | unknown  | Malawi | V   |  | 223 | ERR1910651 |
| 3165 | LZA7753   | CC23 | carrier  | Malawi | Ia  |  | 23  | ERR1910652 |
| 3166 | LZE6769   | CC19 | carrier  | Malawi | V   |  | 327 | ERR1910653 |
| 3167 | LZE8002   | CC23 | carrier  | Malawi | Ia  |  | 23  | ERR1910654 |
| 3168 | BKQFT6    | CC17 | invasive | Malawi | III |  | 17  | ERR1910655 |
| 3169 | LABZAC037 | CC23 | carrier  | Malawi | NT  |  | 23  | ERR1910656 |
| 3170 | LZE9546   | CC10 | carrier  | Malawi | II  |  | 10  | ERR1910657 |
| 3172 | C17639    | CC17 | invasive | Malawi | III |  | 17  | ERR1910659 |
| 3173 | BKQFUX    | CC23 | invasive | Malawi | Ia  |  | 23  | ERR1910660 |
| 3174 | BKQ51E    | CC23 | invasive | Malawi | Ia  |  | 23  | ERR1910661 |
| 3175 | D31110    | CC23 | invasive | Malawi | Ia  |  | 23  | ERR1910662 |
| 3176 | LZC5318   | CC17 | carrier  | Malawi | III |  | 866 | ERR1910663 |
| 3179 | D28851    | CC17 | invasive | Malawi | III |  | 17  | ERR1910666 |
| 3180 | CI7628    | CC17 | invasive | Malawi | III |  | 17  | ERR1910667 |
| 3181 | LZA5220   | CC23 | carrier  | Malawi | Ia  |  | 23  | ERR1910668 |
| 3182 | LZE9030   | CC19 | unknown  | Malawi | V   |  | 327 | ERR1910669 |
| 3184 | LZC5713   | CC10 | carrier  | Malawi | Ib  |  | 10  | ERR1910671 |
| 3186 | C16300    | CC23 | invasive | Malawi | Ia  |  | 23  | ERR1910673 |
| 3187 | A49324    | CC19 | invasive | Malawi | V   |  | 327 | ERR1910674 |
| 3188 | LZA6710   | CC10 | carrier  | Malawi | Ib  |  | 8   | ERR1910675 |
| 3189 | LZG1247   | CC17 | carrier  | Malawi | III |  | 17  | ERR1910676 |
| 3190 | D33180    | CC17 | invasive | Malawi | III |  | 17  | ERR1910677 |
| 3191 | D35616    | CC17 | invasive | Malawi | III |  | 866 | ERR1910678 |
| 3192 | LZA8512   | CC17 | carrier  | Malawi | III |  | 17  | ERR1910679 |
| 3193 | BKQE3J    | CC17 | invasive | Malawi | III |  | 17  | ERR1910680 |
| 3194 | LZE1003   | CC17 | carrier  | Malawi | III |  | 17  | ERR1910681 |
| 3195 | BKR3ZB    | CC17 | invasive | Malawi | III |  | 17  | ERR1910682 |
| 3196 | D38101    | CC17 | invasive | Malawi | III |  | 17  | ERR1910683 |
| 3197 | LZA7294   | CC23 | carrier  | Malawi | NT  |  | 23  | ERR1910684 |
| 3198 | BHA5YQ    | N/D  | invasive | Malawi | III |  |     | ERR1910685 |
| 3199 | BKR3EZ    | N/D  | invasive | Malawi | III |  |     | ERR1910686 |
| 3200 | LZC1610   | CC23 | carrier  | Malawi | Ia  |  | 23  | ERR1910687 |

|                          |      |          |         |     |      |  |     |            |
|--------------------------|------|----------|---------|-----|------|--|-----|------------|
| 3201 BKQ8W8              | CC17 | invasive | Malawi  | III |      |  | 17  | ERR1910688 |
| 3202 LZC1556             | CC23 | carrier  | Malawi  | V   |      |  | 223 | ERR1910689 |
| 3203 A59952              | CC19 | invasive | Malawi  | V   |      |  | 327 | ERR1910690 |
| 3204 BKQ74D              | CC23 | invasive | Malawi  | Ia  |      |  | 23  | ERR1910691 |
| 3205 D33407              | CC23 | invasive | Malawi  | Ia  |      |  | 23  | ERR1910692 |
| 974 NETGBS STREPCAR 7    | CC19 | carrier  | Malawi  | V   | 2008 |  | 327 | ERR840658  |
| 975 NETGBS STREPCAR 1586 | CC23 | carrier  | Malawi  | Ia  | 2010 |  | 23  | ERR840659  |
| 976 NETGBS STREPCAR 15   | CC23 | carrier  | Malawi  | Ia  | 2008 |  | 23  | ERR840660  |
| 977 NETGBS STREPCAR 1607 | CC23 | carrier  | Malawi  | V   | 2010 |  | 223 | ERR840661  |
| 978 NETGBS STREPCAR 22   | CC23 | carrier  | Malawi  | V   | 2008 |  | 24  | ERR840662  |
| 979 NETGBS STREPCAR 1615 | N/D  | carrier  | Malawi  | V   | 2010 |  |     | ERR840663  |
| 981 NETGBS STREPCAR 1622 | CC23 | carrier  | Malawi  | Ia  | 2010 |  | 23  | ERR840665  |
| 982 NETGBS STREPCAR 35   | CC17 | carrier  | Malawi  | III | 2008 |  | 17  | ERR840666  |
| 983 NETGBS STREPCAR 1640 | CC23 | carrier  | Malawi  | V   | 2010 |  | 223 | ERR840667  |
| 984 NETGBS STREPCAR 39   | CC23 | carrier  | Malawi  | V   | 2008 |  | 223 | ERR840668  |
| 985 NETGBS STREPCAR 1645 | CC17 | carrier  | Malawi  | III | 2010 |  | 17  | ERR840669  |
| 986 NETGBS STREPCAR 40   | CC23 | carrier  | Malawi  | Ia  | 2008 |  | 23  | ERR840670  |
| 987 NETGBS STREPCAR 1699 | CC17 | carrier  | Malawi  | III | 2010 |  | 17  | ERR840671  |
| 989 NETGBS STREPCAR 1720 | CC17 | carrier  | Malawi  | III | 2010 |  | 17  | ERR840673  |
| 990 NETGBS STREPCAR 72   | CC19 | carrier  | Malawi  | III | 2008 |  | 19  | ERR840674  |
| 991 NETGBS STREPCAR 1721 | CC17 | carrier  | Malawi  | III | 2010 |  | 17  | ERR840675  |
| 992 NETGBS STREPCAR 83   | CC19 | carrier  | Malawi  | III | 2008 |  | 19  | ERR840676  |
| 993 NETGBS D25677        | CC17 | invasive | Malawi  | III | 2004 |  | 109 | ERR840677  |
| 994 NETGBS STREPCAR 89   | CC17 | carrier  | Malawi  | III | 2008 |  | 17  | ERR840678  |
| 995 NETGBS D25889        | CC23 | invasive | Malawi  | Ia  | 2004 |  | 23  | ERR840679  |
| 996 NETGBS STREPCAR 112  | CC17 | carrier  | Malawi  | III | 2008 |  | 866 | ERR840680  |
| 998 NETGBS STREPCAR 115  | CC17 | carrier  | Malawi  | III | 2008 |  | 17  | ERR840682  |
| 999 NETGBS D26173        | CC23 | invasive | Malawi  | Ia  | 2004 |  | 23  | ERR840683  |
| 1173 GD201008 001        | CC6  | animal   | Unknown | Ia  |      |  | 7   |            |
| 1174 FSL S3 026          | CC17 | animal   | Unknown | NT  |      |  | 67  |            |
| 1205 CCUG 34230          | CC23 | animal   | Germany | III | 1995 |  | 23  |            |
| 1230 CF01173             | CC6  | animal   | Unknown | NT  |      |  | 7   |            |
| 1231 FSL C1 487          | CC17 | animal   | Unknown | NT  |      |  | 415 |            |
| 1232 FSL C1 494          | N/D  | animal   | Unknown | II  |      |  |     |            |
| 1233 FSL F2 338          | N/D  | unknown  | Unknown | II  |      |  |     |            |
| 1234 FSL F2 343          | CC23 | unknown  | Unknown | Ia  |      |  | 88  |            |
| 1235 FSL S3 001          | CC1  | unknown  | Unknown | V   |      |  | 1   |            |
| 1236 FSL S3 003          | CC19 | unknown  | Unknown | III |      |  | 19  |            |
| 1237 FSL S3 005          | CC17 | unknown  | Unknown | II  |      |  | 22  |            |
| 1238 FSL S3 014          | CC10 | unknown  | Unknown | Ib  |      |  | 8   |            |
| 1239 FSL S3 023          | CC1  | unknown  | Unknown | V   |      |  | 1   |            |
| 1240 FSL S3 027          | N/D  | animal   | Unknown | II  |      |  |     |            |
| 1241 FSL S3 034          | CC17 | animal   | Unknown | II  |      |  | 61  |            |
| 1242 FSL S3 043          | CC17 | animal   | Unknown | NT  |      |  | 61  |            |
| 1243 FSL S3 062          | N/D  | animal   | Unknown | II  |      |  |     |            |
| 1244 FSL S3 077          | N/D  | animal   | Unknown | II  |      |  |     |            |
| 1245 FSL S3 090          | CC23 | unknown  | Unknown | Ia  |      |  | 23  |            |
| 1246 FSL S3 102          | CC17 | unknown  | Unknown | III |      |  | 31  |            |
| 1247 FSL S3 128          | N/D  | animal   | Unknown | II  |      |  |     |            |
| 1248 FSL S3 137          | CC10 | unknown  | Unknown | Ib  |      |  | 8   |            |
| 1249 FSL S3 170          | N/D  | animal   | Unknown | II  |      |  |     |            |
| 1250 FSL S3 222          | N/D  | animal   | Unknown | II  |      |  |     |            |
| 1251 FSL S3 229          | CC17 | animal   | Unknown | II  |      |  | 415 |            |
| 1252 FSL S3 251          | N/D  | animal   | Unknown | III |      |  |     |            |
| 1253 FSL S3 268          | CC17 | unknown  | Unknown | II  |      |  | 22  |            |
| 1254 FSL S3 337          | CC19 | unknown  | Unknown | III |      |  | 19  |            |
| 1255 FSL S3 442          | CC10 | unknown  | Unknown | NT  |      |  | 12  |            |
| 1256 FSL S3 501          | N/D  | animal   | Unknown | II  |      |  |     |            |
| 1257 FSL S3 568          | CC17 | animal   | Unknown | NT  |      |  | 415 |            |
| 1258 FSL S3 586          | CC17 | animal   | Unknown | II  |      |  | 67  |            |
| 1259 FSL S3 603          | CC17 | animal   | Unknown | III |      |  | 61  |            |
| 1260 FSL S3 608          | CC17 | animal   | Unknown | II  |      |  | 490 |            |

|                   |      |         |         |     |  |     |
|-------------------|------|---------|---------|-----|--|-----|
| 1261 FSL S3 654   | CC17 | animal  | Unknown | II  |  | 61  |
| 1340 LADL 05 108a | N/D  | animal  | Unknown | Ib  |  | 260 |
| 1341 LADL 90 503  | N/D  | animal  | Unknown | NT  |  | 260 |
| 1342 LDS 610      | N/D  | animal  | Unknown | NT  |  |     |
| 1343 LDS 617      | N/D  | animal  | Unknown | NT  |  |     |
| 1344 LDS 623      | CC17 | animal  | Unknown | III |  | 61  |
| 1345 LDS 628      | CC17 | animal  | Unknown | III |  | 61  |
| 1346 LMG 14608    | CC6  | animal  | Unknown | Ia  |  | 7   |
| 1347 LMG 14609    | N/D  | animal  | Unknown | NT  |  |     |
| 1349 LMG 14838    | N/D  | animal  | Unknown | III |  |     |
| 1350 LMG 15081    | CC23 | unknown | Unknown | Ia  |  | 25  |
| 1351 LMG 15083    | CC6  | unknown | Unknown | Ia  |  | 7   |
| 1352 LMG 15084    | CC19 | unknown | Unknown | II  |  | 19  |
| 1353 LMG 15085    | CC17 | unknown | Unknown | III |  | 17  |
| 1354 LMG 15089    | CC19 | unknown | Unknown | III |  | 19  |
| 1355 LMG 15090    | CC10 | unknown | Unknown | Ib  |  | 8   |
| 1356 LMG 15091    | N/D  | unknown | Unknown | IV  |  |     |
| 1357 LMG 15092    | CC1  | unknown | Unknown | II  |  | 2   |
| 1358 LMG 15093    | CC19 | unknown | Unknown | V   |  | 110 |
| 1359 LMG 15094    | CC17 | unknown | Unknown | III |  | 17  |
| 1360 LMG 15095    | CC17 | unknown | Unknown | III |  | 17  |
| 1373 MRI Z1 012   | CC1  | animal  | Unknown | IV  |  | 2   |
| 1374 MRI Z1 022   | CC19 | animal  | Unknown | NT  |  | 121 |
| 1375 MRI Z1 023   | N/D  | animal  | Unknown | Ia  |  | 103 |
| 1376 MRI Z1 024   | CC23 | animal  | Unknown | Ia  |  | 23  |
| 1377 MRI Z1 025   | CC1  | animal  | Unknown | V   |  | 1   |
| 1378 MRI Z1 035   | CC23 | animal  | Unknown | Ia  |  | 88  |
| 1379 MRI Z1 038   | CC10 | animal  | Unknown | NT  |  | 296 |
| 1380 MRI Z1 039   | N/D  | animal  | Unknown | Ia  |  |     |
| 1381 MRI Z1 048   | N/D  | animal  | Unknown | V   |  |     |
| 1382 MRI Z1 049   | N/D  | animal  | Unknown | III |  |     |
| 1383 MRI Z1 198   | CC10 | animal  | Unknown | Ib  |  | 12  |
| 1384 MRI Z1 199   | CC23 | animal  | Unknown | Ia  |  | 23  |
| 1385 MRI Z1 200   | CC23 | animal  | Unknown | Ia  |  | 23  |
| 1386 MRI Z1 201   | CC23 | animal  | Unknown | NT  |  | 23  |
| 1387 MRI Z1 202   | CC23 | animal  | Unknown | Ia  |  | 23  |
| 1388 MRI Z1 203   | CC23 | animal  | Unknown | Ia  |  | 23  |
| 1389 MRI Z1 204   | CC23 | animal  | Unknown | Ia  |  | 23  |
| 1390 MRI Z1 205   | CC1  | animal  | Unknown | V   |  | 1   |
| 1391 MRI Z1 206   | CC10 | animal  | Unknown | NT  |  | 8   |
| 1392 MRI Z1 209   | N/D  | animal  | Unknown | NT  |  |     |
| 1393 MRI Z1 211   | CC1  | animal  | Unknown | NT  |  | 1   |
| 1394 MRI Z1 212   | CC1  | animal  | Unknown | NT  |  | 1   |
| 1395 MRI Z1 214   | CC17 | animal  | Unknown | NT  |  | 591 |
| 1396 MRI Z1 216   | CC17 | animal  | Unknown | NT  |  | 591 |
| 1397 MRI Z1 217   | N/D  | animal  | Unknown | NT  |  |     |
| 1418 SS1014       | CC6  | animal  | Unknown | NT  |  | 6   |
| 1419 SS1218       | N/D  | animal  | Unknown | NT  |  | 261 |
| 1420 SS1219       | N/D  | animal  | Unknown | NT  |  | 260 |
| 1421 STIR CD 01   | CC6  | animal  | Unknown | Ia  |  | 7   |
| 1422 STIR CD 07   | N/D  | animal  | Unknown | Ib  |  |     |
| 1423 STIR CD 09   | N/D  | animal  | Unknown | Ib  |  | 260 |
| 1424 STIR CD 13   | N/D  | animal  | Unknown | Ib  |  |     |
| 1425 STIR CD 14   | CC10 | animal  | Unknown | III |  | 491 |
| 1426 STIR CD 17   | N/D  | animal  | Unknown | Ib  |  |     |
| 1427 STIR CD 21   | CC6  | animal  | Unknown | Ia  |  | 7   |
| 1428 STIR CD 22   | CC6  | animal  | Unknown | Ia  |  | 7   |
| 1429 STIR CD 23   | CC6  | animal  | Unknown | Ia  |  | 7   |
| 1430 STIR CD 24   | CC6  | animal  | Unknown | Ia  |  | 7   |
| 1431 STIR CD 25   | CC10 | animal  | Unknown | III |  | 283 |
| 1432 STIR CD 26   | CC6  | animal  | Unknown | Ia  |  | 500 |
| 1433 STIR CD 27   | CC6  | animal  | Unknown | Ia  |  | 7   |

|                 |      |         |             |     |      |     |
|-----------------|------|---------|-------------|-----|------|-----|
| 1434 STIR CD 28 | CC6  | animal  | Unknown     | la  |      | 500 |
| 1435 STIR CD 29 | N/D  | animal  | Unknown     | lb  |      | 261 |
| 1445 ZQ0910     | CC6  | animal  | Unknown     | la  |      | 7   |
| 1446 FSL S3 105 | N/D  | animal  | Unknown     | III |      |     |
| 1447 FSL S3 277 | N/D  | animal  | Unknown     | III |      |     |
| 1455 MRI Z1 219 | CC10 | animal  | Unknown     | II  |      | 590 |
| 1456 ENC06      | N/D  | animal  | Unknown     | la  |      |     |
| 1457 FNA07      | CC6  | animal  | Unknown     | la  |      | 7   |
| 1458 FPrA02     | CC6  | animal  | Unknown     | la  |      | 7   |
| 184 SA20 06     | N/D  | animal  | Brazil      | lb  | 2006 | 553 |
| 709 MRI Z1 213  | CC17 | animal  | Italy       | NT  | 2004 | 591 |
| 710 MRI Z1 215  | CC1  | animal  | Italy       | IV  | 2004 | 589 |
| 711 MRI Z1 218  | CC10 | animal  | Italy       | II  | 2005 | 590 |
| 745 ILRI112     | N/D  | animal  | Kenya       | NT  |      |     |
| 763 ILRI005     | N/D  | animal  | Unknown     | NT  | 2004 | 609 |
| ERR1624734      | CC19 | unknown | Netherlands | III |      | 19  |
| ERR1624739      | CC23 | unknown | Netherlands | la  |      | 23  |
| ERR1624740      | CC17 | unknown | Netherlands | III |      | 17  |
| ERR1624750      | CC19 | unknown | Netherlands | III |      | 19  |
| ERR1624754      | CC19 | unknown | Netherlands | II  |      | 19  |
| ERR1624766      | CC17 | unknown | Netherlands | III |      | 17  |
| ERR1624768      | CC19 | unknown | Netherlands | III |      | 19  |
| ERR1624770      | CC17 | unknown | Netherlands | III |      | 17  |
| ERR1624773      | CC6  | unknown | Netherlands | la  |      | 7   |
| ERR1624786      | CC19 | unknown | Netherlands | III |      | 19  |
| ERR1624791      | CC19 | unknown | Netherlands | III |      | 19  |
| ERR1624792      | CC19 | unknown | Netherlands | III |      | 19  |
| ERR1624793      | CC10 | unknown | Netherlands | lb  |      | 12  |
| ERR1624794      | CC19 | unknown | Netherlands | III |      | 19  |
| ERR1624797      | CC19 | unknown | Netherlands | III |      | 19  |
| ERR1624801      | CC10 | unknown | Netherlands | lb  |      | 10  |
| ERR1624802      | CC17 | unknown | Netherlands | III |      | 17  |
| ERR1624807      | CC17 | unknown | Netherlands | III |      | 17  |
| ERR1624811      | CC10 | unknown | Netherlands | lb  |      | 12  |
| ERR1624823      | CC6  | unknown | Netherlands | la  |      | 7   |
| ERR1624827      | CC19 | unknown | Netherlands | III |      | 19  |
| ERR1624830      | CC6  | unknown | Netherlands | la  |      | 7   |
| ERR1624831      | CC23 | unknown | Netherlands | la  |      | 23  |
| ERR1624832      | CC10 | unknown | Netherlands | lb  |      | 12  |
| ERR1624836      | CC6  | unknown | Netherlands | la  |      | 7   |
| ERR1624848      | CC23 | unknown | Netherlands | la  |      | 23  |
| ERR1624853      | CC10 | unknown | Netherlands | lb  |      | 9   |
| ERR1624867      | CC19 | unknown | Netherlands | III |      | 19  |
| ERR1624868      | CC19 | unknown | Netherlands | III |      | 19  |
| ERR1624871      | CC17 | unknown | Netherlands | III |      | 17  |
| ERR1624884      | N/D  | unknown | Netherlands | III |      |     |
| ERR1624887      | CC19 | unknown | Netherlands | III |      | 19  |
| ERR1624889      | CC19 | unknown | Netherlands | III |      | 19  |
| ERR1624894      | CC19 | unknown | Netherlands | III |      | 19  |
| ERR1624901      | CC17 | unknown | Netherlands | III |      | 17  |
| ERR1624904      | CC19 | unknown | Netherlands | III |      | 19  |
| ERR1624918      | CC17 | unknown | Netherlands | III |      | 17  |
| ERR1624920      | CC10 | unknown | Netherlands | lb  |      | 12  |
| ERR1624922      | CC23 | unknown | Netherlands | III |      | 23  |
| ERR1624924      | CC17 | unknown | Netherlands | III |      | 17  |
| ERR1624927      | CC17 | unknown | Netherlands | III |      | 17  |
| ERR1624928      | CC23 | unknown | Netherlands | la  |      | 23  |
| ERR1624930      | CC19 | unknown | Netherlands | II  |      | 28  |
| ERR1624939      | CC17 | unknown | Netherlands | III |      | 17  |
| ERR1624947      | CC19 | unknown | Netherlands | III |      | 19  |
| ERR1624952      | N/D  | unknown | Netherlands | la  |      |     |
| ERR1624955      | N/D  | unknown | Netherlands | la  |      |     |

|            |      |         |             |     |  |     |
|------------|------|---------|-------------|-----|--|-----|
| ERR1624958 | CC17 | unknown | Netherlands | III |  | 17  |
| ERR1624959 | CC17 | unknown | Netherlands | III |  | 17  |
| ERR1624964 | CC10 | unknown | Netherlands | Ib  |  | 8   |
| ERR1624970 | CC23 | unknown | Netherlands | Ia  |  | 23  |
| ERR1624972 | CC10 | unknown | Netherlands | Ib  |  | 12  |
| ERR1624973 | CC17 | unknown | Netherlands | III |  | 17  |
| ERR1624979 | CC17 | unknown | Netherlands | III |  | 17  |
| ERR1624980 | CC19 | unknown | Netherlands | III |  | 19  |
| ERR1624986 | CC19 | unknown | Netherlands | III |  | 547 |
| ERR1624987 | CC10 | unknown | Netherlands | Ib  |  | 9   |
| ERR1624996 | CC19 | unknown | Netherlands | III |  | 19  |
| ERR1624998 | CC23 | unknown | Netherlands | Ia  |  | 23  |
| ERR1625003 | CC23 | unknown | Netherlands | Ia  |  | 23  |
| ERR1625005 | CC10 | unknown | Netherlands | Ib  |  | 10  |
| ERR1625010 | CC17 | unknown | Netherlands | III |  | 17  |
| ERR1625015 | CC17 | unknown | Netherlands | III |  | 17  |
| ERR1625019 | CC23 | unknown | Netherlands | Ia  |  | 23  |
| ERR1625020 | CC6  | unknown | Netherlands | Ib  |  | 6   |
| ERR1625024 | CC19 | unknown | Netherlands | III |  | 19  |
| ERR1625026 | CC19 | unknown | Netherlands | III |  | 182 |
| ERR1625028 | CC17 | unknown | Netherlands | III |  | 17  |
| ERR1625035 | CC10 | unknown | Netherlands | Ib  |  | 12  |
| ERR1625036 | CC23 | unknown | Netherlands | Ia  |  | 24  |
| ERR1625037 | CC10 | unknown | Netherlands | Ib  |  | 12  |
| ERR1625038 | CC19 | unknown | Netherlands | III |  | 19  |
| ERR1625042 | CC1  | unknown | Netherlands | II  |  | 1   |
| ERR1625049 | CC17 | unknown | Netherlands | III |  | 17  |
| ERR1625053 | CC17 | unknown | Netherlands | III |  | 148 |
| ERR1625055 | CC17 | unknown | Netherlands | III |  | 17  |
| ERR1625061 | CC10 | unknown | Netherlands | Ib  |  | 12  |
| ERR1625072 | CC17 | unknown | Netherlands | III |  | 17  |
| ERR1625076 | N/D  | unknown | Netherlands | V   |  | 26  |
| ERR1625087 | CC19 | unknown | Netherlands | III |  | 19  |
| ERR1625094 | CC10 | unknown | Netherlands | Ib  |  | 8   |
| ERR1625096 | CC17 | unknown | Netherlands | III |  | 17  |
| ERR1625099 | CC17 | unknown | Netherlands | III |  | 17  |
| ERR1625105 | CC17 | unknown | Netherlands | III |  | 17  |
| ERR1625108 | CC10 | unknown | Netherlands | Ib  |  | 8   |
| ERR1625117 | CC19 | unknown | Netherlands | III |  | 19  |
| ERR1625125 | CC17 | unknown | Netherlands | III |  | 17  |
| ERR1625127 | CC19 | unknown | Netherlands | III |  | 19  |
| ERR1625129 | CC23 | unknown | Netherlands | Ia  |  | 23  |
| ERR1625131 | CC19 | unknown | Netherlands | III |  | 19  |
| ERR1625140 | CC23 | unknown | Netherlands | Ia  |  | 23  |
| ERR1625144 | CC1  | unknown | Netherlands | V   |  | 1   |
| ERR1625146 | CC10 | unknown | Netherlands | Ib  |  | 10  |
| ERR1625174 | CC23 | unknown | Netherlands | Ia  |  | 23  |
| ERR1625175 | N/D  | unknown | Netherlands | Ia  |  |     |
| ERR1625181 | CC10 | unknown | Netherlands | Ib  |  | 10  |
| ERR1625186 | CC19 | unknown | Netherlands | III |  | 19  |
| ERR1625192 | CC19 | unknown | Netherlands | III |  | 19  |
| ERR1625194 | CC23 | unknown | Netherlands | Ia  |  | 23  |
| ERR1625195 | CC17 | unknown | Netherlands | III |  | 17  |
| ERR1625202 | CC10 | unknown | Netherlands | Ib  |  | 12  |
| ERR1625211 | CC19 | unknown | Netherlands | III |  | 19  |
| ERR1625216 | CC23 | unknown | Netherlands | Ia  |  | 23  |
| ERR1625221 | CC23 | unknown | Netherlands | III |  | 23  |
| ERR1625223 | CC17 | unknown | Netherlands | III |  | 17  |
| ERR1625226 | N/D  | unknown | Netherlands | III |  |     |
| ERR1625229 | CC17 | unknown | Netherlands | III |  | 17  |
| ERR1625231 | CC23 | unknown | Netherlands | Ia  |  | 23  |
| ERR1625233 | CC17 | unknown | Netherlands | III |  | 17  |

|            |      |         |             |     |  |     |
|------------|------|---------|-------------|-----|--|-----|
| ERR1625234 | CC23 | unknown | Netherlands | la  |  | 23  |
| ERR1625235 | CC23 | unknown | Netherlands | la  |  | 23  |
| ERR1625237 | N/D  | unknown | Netherlands | III |  |     |
| ERR1625240 | CC19 | unknown | Netherlands | III |  | 19  |
| ERR1625243 | CC17 | unknown | Netherlands | III |  | 17  |
| ERR1625257 | CC17 | unknown | Netherlands | III |  | 17  |
| ERR1625260 | CC17 | unknown | Netherlands | III |  | 17  |
| ERR1625269 | CC23 | unknown | Netherlands | la  |  | 24  |
| ERR1625271 | CC19 | unknown | Netherlands | III |  | 19  |
| ERR1625278 | CC17 | unknown | Netherlands | III |  | 17  |
| ERR1625282 | CC1  | unknown | Netherlands | IV  |  | 459 |
| ERR1625283 | CC17 | unknown | Netherlands | III |  | 17  |
| ERR1625284 | CC17 | unknown | Netherlands | III |  | 17  |
| ERR1625285 | CC10 | unknown | Netherlands | lb  |  | 12  |
| ERR1625287 | CC19 | unknown | Netherlands | III |  | 328 |
| ERR1625288 | CC17 | unknown | Netherlands | III |  | 17  |
| ERR1625290 | CC17 | unknown | Netherlands | III |  | 17  |
| ERR1625291 | CC17 | unknown | Netherlands | III |  | 17  |
| ERR1625294 | CC17 | unknown | Netherlands | III |  | 17  |
| ERR1625297 | CC17 | unknown | Netherlands | III |  | 148 |
| ERR1625301 | CC19 | unknown | Netherlands | III |  | 19  |
| ERR1625302 | CC1  | unknown | Netherlands | V   |  | 1   |
| ERR1625307 | CC17 | unknown | Netherlands | III |  | 17  |
| ERR1625313 | CC19 | unknown | Netherlands | III |  | 19  |
| ERR1625331 | CC17 | unknown | Netherlands | III |  | 17  |
| ERR1625332 | CC19 | unknown | Netherlands | III |  | 19  |
| ERR1625333 | CC10 | unknown | Netherlands | lb  |  | 8   |
| ERR1625339 | CC1  | unknown | Netherlands | V   |  | 1   |
| ERR1625352 | CC19 | unknown | Netherlands | III |  | 19  |
| ERR1625357 | CC1  | unknown | Netherlands | V   |  | 1   |
| ERR1625361 | CC23 | unknown | Netherlands | la  |  | 23  |
| ERR1625372 | CC17 | unknown | Netherlands | III |  | 17  |
| ERR1625376 | CC19 | unknown | Netherlands | III |  | 19  |
| ERR1625393 | CC17 | unknown | Netherlands | III |  | 17  |
| ERR1625395 | N/D  | unknown | Netherlands | II  |  |     |
| ERR1625397 | CC17 | unknown | Netherlands | III |  | 17  |
| ERR1625402 | CC17 | unknown | Netherlands | III |  | 17  |
| ERR1625406 | CC10 | unknown | Netherlands | lb  |  | 10  |
| ERR1625408 | N/D  | unknown | Netherlands | III |  |     |
| ERR1625414 | CC19 | unknown | Netherlands | II  |  | 19  |
| ERR1625451 | CC6  | unknown | Netherlands | V   |  | 7   |
| ERR1625455 | CC17 | unknown | Netherlands | III |  | 17  |
| ERR1625456 | CC23 | unknown | Netherlands | la  |  | 23  |
| ERR1625464 | CC17 | unknown | Netherlands | III |  | 17  |
| ERR1625483 | CC23 | unknown | Netherlands | la  |  | 23  |
| ERR1659687 | CC17 | unknown | Netherlands | III |  | 17  |
| ERR1659690 | CC17 | unknown | Netherlands | III |  | 17  |
| ERR1659693 | CC23 | unknown | Netherlands | la  |  | 23  |
| ERR1659694 | CC17 | unknown | Netherlands | III |  | 17  |
| ERR1659702 | CC10 | unknown | Netherlands | lb  |  | 12  |
| ERR1659704 | CC23 | unknown | Netherlands | la  |  | 144 |
| ERR1659707 | CC23 | unknown | Netherlands | V   |  | 23  |
| ERR1659712 | CC17 | unknown | Netherlands | III |  | 17  |
| ERR1659715 | CC19 | unknown | Netherlands | III |  | 19  |
| ERR1659730 | CC23 | unknown | Netherlands | la  |  | 23  |
| ERR1659735 | CC10 | unknown | Netherlands | lb  |  | 8   |
| ERR1659738 | CC17 | unknown | Netherlands | III |  | 17  |
| ERR1659739 | CC17 | unknown | Netherlands | III |  | 17  |
| ERR1659740 | N/D  | unknown | Netherlands | III |  |     |
| ERR1659743 | CC17 | unknown | Netherlands | III |  | 17  |
| ERR1659749 | N/D  | unknown | Netherlands | III |  |     |
| ERR1659754 | CC1  | unknown | Netherlands | lb  |  | 1   |

|            |      |         |             |     |  |     |
|------------|------|---------|-------------|-----|--|-----|
| ERR1659761 | CC17 | unknown | Netherlands | III |  | 17  |
| ERR1659775 | CC17 | unknown | Netherlands | III |  | 17  |
| ERR1659798 | CC17 | unknown | Netherlands | III |  | 17  |
| ERR1659813 | CC17 | unknown | Netherlands | III |  | 17  |
| ERR1659816 | CC6  | unknown | Netherlands | V   |  | 7   |
| ERR1659819 | CC23 | unknown | Netherlands | Ia  |  | 23  |
| ERR1659823 | CC17 | unknown | Netherlands | III |  | 17  |
| ERR1659825 | CC23 | unknown | Netherlands | Ia  |  | 23  |
| ERR1659830 | CC19 | unknown | Netherlands | III |  | 19  |
| ERR1659834 | N/D  | unknown | Netherlands | V   |  |     |
| ERR1659841 | CC19 | unknown | Netherlands | II  |  | 28  |
| ERR1659847 | N/D  | unknown | Netherlands | Ia  |  | 103 |
| ERR1659851 | CC23 | unknown | Netherlands | Ia  |  | 24  |
| ERR1659867 | CC17 | unknown | Netherlands | III |  | 17  |
| ERR1672384 | N/D  | unknown | Netherlands | III |  |     |
| ERR1672386 | CC10 | unknown | Netherlands | Ib  |  | 12  |
| ERR1672388 | CC17 | unknown | Netherlands | III |  | 17  |
| ERR1672395 | N/D  | unknown | Netherlands | III |  |     |
| ERR1672396 | CC17 | unknown | Netherlands | III |  | 17  |
| ERR1672400 | CC19 | unknown | Netherlands | III |  | 19  |
| ERR1672407 | CC10 | unknown | Netherlands | Ib  |  | 10  |
| ERR1672411 | CC23 | unknown | Netherlands | Ia  |  | 23  |
| ERR1672414 | CC1  | unknown | Netherlands | V   |  | 1   |
| ERR1672417 | CC19 | unknown | Netherlands | III |  | 19  |
| ERR1672424 | N/D  | unknown | Netherlands | III |  |     |
| ERR1672425 | CC17 | unknown | Netherlands | III |  | 17  |
| ERR1672426 | CC17 | unknown | Netherlands | III |  | 17  |
| ERR1672430 | CC17 | unknown | Netherlands | III |  | 17  |
| ERR1672431 | CC19 | unknown | Netherlands | III |  | 19  |
| ERR1672432 | CC17 | unknown | Netherlands | III |  | 17  |
| ERR1672433 | CC17 | unknown | Netherlands | III |  | 17  |
| ERR1672447 | CC23 | unknown | Netherlands | Ia  |  | 24  |
| ERR1672450 | CC23 | unknown | Netherlands | Ia  |  | 23  |
| ERR1672452 | N/D  | unknown | Netherlands | III |  |     |
| ERR1672455 | CC23 | unknown | Netherlands | Ia  |  | 23  |
| ERR1672456 | CC23 | unknown | Netherlands | Ia  |  | 24  |
| ERR1672459 | N/D  | unknown | Netherlands | Ia  |  |     |
| ERR1672464 | CC6  | unknown | Netherlands | III |  | 7   |
| ERR1672472 | CC17 | unknown | Netherlands | III |  | 17  |
| ERR1672473 | CC17 | unknown | Netherlands | III |  | 17  |
| ERR1672479 | CC17 | unknown | Netherlands | III |  | 17  |
| ERR1672481 | CC1  | unknown | Netherlands | IV  |  | 2   |
| ERR1672487 | CC17 | unknown | Netherlands | III |  | 17  |
| ERR1672501 | CC23 | unknown | Netherlands | Ia  |  | 23  |
| ERR1672503 | CC19 | unknown | Netherlands | III |  | 19  |
| ERR1672504 | CC23 | unknown | Netherlands | Ia  |  | 23  |
| ERR1672509 | CC17 | unknown | Netherlands | III |  | 17  |
| ERR1672511 | CC19 | unknown | Netherlands | III |  | 19  |
| ERR1672512 | CC19 | unknown | Netherlands | II  |  | 19  |
| ERR1672526 | CC17 | unknown | Netherlands | III |  | 17  |
| ERR1672528 | CC17 | unknown | Netherlands | III |  | 17  |
| ERR1672529 | CC19 | unknown | Netherlands | III |  | 19  |
| ERR1672530 | CC19 | unknown | Netherlands | III |  | 19  |
| ERR1672545 | CC17 | unknown | Netherlands | III |  | 17  |
| ERR1672557 | CC17 | unknown | Netherlands | III |  | 17  |
| ERR1672561 | CC19 | unknown | Netherlands | III |  | 19  |
| ERR1672563 | CC17 | unknown | Netherlands | III |  | 17  |
| ERR1672564 | CC17 | unknown | Netherlands | III |  | 17  |
| ERR1672574 | CC17 | unknown | Netherlands | III |  | 17  |
| ERR1672578 | CC17 | unknown | Netherlands | III |  | 17  |
| ERR1672583 | CC10 | unknown | Netherlands | Ib  |  | 8   |
| ERR1672586 | N/D  | unknown | Netherlands | III |  |     |

|            |      |         |             |     |  |     |
|------------|------|---------|-------------|-----|--|-----|
| ERR1672600 | CC17 | unknown | Netherlands | III |  | 17  |
| ERR1672601 | CC19 | unknown | Netherlands | III |  | 19  |
| ERR1672607 | CC19 | unknown | Netherlands | III |  | 19  |
| ERR1672613 | CC10 | unknown | Netherlands | Ib  |  | 12  |
| ERR1672621 | CC23 | unknown | Netherlands | Ia  |  | 23  |
| ERR1672623 | CC19 | unknown | Netherlands | III |  | 233 |
| ERR1672628 | CC23 | unknown | Netherlands | Ia  |  | 144 |
| ERR1672631 | CC6  | unknown | Netherlands | Ia  |  | 7   |
| ERR1672633 | CC17 | unknown | Netherlands | III |  | 17  |
| ERR1672635 | CC23 | unknown | Netherlands | Ia  |  | 23  |
| ERR1672636 | CC19 | unknown | Netherlands | V   |  | 19  |
| ERR1672654 | CC10 | unknown | Netherlands | Ib  |  | 12  |
| ERR1672660 | CC17 | unknown | Netherlands | III |  | 17  |
| ERR1672663 | CC17 | unknown | Netherlands | IV  |  | 291 |
| ERR1672671 | CC23 | unknown | Netherlands | Ia  |  | 23  |
| ERR1672672 | CC17 | unknown | Netherlands | III |  | 17  |
| ERR1672692 | N/D  | unknown | Netherlands | Ia  |  |     |
| ERR1672694 | CC17 | unknown | Netherlands | III |  | 17  |
| ERR1672708 | CC17 | unknown | Netherlands | III |  | 17  |
| ERR1672711 | CC1  | unknown | Netherlands | V   |  | 1   |
| ERR1672712 | CC19 | unknown | Netherlands | III |  | 19  |
| ERR1672718 | CC17 | unknown | Netherlands | III |  | 148 |
| ERR1672725 | CC17 | unknown | Netherlands | III |  | 17  |
| ERR1672728 | CC19 | unknown | Netherlands | V   |  | 110 |
| ERR1672735 | CC23 | unknown | Netherlands | Ia  |  | 23  |
| ERR1672739 | CC17 | unknown | Netherlands | III |  | 17  |
| ERR1672748 | CC17 | unknown | Netherlands | III |  | 17  |
| ERR1672751 | CC17 | unknown | Netherlands | III |  | 17  |
| ERR1672753 | CC17 | unknown | Netherlands | III |  | 17  |
| ERR1672758 | CC17 | unknown | Netherlands | III |  | 17  |
| ERR1672771 | CC23 | unknown | Netherlands | Ia  |  | 24  |
| ERR1672777 | CC17 | unknown | Netherlands | III |  | 17  |
| ERR1672782 | CC17 | unknown | Netherlands | III |  | 17  |
| ERR1672784 | CC23 | unknown | Netherlands | Ia  |  | 144 |
| ERR1672794 | CC17 | unknown | Netherlands | III |  | 17  |
| ERR1672797 | CC17 | unknown | Netherlands | III |  | 17  |
| ERR1672798 | CC23 | unknown | Netherlands | Ia  |  | 23  |
| ERR1672801 | N/D  | unknown | Netherlands | III |  |     |
| ERR1672803 | CC23 | unknown | Netherlands | Ia  |  | 23  |
| ERR1672808 | CC17 | unknown | Netherlands | III |  | 17  |
| ERR1672812 | CC23 | unknown | Netherlands | Ia  |  | 24  |
| ERR1672821 | CC17 | unknown | Netherlands | III |  | 17  |
| ERR1672834 | CC17 | unknown | Netherlands | III |  | 17  |
| ERR1672836 | CC23 | unknown | Netherlands | Ia  |  | 144 |
| ERR1672839 | CC19 | unknown | Netherlands | V   |  | 110 |
| ERR1672840 | CC17 | unknown | Netherlands | III |  | 17  |
| ERR1672842 | CC23 | unknown | Netherlands | Ia  |  | 23  |
| ERR1672843 | CC19 | unknown | Netherlands | II  |  | 28  |
| ERR1672847 | N/D  | unknown | Netherlands | III |  |     |
| ERR1672849 | CC23 | unknown | Netherlands | Ia  |  | 23  |
| ERR1672850 | CC23 | unknown | Netherlands | Ia  |  | 23  |
| ERR1672851 | CC23 | unknown | Netherlands | Ia  |  | 23  |
| ERR1672854 | N/D  | unknown | Netherlands | III |  |     |
| ERR1672856 | N/D  | unknown | Netherlands | III |  |     |
| ERR1672860 | CC23 | unknown | Netherlands | Ia  |  | 23  |
| ERR1672861 | CC17 | unknown | Netherlands | III |  | 17  |
| ERR1672873 | CC23 | unknown | Netherlands | Ia  |  | 23  |
| ERR1672874 | CC17 | unknown | Netherlands | III |  | 17  |
| ERR1672882 | CC17 | unknown | Netherlands | III |  | 17  |
| ERR1672883 | CC17 | unknown | Netherlands | III |  | 17  |
| ERR1672889 | CC1  | unknown | Netherlands | V   |  | 1   |
| ERR1672893 | CC17 | unknown | Netherlands | III |  | 17  |



|            |      |         |             |     |  |    |
|------------|------|---------|-------------|-----|--|----|
| ERR1672907 | CC17 | unknown | Netherlands | III |  | 17 |
| ERR1672915 | CC23 | unknown | Netherlands | Ia  |  | 23 |
| ERR1672924 | CC17 | unknown | Netherlands | III |  | 17 |
| ERR1672927 | CC17 | unknown | Netherlands | III |  | 17 |
| ERR1672933 | CC17 | unknown | Netherlands | III |  | 17 |
