# Supplementary material for: Pan-GWAS of Streptococcus agalactiae Highlights Lineage-Specific Genes Associated with Virulence and Niche Adaptation
Source: PubMed Central journal article supplement (PMC7373188; doi:10.1128/mbio.00728-20), 2020-06-09
Supplement: mBio.00728-20-st002.pdf [file mBio.00728-20-st002.pdf]

TableS2

| CC   | ST  | Brazil | Canada | Germany | Italy | Kenya | Malawi | Netherlands | USA | Unknown |
|------|-----|--------|--------|---------|-------|-------|--------|-------------|-----|---------|
| CC1  | 1   | 0      | 69     | 0       | 0     | 87    | 1      | 9           | 95  | 6       |
|      | 14  | 0      | 0      | 0       | 0     | 1     | 0      | 0           | 0   | 0       |
|      | 153 | 0      | 0      | 0       | 0     | 0     | 0      | 0           | 1   | 0       |
|      | 167 | 0      | 0      | 0       | 0     | 1     | 0      | 0           | 0   | 0       |
|      | 196 | 0      | 0      | 0       | 0     | 17    | 0      | 0           | 0   | 0       |
|      | 2   | 0      | 1      | 0       | 0     | 7     | 0      | 1           | 0   | 2       |
|      | 297 | 0      | 0      | 0       | 0     | 0     | 0      | 0           | 1   | 0       |
|      | 453 | 0      | 1      | 0       | 0     | 0     | 0      | 0           | 0   | 0       |
|      | 459 | 0      | 0      | 0       | 0     | 0     | 0      | 1           | 0   | 0       |
|      | 531 | 0      | 1      | 0       | 0     | 0     | 0      | 0           | 0   | 0       |
|      | 589 | 0      | 0      | 0       | 1     | 0     | 0      | 0           | 0   | 0       |
|      | 794 | 0      | 0      | 0       | 0     | 1     | 0      | 0           | 0   | 0       |
|      | 796 | 0      | 0      | 0       | 0     | 9     | 0      | 0           | 0   | 0       |
|      | 799 | 0      | 0      | 0       | 0     | 2     | 0      | 0           | 0   | 0       |
|      | 871 | 0      | 1      | 0       | 0     | 0     | 0      | 0           | 0   | 0       |
|      | 872 | 0      | 0      | 0       | 0     | 0     | 0      | 0           | 1   | 0       |
| 873  | 0   | 0      | 0      | 0       | 0     | 0     | 0      | 0           | 1   |         |
| CC6  | 500 | 0      | 0      | 0       | 0     | 0     | 0      | 0           | 0   | 2       |
|      | 6   | 0      | 0      | 0       | 0     | 0     | 0      | 1           | 0   | 1       |
|      | 7   | 0      | 0      | 0       | 0     | 0     | 0      | 8           | 0   | 13      |
| CC10 | 10  | 0      | 0      | 0       | 0     | 92    | 6      | 6           | 0   | 0       |
|      | 12  | 0      | 0      | 0       | 0     | 2     | 0      | 14          | 0   | 2       |
|      | 283 | 0      | 0      | 0       | 0     | 0     | 0      | 0           | 0   | 1       |
|      | 296 | 0      | 0      | 0       | 0     | 0     | 0      | 0           | 0   | 1       |
|      | 491 | 0      | 0      | 0       | 0     | 0     | 0      | 0           | 0   | 1       |
|      | 590 | 0      | 0      | 0       | 1     | 0     | 0      | 0           | 0   | 1       |
|      | 787 | 0      | 0      | 0       | 0     | 1     | 0      | 0           | 0   | 0       |
|      | 797 | 0      | 0      | 0       | 0     | 1     | 0      | 0           | 0   | 0       |
|      | 8   | 0      | 0      | 0       | 0     | 61    | 6      | 6           | 0   | 4       |
|      | 804 | 0      | 0      | 0       | 0     | 1     | 0      | 0           | 0   | 0       |
| 9    | 0   | 0      | 0      | 0       | 0     | 0     | 2      | 0           | 0   |         |
| CC19 | 110 | 0      | 0      | 0       | 0     | 0     | 0      | 2           | 0   | 1       |
|      | 121 | 0      | 0      | 0       | 0     | 0     | 0      | 0           | 0   | 1       |
|      | 182 | 0      | 0      | 0       | 0     | 72    | 7      | 1           | 0   | 0       |
|      | 19  | 0      | 0      | 0       | 0     | 29    | 6      | 51          | 0   | 4       |
|      | 233 | 0      | 0      | 0       | 0     | 0     | 0      | 1           | 0   | 0       |
|      | 28  | 0      | 0      | 0       | 0     | 40    | 2      | 3           | 0   | 0       |
|      | 327 | 0      | 0      | 0       | 0     | 27    | 27     | 0           | 0   | 0       |
|      | 328 | 0      | 0      | 0       | 0     | 9     | 0      | 1           | 0   | 0       |
|      | 547 | 0      | 0      | 0       | 0     | 0     | 0      | 1           | 0   | 0       |
| 793  | 0   | 0      | 0      | 0       | 2     | 0     | 0      | 0           | 0   |         |
| CC17 | 109 | 0      | 0      | 0       | 0     | 1     | 4      | 0           | 0   | 0       |
|      | 147 | 0      | 0      | 0       | 0     | 1     | 0      | 0           | 0   | 0       |
|      | 148 | 0      | 2      | 0       | 0     | 0     | 0      | 3           | 0   | 0       |
|      | 17  | 0      | 60     | 0       | 0     | 233   | 134    | 109         | 0   | 3       |
|      | 22  | 0      | 0      | 0       | 0     | 0     | 0      | 0           | 0   | 2       |
|      | 290 | 0      | 1      | 0       | 0     | 0     | 0      | 0           | 0   | 0       |
|      | 291 | 0      | 0      | 0       | 0     | 2     | 0      | 1           | 0   | 0       |
|      | 31  | 0      | 0      | 0       | 0     | 0     | 0      | 0           | 0   | 1       |
|      | 415 | 0      | 0      | 0       | 0     | 0     | 0      | 0           | 0   | 3       |
|      | 484 | 0      | 1      | 0       | 0     | 78    | 0      | 0           | 0   | 0       |
|      | 490 | 0      | 0      | 0       | 0     | 0     | 0      | 0           | 0   | 1       |
|      | 591 | 0      | 0      | 0       | 1     | 0     | 0      | 0           | 0   | 2       |
|      | 61  | 0      | 0      | 0       | 0     | 0     | 0      | 0           | 0   | 6       |
|      | 67  | 0      | 0      | 0       | 0     | 0     | 0      | 0           | 0   | 2       |
|      | 784 | 0      | 0      | 0       | 0     | 1     | 0      | 0           | 0   | 0       |
|      | 786 | 0      | 0      | 0       | 0     | 1     | 0      | 0           | 0   | 0       |
|      | 788 | 0      | 0      | 0       | 0     | 2     | 0      | 0           | 0   | 0       |
|      | 790 | 0      | 0      | 0       | 0     | 2     | 0      | 0           | 0   | 0       |
|      | 792 | 0      | 0      | 0       | 0     | 2     | 0      | 0           | 0   | 0       |
|      | 795 | 0      | 0      | 0       | 0     | 1     | 0      | 0           | 0   | 0       |
|      | 800 | 0      | 0      | 0       | 0     | 1     | 0      | 0           | 0   | 0       |
|      | 801 | 0      | 0      | 0       | 0     | 6     | 0      | 0           | 0   | 0       |
|      | 866 | 0      | 0      | 0       | 0     | 0     | 8      | 0           | 0   | 0       |
| 867  | 0   | 0      | 0      | 0       | 0     | 1     | 0      | 0           | 0   |         |
| 868  | 0   | 0      | 0      | 0       | 0     | 1     | 0      | 0           | 0   |         |
| 869  | 0   | 0      | 0      | 0       | 0     | 1     | 0      | 0           | 0   |         |
| 870  | 0   | 0      | 0      | 0       | 0     | 1     | 0      | 0           | 0   |         |
| 874  | 0   | 1      | 0      | 0       | 0     | 0     | 0      | 0           | 0   |         |
| 95   | 0   | 1      | 0      | 0       | 0     | 0     | 0      | 0           | 0   |         |
|      | 144 | 0      | 0      | 0       | 0     | 1     | 0      | 4           | 0   | 0       |
|      | 223 | 0      | 0      | 0       | 0     | 2     | 18     | 0           | 0   | 0       |

TableS2

|        |     |   |   |   |   |     |    |    |   |    |
|--------|-----|---|---|---|---|-----|----|----|---|----|
| CC23   | 23  | 0 | 0 | 1 | 0 | 209 | 60 | 44 | 0 | 8  |
|        | 24  | 0 | 0 | 0 | 0 | 7   | 7  | 7  | 0 | 0  |
|        | 25  | 0 | 0 | 0 | 0 | 0   | 0  | 0  | 0 | 1  |
|        | 498 | 0 | 0 | 0 | 0 | 4   | 0  | 0  | 0 | 0  |
|        | 55  | 0 | 0 | 0 | 0 | 1   | 0  | 0  | 0 | 0  |
|        | 802 | 0 | 0 | 0 | 0 | 2   | 2  | 0  | 0 | 0  |
|        | 88  | 0 | 0 | 0 | 0 | 0   | 0  | 0  | 0 | 2  |
| Single | 103 | 0 | 0 | 0 | 0 | 1   | 0  | 1  | 0 | 1  |
|        | 26  | 0 | 0 | 0 | 0 | 0   | 0  | 1  | 0 | 0  |
|        | 260 | 0 | 0 | 0 | 0 | 0   | 0  | 0  | 0 | 4  |
|        | 261 | 0 | 0 | 0 | 0 | 0   | 0  | 0  | 0 | 2  |
|        | 3   | 0 | 0 | 0 | 0 | 2   | 0  | 0  | 0 | 0  |
|        | 486 | 0 | 0 | 0 | 0 | 2   | 0  | 0  | 0 | 0  |
|        | 553 | 1 | 0 | 0 | 0 | 0   | 0  | 0  | 0 | 0  |
|        | 609 | 0 | 0 | 0 | 0 | 0   | 0  | 0  | 0 | 1  |
|        | 785 | 0 | 0 | 0 | 0 | 1   | 0  | 0  | 0 | 0  |
|        | 791 | 0 | 0 | 0 | 0 | 1   | 0  | 0  | 0 | 0  |
|        | 798 | 0 | 0 | 0 | 0 | 1   | 0  | 0  | 0 | 0  |
| 803    | 0   | 0 | 0 | 0 | 1 | 0   | 0  | 0  | 0 |    |
|        | N/D | 0 | 2 | 0 | 0 | 7   | 11 | 22 | 0 | 26 |
