# Supplementary material for: Pan-GWAS of Streptococcus agalactiae Highlights Lineage-Specific Genes Associated with Virulence and Niche Adaptation
Source: PubMed Central journal article supplement (PMC7373188; doi:10.1128/mbio.00728-20), 2020-06-09
Supplement: mBio.00728-20-st003.pdf [file mBio.00728-20-st003.pdf]

| CC1  | Gene name        | Length (AA) | KEGG #  | Annotation (Kegg GO and prokka)                                                                                                                  | Class        | Type of variation          |
|------|------------------|-------------|---------|--------------------------------------------------------------------------------------------------------------------------------------------------|--------------|----------------------------|
|      | <i>manB</i>      | 145         | K02744  | PTS-Aga-EIIA; PTS system, N-acetylglucosamine-specific IIA component [EC:2.7.1.1]                                                                | env          | Gene absent                |
|      | <i>gcc11</i>     | 60          |         | hypothetical protein                                                                                                                             |              | Point mutations            |
|      | <i>gcc12</i>     | 190         |         | hypothetical protein                                                                                                                             |              | Gene absent                |
|      | <i>gcc13</i>     | 55          |         | hypothetical protein                                                                                                                             |              | Gene absent                |
|      | <i>gcc14</i>     | 188         |         | hypothetical protein                                                                                                                             |              | Gene absent                |
|      | <i>gcc15</i>     | 374         |         | hypothetical protein                                                                                                                             |              | Gene absent                |
|      | <i>gcc16</i>     | 108         |         | hypothetical protein                                                                                                                             |              | Gene absent                |
|      | <i>gcc17</i>     | 45          |         | hypothetical protein                                                                                                                             |              | Gene absent                |
|      | <i>gcc18</i>     | 531         |         | hypothetical protein                                                                                                                             |              | Gene absent                |
|      | <i>phd</i>       | 86          | K19185  | Antitoxin Phd                                                                                                                                    |              | Gene absent                |
|      | <i>doc</i>       | 124         | K07341  | Toxin: death on curing protein                                                                                                                   |              | Gene absent                |
|      | <i>gcc19</i>     | 103         |         | hypothetical protein                                                                                                                             |              | Gene absent                |
|      | <i>gcc110</i>    | 133         |         | hypothetical protein                                                                                                                             |              | Gene absent                |
|      | <i>lyg</i>       | 469         |         | hypothetical protein                                                                                                                             |              | Gene absent                |
|      | <i>gcc111</i>    | 176         |         | hypothetical protein                                                                                                                             |              | Gene absent                |
|      | <i>gcc112</i>    | 65          | K07729  | Relative transcriptional regulator                                                                                                               |              | Gene absent                |
|      | <i>gcc113</i>    | 134         |         | hypothetical protein                                                                                                                             |              | Gene absent                |
|      | <i>Tn916</i>     | 284         |         | hypothetical protein                                                                                                                             |              | Gene absent                |
|      | <i>xerD</i>      | 409         |         | hypothetical protein                                                                                                                             |              | Gene absent                |
|      | <i>gcc114</i>    | 65          |         | hypothetical protein                                                                                                                             |              | Gene absent                |
|      | <i>gcc115</i>    | 273         |         | hypothetical protein                                                                                                                             |              | Gene absent                |
|      | <i>gcc116</i>    | 470         |         | hypothetical protein                                                                                                                             |              | Gene absent                |
|      | <i>gcc117</i>    | 146         |         | hypothetical protein                                                                                                                             |              | Gene absent                |
|      | <i>gcc118</i>    | 103         |         | hypothetical protein                                                                                                                             |              | Gene absent                |
|      | <i>gcc119</i>    | 131         |         | hypothetical protein                                                                                                                             |              | Gene absent                |
|      | <i>gcc120</i>    | 139         |         | hypothetical protein                                                                                                                             |              | Gene absent                |
|      | <i>gcc121</i>    | 97          |         | hypothetical protein                                                                                                                             |              | Gene absent                |
|      | <i>gcc122</i>    | 248         |         | hypothetical protein                                                                                                                             |              | Gene absent                |
|      | <i>gcc123</i>    | 98          |         | hypothetical protein                                                                                                                             |              | Gene absent                |
|      | <i>gcc124</i>    | 105         |         | hypothetical protein                                                                                                                             |              | Gene absent                |
|      | <i>gcc125</i>    | 102         |         | hypothetical protein                                                                                                                             |              | Gene absent                |
|      | <i>gcc126</i>    | 197         |         | hypothetical protein                                                                                                                             |              | Gene absent                |
|      | <i>mif</i>       | 1166        | K03723  | mif: transcription-repair coupling factor (superfamily II helicase) [EC:3.6.4.1]                                                                 |              | Point mutations            |
|      | <i>gcc127</i>    | 386         |         | hypothetical protein                                                                                                                             |              | Gene absent                |
|      | <i>xre</i>       | 198         |         | HTH-type transcriptional regulator Xre                                                                                                           |              | Gene absent                |
|      | <i>gcc128</i>    | 62          |         | hypothetical protein                                                                                                                             |              | Gene absent                |
|      | <i>gcc129</i>    | 201         |         | hypothetical protein                                                                                                                             |              | Gene absent                |
|      | <i>gcc130</i>    | 151         |         | hypothetical protein                                                                                                                             |              | Gene absent                |
|      | <i>gcc131</i>    | 111         |         | hypothetical protein                                                                                                                             |              | Gene absent                |
|      | <i>gcc132</i>    | 74          |         | hypothetical protein                                                                                                                             |              | Gene absent                |
|      | <i>gcc133</i>    | 64          |         | hypothetical protein                                                                                                                             |              | Gene absent                |
|      | <i>gcc134</i>    | 91          |         | hypothetical protein                                                                                                                             |              | Gene absent                |
|      | <i>gcc135</i>    | 465         |         | hypothetical protein                                                                                                                             |              | Gene absent                |
|      | <i>gcc136</i>    | 96          |         | hypothetical protein                                                                                                                             |              | Gene absent                |
|      | <i>gcc137</i>    | 186         |         | hypothetical protein                                                                                                                             |              | Gene absent                |
|      | <i>gcc138</i>    | 163         |         | hypothetical protein                                                                                                                             |              | Gene absent                |
|      | <i>gcc139</i>    | 126         |         | hypothetical protein                                                                                                                             |              | Gene absent                |
|      | <i>gcc140</i>    | 98          |         | hypothetical protein                                                                                                                             |              | Gene absent                |
|      | <i>gcc141</i>    | 116         |         | hypothetical protein                                                                                                                             |              | Gene absent                |
|      | <i>acpP</i>      | 56          | K02078  | Acyl carrier protein                                                                                                                             | met          | Point mutations            |
|      | <i>gcc142</i>    | 73          |         | hypothetical protein                                                                                                                             |              | Truncated protein          |
| CC10 | <i>gcc101</i>    | 102         |         | hypothetical protein                                                                                                                             |              | Truncated protein          |
|      | <i>gcc102</i>    | 113         |         | hypothetical protein                                                                                                                             |              | Gene absent                |
|      | <i>gcc103</i>    | 687         |         | putative IiABC operon regulator                                                                                                                  |              | Gene absent                |
|      | <i>gatB_1</i>    | 393         | K02774  | PTS-Gat-EIIB; PTS system, galactitol-specific IIB component [EC:2.7.1.200]                                                                       | met/env      | Gene absent                |
|      | <i>gatC_1</i>    | 446         | K02775  | PTS-Gat-EIIC; PTS system, galactitol-specific IIC component [EC:2.7.1.200]                                                                       | met/env      | Gene absent                |
|      | <i>rhaD</i>      | 277         | K01629  | Rhamnose-1-phosphate aldolase [EC:4.1.2.19]                                                                                                      | met          | Gene absent                |
|      | <i>gatA</i>      | 155         | K02773  | PTS-Gat-EIIA; PTS system, galactitol-specific IIA component [EC:2.7.1.200]                                                                       | met/env      | Gene absent                |
|      | <i>gatC_2</i>    | 444         | K02775  | PTS-Gat-EIIC; PTS system, galactitol-specific IIC component [EC:2.7.1.200]                                                                       | met/env      | Gene absent                |
|      | <i>gatB_2</i>    | 95          | K02774  | PTS-Gat-EIIB; PTS system, galactitol-specific IIB component [EC:2.7.1.200]                                                                       | met/env      | Gene absent                |
|      | <i>sovS</i>      | 277         |         | Regulatory protein                                                                                                                               |              | Gene absent                |
|      | <i>araO</i>      | 426         | K02027  | ABC MS S: multiple sugar transport system substrate-binding protein                                                                              |              | Gene absent                |
|      | <i>araF</i>      | 297         | K02025  | ABC MS P: multiple sugar transport system permease protein - Lactase transport system permease protein                                           |              | Gene absent                |
|      | <i>araO</i>      | 278         | K02026  | ABC MS P1: multiple sugar transport system permease protein - L-arabinose transport system permease protein                                      |              | Gene absent                |
|      | <i>gcc104</i>    | 734         | K07407  | E3.2.1.22B, alpha-galactosidase [EC:3.2.1.22]                                                                                                    | met          | Gene absent                |
|      | <i>galK</i>      | 391         | K00849  | Galactokinase [EC:2.7.1.5]                                                                                                                       | met          | Gene absent                |
|      | <i>galT</i>      | 383         | K00665  | UDP-galucose-4-epimerase/UDP-glucose 4-epimerase [EC:2.7.1.2]                                                                                    | met          | Gene absent                |
|      | <i>galE</i>      | 332         | K01784  | UDP-glucose 4-epimerase [EC:5.1.3.2]                                                                                                             | met          | Synonymous point mutations |
|      | <i>galM</i>      | 334         | K01785  | Aldose 1-epimerase [EC:5.1.3.3]                                                                                                                  | met          | Gene absent                |
|      | <i>cas2</i>      | 283         | K19118  | CRISPR-associated protein                                                                                                                        |              | Gene absent                |
|      | <i>cas4</i>      | 224         | K07464  | CRISPR-associated exonuclease                                                                                                                    |              | Gene absent                |
|      | <i>cas2</i>      | 98          | K09951  | CRISPR-associated protein                                                                                                                        |              | Gene absent                |
|      | <i>gcc105</i>    | 70          |         | hypothetical protein                                                                                                                             |              | Gene absent                |
|      | <i>gcc106</i>    | 383         |         | hypothetical protein                                                                                                                             |              | Truncated protein          |
|      | <i>galK_2</i>    | 317         | K00849  | Galactokinase [EC:2.7.1.5]                                                                                                                       | met          | Gene absent                |
|      | <i>gcc107</i>    | 58          |         | hypothetical protein                                                                                                                             |              | Gene absent                |
|      | <i>ydfK</i>      | 239         | K07150  | Putative membrane protein                                                                                                                        |              | Point mutations            |
|      | <i>phoE</i>      | 218         |         | Phosphate regulon transcriptional regulatory protein                                                                                             |              | Gene absent                |
|      | <i>bacS</i>      | 447         |         | Genal transcription halidine-protein kinase                                                                                                      |              | Gene absent                |
|      | <i>gcc108</i>    | 176         |         | hypothetical protein                                                                                                                             |              | Gene absent                |
|      | <i>gcc109</i>    | 1159        |         | IgA FC receptor                                                                                                                                  |              | Gene absent                |
|      | <i>gcc110</i>    | 341         |         | hypothetical protein                                                                                                                             |              | Gene absent                |
|      | <i>gcc111</i>    | 303         |         | hypothetical protein                                                                                                                             |              | Gene absent                |
|      | <i>gcc112</i>    | 501         | K06919  | Putative DNA primase/helicase                                                                                                                    |              | Gene absent                |
|      | <i>gcc113</i>    | 286         |         | hypothetical protein                                                                                                                             |              | Gene absent                |
|      | <i>gcc114</i>    | 66          |         | hypothetical protein                                                                                                                             |              | Gene absent                |
|      | <i>gcc115</i>    | 103         |         | hypothetical protein                                                                                                                             |              | Gene absent                |
|      | <i>gcc116</i>    | 388         |         | hypothetical protein                                                                                                                             |              | Point mutations            |
|      | <i>yeeL</i>      | 215         |         | Regulatory protein                                                                                                                               |              | Point mutations            |
|      | <i>gcc117</i>    | 205         | K07078  | Regulatory protein                                                                                                                               |              | Synonymous point mutations |
|      | <i>gcc118</i>    | 292         |         | Z7-O-demethylfarnesyl SV methyltransferase                                                                                                       |              | Truncated protein          |
|      | <i>lacC</i>      | 311         | K00917  | Taqotase 6-phosphate kinase [EC:2.7.1.144]                                                                                                       | met          | Truncated protein          |
| CC19 | <i>mifH</i>      | 411         | K08152  | MFS transporter, DHAT family, multidrug resistance protein B                                                                                     |              | Point mutations            |
|      | <i>nicC</i>      | 273         | K03742  | Nicotinamide nucleotide amidase - Putative competence-damage inducible protein [EC:3.5.1.42]                                                     | met          | Point mutations            |
|      | <i>gcc191</i>    | 390         |         | hypothetical protein                                                                                                                             |              | Point mutations            |
|      | <i>xerC</i>      | 235         |         | Tyrosine recombinase                                                                                                                             |              | Gene absent                |
|      | <i>gcc192</i>    | 76          |         | hypothetical protein                                                                                                                             |              | Gene absent                |
|      | <i>imrM</i>      | 75          |         | HTH-type transcriptional regulator                                                                                                               |              | Gene absent                |
|      | <i>gcc193</i>    | 122         |         | hypothetical protein                                                                                                                             |              | Gene absent                |
|      | <i>gcc194</i>    | 96          |         | hypothetical protein                                                                                                                             |              | Gene absent                |
|      | <i>zhaA</i>      | 710         | K01534  | Cd <sup>2+</sup> /Zn <sup>2+</sup> -exporting ATPase - putative cadmium-transporting ATPase [EC:3.6.3.3 3.6.3.5]                                 |              | Gene absent                |
|      | <i>casC</i>      | 123         | K21903  | ArskA toxin transcriptional regulator, heavy-metals responsive transcriptional repressor - Cadmium resistance transcriptional regulatory protein |              | Gene absent                |
|      | <i>gcc195</i>    | 100         |         | hypothetical protein                                                                                                                             |              | Gene absent                |
|      | <i>gcc196</i>    | 263         |         | hypothetical protein                                                                                                                             |              | Gene absent                |
|      | <i>gcc197</i>    | 199         |         | hypothetical protein                                                                                                                             |              | Gene absent                |
|      | <i>gcc198</i>    | 69          |         | hypothetical protein                                                                                                                             |              | Gene absent                |
|      | <i>copA</i>      | 158         | K17686  | Cu--exporting ATPase [EC:3.6.3.54]                                                                                                               | env          | Gene absent                |
|      | <i>gcc199</i>    | 130         |         | hypothetical protein                                                                                                                             |              | Gene absent                |
|      | <i>gcc110</i>    | 76          |         | hypothetical protein                                                                                                                             |              | Gene absent                |
|      | <i>gcc1911</i>   | 164         |         | hypothetical protein                                                                                                                             |              | Gene absent                |
|      | <i>gcc1912</i>   | 184         |         | hypothetical protein                                                                                                                             |              | Gene absent                |
|      | <i>gcc1913</i>   | 64          |         | hypothetical protein                                                                                                                             |              | Gene absent                |
|      | <i>gcc1914</i>   | 197         |         | hypothetical protein                                                                                                                             |              | Gene absent                |
|      | <i>gcc1915</i>   | 282         |         | hypothetical protein                                                                                                                             |              | Gene absent                |
|      | <i>gcc1916</i>   | 934         |         | N-acetylmuramoyl-L-alanine amidase domain-containing protein                                                                                     |              | Gene absent                |
|      | <i>gcc1917</i>   | 118         |         | hypothetical protein                                                                                                                             |              | Gene absent                |
|      | <i>gcc1918</i>   | 285         |         | hypothetical protein                                                                                                                             |              | Gene absent                |
|      | <i>gcc1919</i>   | 81          |         | hypothetical protein                                                                                                                             |              | Gene absent                |
|      | <i>varD4</i>     | 606         | K03205  | Type IV secretion system protein                                                                                                                 | env          | Gene absent                |
|      | <i>gcc1920</i>   | 163         |         | hypothetical protein                                                                                                                             |              | Gene absent                |
|      | <i>gcc1921</i>   | 195         |         | hypothetical protein                                                                                                                             |              | Gene absent                |
|      | <i>gcc1922</i>   | 79          |         | hypothetical protein                                                                                                                             |              | Gene absent                |
|      | <i>spxA</i>      | 128         |         | Regulatory protein                                                                                                                               |              | Gene absent                |
|      | <i>gcc1923</i>   | 143         |         | hypothetical protein                                                                                                                             |              | Gene absent                |
|      | <i>hpaII</i>     | 452         | K00558  | DNMT1: DNA (cytosine-5)-methyltransferase 1 - Modification methylase [EC:2.1.1.37]                                                               | met          | Gene absent                |
|      | <i>gcc1924</i>   | 273         |         | hypothetical protein                                                                                                                             |              | Gene absent                |
|      | <i>gcc1925</i>   | 58          |         | hypothetical protein                                                                                                                             |              | Gene absent                |
|      | <i>mmuP/rocE</i> | 459         | K16235  | S-methylmethionine amino-acid permease                                                                                                           |              | Point mutations            |
|      | <i>gcc1926</i>   | 186         |         | hypothetical protein                                                                                                                             |              | Point mutations            |
|      | <i>sstA</i>      | 284         | K07284  | Sorbose A [EC:3.4.22.70]                                                                                                                         |              | Gene absent                |
|      | <i>gcc1927</i>   | 706         |         | hypothetical protein                                                                                                                             |              | Gene absent                |
| CC17 | <i>gcc171</i>    | 89          |         | hypothetical protein                                                                                                                             |              | Point mutations            |
|      | <i>phT</i>       | 491         | K03305  | Phenol-dependent oligopeptide transporter, POT family                                                                                            |              | Synonymous point mutations |
|      | <i>manR</i>      | 363         | K02529  | HTH-type LacI family transcriptional regulator                                                                                                   |              | Point mutations            |
|      | <i>phT</i>       | 458         | K02445  | MFS transporter, OPA family, glycerol-3-phosphate transporter                                                                                    | env          | Point mutations            |
|      | <i>arpP</i>      | 269         | K02030  | ABC, polar amino acid transport system substrate-binding protein - Arginine-binding extracellular protein                                        | env          | Synonymous point mutations |
|      | <i>gcc172</i>    | 115         |         | hypothetical protein                                                                                                                             |              | Gene absent                |
|      | <i>gcc173</i>    | 147         |         | hypothetical protein                                                                                                                             |              | Gene absent                |
|      | <i>gcc174</i>    | 68          |         | hypothetical protein                                                                                                                             |              | Gene absent                |
|      | <i>fluC</i>      | 334         | K02015  | ABC, iron complex transport system permease protein - Iron-uptake system permease protein                                                        | env          | Point mutations            |
|      | <i>ascY</i>      | 413         | KV03076 | Accessory Sec system protein translocase subunit                                                                                                 | met/env/cell | Gene absent                |
|      | <i>asp1</i>      | 526         | K12288  | Accessory secretory protein Asp1                                                                                                                 | env          | Gene absent                |
|      | <i>asp2</i>      | 530         | K12269  | Accessory secretory protein Asp2                                                                                                                 | env          | Gene absent                |
|      | <i>asp3</i>      | 182         | K12270  | Accessory secretory protein Asp3                                                                                                                 | env          | Gene absent                |
|      | <i>gfl1</i>      | 507         |         | Glycosyltransferase                                                                                                                              |              | Gene absent                |
|      | <i>gfl2</i>      | 443         |         | Glycosyltransferase-stabilizing protein                                                                                                          |              | Gene absent                |
|      | <i>gcc174</i>    | 56          |         | hypothetical protein                                                                                                                             |              | Gene absent                |
|      | <i>wbbJ</i>      | 332         |         | Beta-1,6-galactofuranosyltransferase                                                                                                             |              | Gene absent                |
|      | <i>gpaS</i>      | 571         |         | Putative glycosyltransferase                                                                                                                     |              | Gene absent                |

|                |      |        |                                                                                                      |          |                            |
|----------------|------|--------|------------------------------------------------------------------------------------------------------|----------|----------------------------|
| <i>capA</i>    | 393  | K07282 | Gamma-polyglutamate biosynthesis protein - Capsule biosynthesis protein                              |          | Point mutations            |
| <i>degV</i>    | 283  |        | hypothetical protein (containing DegV domain)                                                        |          | Synonymous point mutations |
| <i>yleE</i>    | 66   | K03828 | Putative acetyltransferase [EC:2.3.1.-]                                                              |          | Point mutations            |
| <i>efbB</i>    | 590  | K18888 | ATP-binding cassette, subfamily B, multistep efflux pump                                             | env      | Point mutations            |
| <i>gph</i>     | 450  | K03092 | Glutamate dehydrogenase (NADP+ specific) [EC:1.4.1.41]                                               | met      | Point mutations            |
| <i>yhcR</i>    | 691  | K01081 | 5-nucleotidase [EC:3.1.3.5]                                                                          | met      | Point mutations            |
| <i>glcA</i>    | 363  | K00005 | Glycerol dehydrogenase [EC:1.1.1.6]                                                                  | met      | Point mutations            |
| <i>goc175</i>  | 163  | K02755 | PTS-Bot-EIIA, PTS system, beta-glucoside-specific IIA component [EC:2.7.1.-]                         | env      | Point mutations            |
| <i>goc176</i>  | 435  | K01992 | ABC-2 type transport system permease protein                                                         | env      | Point mutations            |
| <i>goc177</i>  | 77   |        | hypothetical protein                                                                                 |          | Truncated protein          |
| <i>nasA</i>    | 108  | K01990 | ABC-2 type transport system ATP-binding protein                                                      | env      | Point mutations            |
| <i>dnbB</i>    | 830  | K03722 | ATP-dependent DNA helicase [EC:3.6.4.12]                                                             | met      | Point mutations            |
| <i>nikE</i>    | 133  | K10524 | Nickel transport system ATP-binding protein [EC:3.6.3.24]                                            | env      | Truncated protein          |
| <i>nikD</i>    | 263  | K15587 | Nickel transport system ATP-binding protein [EC:3.6.3.24]                                            | env      | Point mutations            |
| <i>gspA</i>    | 402  |        | General stress protein A                                                                             |          | Gene absent                |
| <i>bsaA</i>    | 235  |        | Putative transglycosylase                                                                            |          | Synonymous point mutations |
| <i>lydN</i>    | 37   |        | hypothetical protein                                                                                 |          | Point mutations            |
| <i>goc178</i>  | 586  | K00382 | DLI, dihydroloipoamide dehydrogenase [EC:1.8.1.4]                                                    | met/cell | Synonymous point mutations |
| <i>polnC</i>   | 463  | K00627 | DLAT, pyruvate dehydrogenase E2 component (dihydroloipoamide acetyltransferase) [EC:2.3.1.12]        | met      | Point mutations            |
| <i>acvA</i>    | 323  | K00161 | PDHA: pyruvate dehydrogenase E1 component alpha subunit [EC:1.2.4.1]                                 | met/env  | Synonymous point mutations |
| <i>glpD</i>    | 107  | K00976 | glpC: glucose-1-phosphate adenylyltransferase [EC:2.7.7.27]                                          | met/cell | Point mutations            |
| <i>glpC</i>    | 380  | K00975 | Glucose-1-phosphate adenylyltransferase                                                              | met/cell | Point mutations            |
| <i>metW</i>    | 245  | K02071 | Methionine import ATP-binding protein MetN                                                           | env      | Point mutations            |
| <i>goc179</i>  | 230  |        | hypothetical protein                                                                                 |          | Truncated protein          |
| <i>yhcW</i>    | 407  | K08177 | oxT, MFS transporter, OFA family, oxalate/formate antiporter                                         | env      | Point mutations            |
| <i>luxA</i>    | 348  |        | Alkanal monooxygenase alpha chain                                                                    |          | Point mutations            |
| <i>goc1710</i> | 58   |        | hypothetical protein                                                                                 |          | Gene absent                |
| <i>goc1711</i> | 65   |        | hypothetical protein                                                                                 |          | Truncated protein          |
| <i>goc1712</i> | 134  |        | hypothetical protein                                                                                 |          | Gene absent                |
| <i>goc1713</i> | 406  |        | hypothetical protein                                                                                 |          | Gene absent                |
| <i>goc1714</i> | 359  |        | hypothetical protein                                                                                 |          | Point mutations            |
| <i>casR</i>    | 320  |        | CdsA regulatory protein                                                                              |          | Synonymous point mutations |
| <i>goc1715</i> | 282  |        | hypothetical protein                                                                                 |          | Gene absent                |
| <i>goc1716</i> | 415  |        | hypothetical protein                                                                                 |          | Gene absent                |
| <i>lacC</i>    | 270  | K00917 | 1,4-lactose 6-phosphate kinase [EC:2.7.1.144]                                                        | met      | Point mutations            |
| <i>goc1717</i> | 66   |        | FAM-binding protein                                                                                  |          | Truncated protein          |
| <i>dnbB</i>    | 370  | K02346 | DNA polymerase IV [EC:2.7.7.7]                                                                       | met      | Point mutations            |
| <i>mta_2</i>   | 58   |        | hypothetical protein                                                                                 |          | Point mutations            |
| <i>glpF_1</i>  | 238  | K02440 | GLPF: glycerol uptake facilitator protein                                                            | env      | Point mutations            |
| <i>goc1718</i> | 92   |        | hypothetical protein                                                                                 |          | Gene absent                |
| <i>endA</i>    | 118  | K15051 | DNA-entry nuclease                                                                                   |          | Gene absent                |
| <i>goc1719</i> | 67   |        | hypothetical protein                                                                                 |          | Point mutations            |
| <i>janE</i>    | 318  | K00077 | 2-dehydropanoate 2-reductase [EC:1.1.1.169]                                                          | met      | Gene absent                |
| <i>goc1720</i> | 235  |        | hypothetical protein                                                                                 |          | Gene absent                |
| <i>puuD</i>    | 230  | K07010 | Putative glutamine amidotransferase                                                                  | met      | Point mutations            |
| <i>yleM_1</i>  | 278  | K02030 | ABC, polar amino acid transport system substrate-binding protein                                     | env      | Point mutations            |
| <i>speG_1</i>  | 186  |        | Spermidine N(1)-acetyltransferase                                                                    |          | Gene absent                |
| <i>cas3</i>    | 480  | K07012 | CRISPR-associated endonuclease/helicase [EC:3.1.-.3.6.4.-]                                           | cell     | Point mutations            |
| <i>goc1721</i> | 271  |        | Putative phosphatase                                                                                 |          | Point mutations            |
| <i>goc1722</i> | 895  | K01537 | Ca <sup>2+</sup> -transporting ATPase [EC:3.6.3.8]                                                   |          | Synonymous point mutations |
| <i>gpaA</i>    | 102  |        | hypothetical protein                                                                                 |          | Synonymous point mutations |
| <i>goc1723</i> | 205  |        | hypothetical protein                                                                                 |          | Point mutations            |
| <i>gpp1724</i> | 288  | K07052 | hypothetical protein                                                                                 |          | Point mutations            |
| <i>casS</i>    | 419  |        | Sensor histidine kinase                                                                              |          | Point mutations            |
| <i>lysS</i>    | 834  | K01869 | LARS: leucyl-RNA synthetase [EC:6.1.1.4]                                                             | met      | Point mutations            |
| <i>pta</i>     | 331  | K00625 | Phosphate acetyltransferase [EC:2.3.1.8]                                                             | met      | Point mutations            |
| <i>ydgG</i>    | 197  |        | NADP-dependent 3-hydroxy acid dehydrogenase                                                          |          | Truncated protein          |
| <i>pyrB</i>    | 308  | K00609 | Aspartate carbamoyltransferase catalytic subunit [EC:2.1.3.2]                                        | met      | Point mutations            |
| <i>smc_1</i>   | 625  |        | Chromosome partition protein Smc                                                                     |          | Truncated protein          |
| <i>goc1725</i> | 177  |        | hypothetical protein                                                                                 |          | Gene absent                |
| <i>gpp1726</i> | 159  |        | hypothetical protein                                                                                 |          | Gene absent                |
| <i>gpp1727</i> | 136  |        | hypothetical protein                                                                                 |          | Gene absent                |
| <i>gpp1728</i> | 89   |        | hypothetical protein                                                                                 |          | Gene absent                |
| <i>goc1729</i> | 127  |        | hypothetical protein                                                                                 |          | Gene absent                |
| <i>lysS</i>    | 580  | K07704 | Two-component system, LysTR family, sensor histidine kinase [EC:2.7.13.3]                            | met/env  | Point mutations            |
| <i>lysR</i>    | 486  |        | Transcriptional regulator LysR                                                                       |          | Point mutations            |
| <i>amx</i>     | 680  |        | Acylamidase                                                                                          |          | Truncated protein          |
| <i>pacB</i>    | 414  | K19689 | Aminopeptidase [EC:3.4.11.-]                                                                         | met      | Point mutations            |
| <i>lvrB</i>    | 664  | K03702 | Exonuclease ABC subunit B - LvrABC system protein                                                    | met      | Point mutations            |
| <i>prp_2</i>   | 1386 |        | PilI-type protease                                                                                   |          | Gene absent                |
| <i>goc1730</i> | 384  |        | hypothetical protein                                                                                 |          | Gene absent                |
| <i>mutT</i>    | 175  | K03574 | 8-oxo-dGTP diphosphatase [EC:3.6.1.55]                                                               | met      | Truncated protein          |
| <i>goc1731</i> | 56   |        | hypothetical protein                                                                                 |          | Truncated protein          |
| <i>sigA</i>    | 370  | K03086 | RNA polymerase primary sigma factor                                                                  | met      | Synonymous point mutations |
| <i>goc1732</i> | 61   |        | hypothetical protein                                                                                 |          | Gene absent                |
| <i>lspB</i>    | 190  | K03100 | Signal peptidase I [EC:3.4.21.89]                                                                    | met/cell | Gene absent                |
| <i>intA_2</i>  | 1435 |        | Interralin-A                                                                                         |          | Gene absent                |
| <i>goc1733</i> | 503  |        | Fimbrial subunit type 1                                                                              |          | Gene absent                |
| <i>lypB</i>    | 305  | K12987 | Rhamnosyltransferase [EC:2.4.1.1]                                                                    | met      | Point mutations            |
| <i>sapA</i>    | 457  | K01361 | C5a peptidase - lactocepin [EC:3.4.21.96]                                                            | met      | Truncated protein          |
| <i>strA</i>    | 292  | K07284 | Sortase A [EC:3.4.22.70]                                                                             | met      | Gene absent                |
| <i>goc1734</i> | 224  |        | hypothetical protein                                                                                 |          | Gene absent                |
| <i>ramH_1</i>  | 189  |        | hypothetical protein                                                                                 |          | Point mutations            |
| <i>goc1735</i> | 282  |        | putative NTE family protein                                                                          |          | Point mutations            |
| <b>CC23</b>    |      |        |                                                                                                      |          |                            |
| <i>goc231</i>  | 207  |        | hypothetical protein                                                                                 |          | Gene absent                |
| <i>goc232</i>  | 86   |        | hypothetical protein                                                                                 |          | Gene absent                |
| <i>goc233</i>  | 368  |        | hypothetical protein                                                                                 |          | Gene absent                |
| <i>comR</i>    | 301  | K20342 | HTH-type transcriptional regulator, regulator for ComX                                               | cell     | Gene absent                |
| <i>yvgN_2</i>  | 115  |        | putative oxidoreductase                                                                              |          | Point mutations            |
| <i>goc234</i>  | 132  |        | hypothetical protein                                                                                 |          | Truncated protein          |
| <i>goc235</i>  | 369  |        | hypothetical protein                                                                                 |          | Gene absent                |
| <i>goc236</i>  | 173  |        | hypothetical protein                                                                                 |          | Gene absent                |
| <i>goc237</i>  | 95   |        | hypothetical protein                                                                                 |          | Gene absent                |
| <i>goc238</i>  | 285  |        | hypothetical protein                                                                                 |          | Gene absent                |
| <i>goc239</i>  | 97   |        | hypothetical protein                                                                                 |          | Gene absent                |
| <i>goc2310</i> | 135  |        | hypothetical protein                                                                                 |          | Gene absent                |
| <i>goc2311</i> | 119  |        | hypothetical protein                                                                                 |          | Gene absent                |
| <i>hasS</i>    | 462  | K01154 | Type I restriction enzyme, S subunit - EcoKI specificity protein [EC:3.1.21.3]                       | cell     | Gene absent                |
| <i>goc2312</i> | 507  |        | hypothetical protein                                                                                 |          | Point mutations            |
| <i>goc2313</i> | 107  |        | hypothetical protein                                                                                 |          | Point mutations            |
| <i>argH</i>    | 384  |        | D-alanyl-D-alanine-carboxypeptidase/endorpeptidase                                                   |          | Point mutations            |
| <i>fabG_1</i>  | 241  | K00059 | 3-oxoacyl-(acyl-carrier protein) reductase [EC:1.1.1.100]                                            | met      | Synonymous point mutations |
| <i>cyfE</i>    | 868  | K11052 | Cyclic uncharacterised protein                                                                       | env      | Point mutations            |
| <i>goc17</i>   | 318  | K00605 | Aminomethyltransferase [EC:2.1.2.10]                                                                 | met      | Point mutations            |
| <i>fabF_1</i>  | 732  | K09458 | 3-oxoacyl-(acyl-carrier-protein) synthase II [EC:2.3.1.179]                                          | met      | Point mutations            |
| <i>goc2314</i> | 460  |        | hypothetical protein                                                                                 |          | Point mutations            |
| <i>CyR</i>     | 192  | K11056 | Cyclic uncharacterised protein                                                                       |          | Point mutations            |
| <i>goc2315</i> | 162  |        | hypothetical protein                                                                                 |          | Point mutations            |
| <i>fabA</i>    | 219  | K02068 | Putative ABC transport system ATP-binding protein - iron export                                      | env      | Synonymous point mutations |
| <i>goc2316</i> | 65   |        | hypothetical protein                                                                                 |          | Truncated protein          |
| <i>yvgM</i>    | 652  | K02004 | Putative ABC transport system permease protein                                                       | env      | Point mutations            |
| <i>graS</i>    | 313  |        | Sensor histidine kinase                                                                              |          | Synonymous point mutations |
| <i>smc_2</i>   | 537  |        | Chromosome partition protein                                                                         |          | Point mutations            |
| <i>goc2317</i> | 143  |        | hypothetical protein                                                                                 |          | Truncated protein          |
| <i>mntH</i>    | 523  | K03322 | Manganese/divalent metal cation transport protein                                                    | env      | Gene absent                |
| <i>goc2318</i> | 436  |        | hypothetical protein                                                                                 |          | Gene absent                |
| <i>cdtA</i>    | 263  | K11045 | cAMP factor                                                                                          | env      | Gene absent                |
| <i>dnbJ</i>    | 98   | K07473 | DNA-damage-inducible protein J                                                                       | cell     | Point mutations            |
| <i>goc2319</i> | 113  |        | hypothetical protein                                                                                 |          | Gene absent                |
| <i>goc2320</i> | 123  |        | hypothetical protein                                                                                 |          | Gene absent                |
| <i>goc2321</i> | 141  |        | hypothetical protein                                                                                 |          | Gene absent                |
| <i>xre_1</i>   | 113  |        | HTH-type transcriptional regulator                                                                   |          | Gene absent                |
| <i>xre_2</i>   | 105  |        | HTH-type transcriptional regulator                                                                   |          | Gene absent                |
| <i>goc2322</i> | 47   |        | hypothetical protein                                                                                 |          | Gene absent                |
| <i>xre_3</i>   | 144  |        | HTH-type transcriptional regulator                                                                   |          | Gene absent                |
| <i>goc2324</i> | 104  |        | hypothetical protein                                                                                 |          | Gene absent                |
| <i>goc2325</i> | 154  |        | hypothetical protein                                                                                 |          | Gene absent                |
| <i>goc2326</i> | 88   |        | hypothetical protein                                                                                 |          | Gene absent                |
| <i>smc</i>     | 754  |        | Chromosome partition protein                                                                         |          | Gene absent                |
| <i>goc2327</i> | 126  |        | hypothetical protein                                                                                 |          | Gene absent                |
| <i>xre</i>     | 75   |        | HTH-type transcriptional regulator                                                                   |          | Truncated protein          |
| <i>rsuR</i>    | 118  |        | HTH-type transcriptional regulator                                                                   |          | Gene absent                |
| <i>goc2328</i> | 834  |        | hypothetical protein                                                                                 |          | Gene absent                |
| <i>goc2329</i> | 181  |        | hypothetical protein                                                                                 |          | Gene absent                |
| <i>goc2330</i> | 125  |        | Transcriptional regulator                                                                            |          | Gene absent                |
| <i>rip5</i>    | 272  | K04783 | Yersiniabactin salicyl-AMP ligase [EC:6.3.2.-]                                                       | met      | Gene absent                |
| <i>goc2331</i> | 148  |        | 2-hydroxy-2-methyl-5-methyl-1-naphthoate-CoA ligase                                                  |          | Gene absent                |
| <i>goc2332</i> | 62   |        | hypothetical protein                                                                                 |          | Point mutations            |
| <i>goc2333</i> | 135  |        | hypothetical protein                                                                                 |          | Gene absent                |
| <i>ftsT</i>    | 199  | K16926 | Energy-coupling factor transport system substrate-specific component                                 | env      | Gene absent                |
| <i>goc17</i>   | 238  | K16785 | Energy-coupling factor transport system permease protein                                             | env      | Gene absent                |
| <i>goc2334</i> | 290  | K08147 | ABC-B-BAC, ATP-binding cassette, subfamily B                                                         | env      | Gene absent                |
| <i>msbA</i>    | 292  | K06147 | ABC-B-BAC, ATP-binding cassette, subfamily B - Lipid A export ATP-binding/permease protein           | env      | Gene absent                |
| <i>ndvA</i>    | 574  | K06147 | ABC-B-BAC, ATP-binding cassette, subfamily B - Beta-1-2-galactan export ATP-binding/permease protein | env      | Gene absent                |
| <i>glpT</i>    | 488  | K02445 | MFS transporter, OFA family, glycerol-3-phosphate transporter                                        | env      | Point mutations            |
| <i>goc2335</i> | 168  | K08940 | uncharacterized protein                                                                              |          | Point mutations            |
| <i>goc2336</i> | 676  |        | hypothetical protein                                                                                 |          | Truncated protein          |
| <i>vanYB</i>   | 251  | K07260 | Zinc D-Ala-D-Ala carboxypeptidase [EC:3.4.17.14]                                                     | met/env  | Gene absent                |
